# Supplementary material
Source: MDPI journal article supplement (https://www.mdpi.com/2076-3417/12/6/2815)
Supplement: s1 [file s1]

## Supplementary Material

*for*

# The September 27<sup>th</sup>, 2021, earthquake in central Crete (Greece). Detailed analysis of the earthquake sequence and indications for contemporary arc-parallel extension at the Hellenic arc

Emmanuel Vassilakis <sup>1, \*</sup>, George Kaviris <sup>2</sup>, Vasilis Kapetanidis <sup>2</sup>, Elena Papageorgiou <sup>3</sup>, Michael Fournelis <sup>3</sup>, Aliko Konsolaki <sup>1</sup>, Stelios Petrakis <sup>1</sup>, Christos P. Evangelidis <sup>4</sup>, John Alexopoulos <sup>2</sup>, Vassilios Karastathis <sup>4</sup>, Nicholas Voulgaris <sup>2</sup> and Gerassimos-Akis Tselentis <sup>1,4</sup>

- <sup>1</sup> Section of Geography and Climatology, Department of Geology and Geoenvironment, School of Sciences, National and Kapodistrian University of Athens, Panepistimiopolis Zografou, 15784 Athens, Greece; [evasilak@geol.uoa.gr](mailto:evasilak@geol.uoa.gr) (E.V.); [alikikons@geol.uoa.gr](mailto:alikikons@geol.uoa.gr) (A.K.); [spetrakis@geol.uoa.gr](mailto:spetrakis@geol.uoa.gr) (S.P.)
- <sup>2</sup> Section of Geophysics -Geothermics, Department of Geology and Geoenvironment, School of Sciences, National and Kapodistrian University of Athens, Panepistimiopolis Zografou, 15784 Athens, Greece; [gkaviris@geol.uoa.gr](mailto:gkaviris@geol.uoa.gr) (G.K.); [vkapetan@geol.uoa.gr](mailto:vkapetan@geol.uoa.gr) (V.K.); [jalexopoulos@geol.uoa.gr](mailto:jalexopoulos@geol.uoa.gr) (J.A.); [voulgaris@geol.uoa.gr](mailto:voulgaris@geol.uoa.gr) (N.V.); [tselenti@noa.gr](mailto:tselenti@noa.gr) (G.-A.T.)
- <sup>3</sup> Department of Physical and Environmental Geography, Aristotle University of Thessaloniki (AUTH), 54124 Thessaloniki, Greece; [elenpapageo@geo.auth.gr](mailto:elenpapageo@geo.auth.gr) (E.P.); [mfournelis@geo.auth.gr](mailto:mfournelis@geo.auth.gr) (M.F.)
- <sup>4</sup> Institute of Geodynamics, National Observatory of Athens, Lofos Nymfon, Athens, Greece; [cevan@noa.gr](mailto:cevan@noa.gr) (C.-P.E.); [karastathis@noa.gr](mailto:karastathis@noa.gr) (V.Kar.); [tselenti@noa.gr](mailto:tselenti@noa.gr) (G.-A.T.)
- \* Correspondence: [evasilak@geol.uoa.gr](mailto:evasilak@geol.uoa.gr)

## Table of Contents

|                                                                                                           |   |
|-----------------------------------------------------------------------------------------------------------|---|
| Section S1: Additional tables and figures .....                                                           | 2 |
| Section S2: Relocated earthquake catalogue (June 1 <sup>st</sup> – October 18 <sup>th</sup> , 2021) ..... | 8 |

## Section S1: Additional tables and figures

**Table S1.** Fault plane solutions for the mainshock of the 2021 Arkalochori sequence, as determined by different agencies.

| Source  | Latitude (°N) | Longitude (°E) | Centroid Depth (km) | M <sub>w</sub> | Strike (°) | Dip (°) | Rake (°) |
|---------|---------------|----------------|---------------------|----------------|------------|---------|----------|
| NOA     | 35.12         | 25.26          | 6                   | 5.9            | 195        | 59      | -95      |
| SL-NKUA | 35.14         | 25.27          | 14                  | 5.9            | 185        | 66      | -97      |
| GCMT    | 35.12         | 25.18          | 12                  | 5.9            | 213        | 46      | -96      |
| USGS    | 34.95         | 25.15          | 12                  | 6.0            | 215        | 35      | -106     |
| GFZ     | 35.18         | 25.25          | 16                  | 6.0            | 218        | 57      | -85      |
| INGV    | 35.10         | 25.18          | 10                  | 6.0            | 230        | 41      | -68      |
| IPGP    | 35.25         | 25.26          | 6                   | 6.0            | 229        | 55      | -75      |
| OCA     | 35.13         | 25.26          | 6                   | 6.0            | 225        | 70      | -90      |
| KOERI   | 35.12         | 25.21          | 10                  | 6.0            | 207        | 50      | -101     |
| ERD     | 35.39         | 25.35          | 11                  | 5.9            | 225        | 44      | -83      |
| CPPT    | 35.34         | 24.76          | 16                  | 6.0            | 239        | 28      | -55      |

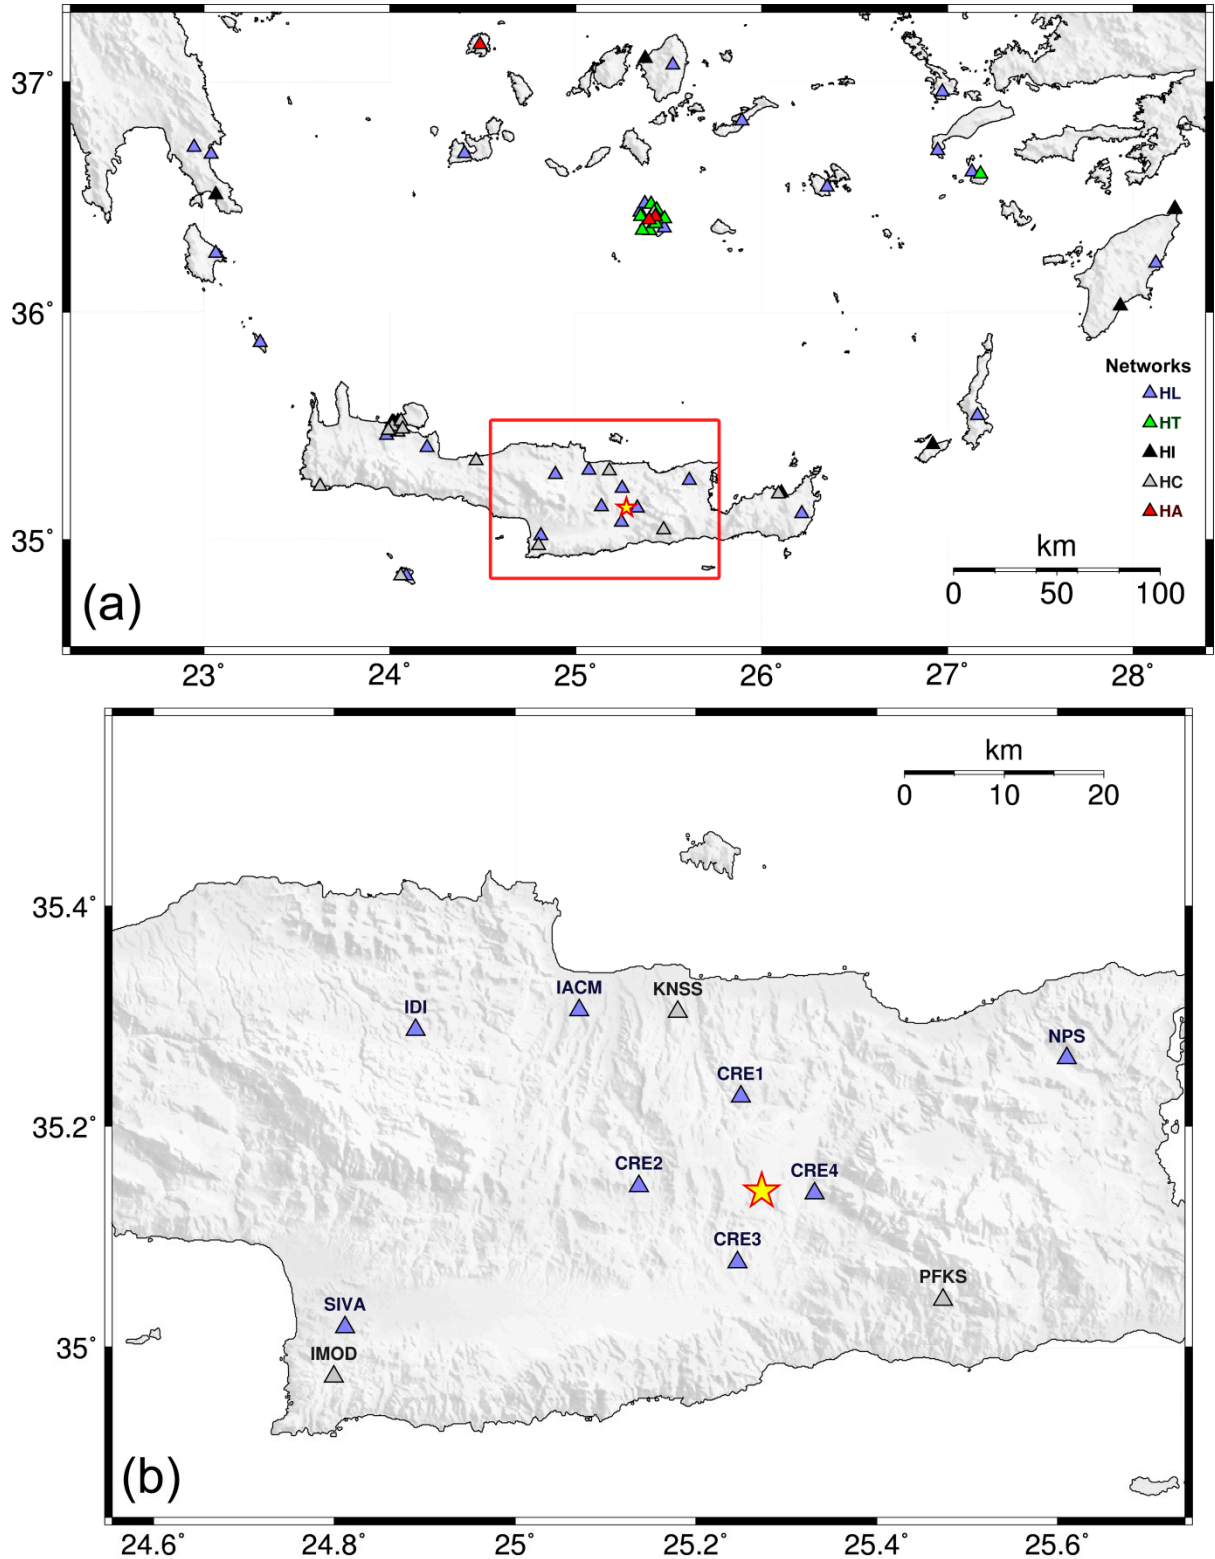

**Figure S1.** Seismological and accelerometric stations of the Hellenic Unified Seismological Network (HUSN) with available data during the study period (June 1<sup>st</sup> – October 18<sup>th</sup>, 2021). (a) Stations in the broader area of Southern Greece, (b) zoom in the area marked with a red rectangle in panel (a), showing stations at distances less than 60 km from the epicenter of the September 27<sup>th</sup>, 2021, mainshock at Arkalochori, Central Crete, marked with a star. See References [50,51,87–89] for information on the networks shown on the map.

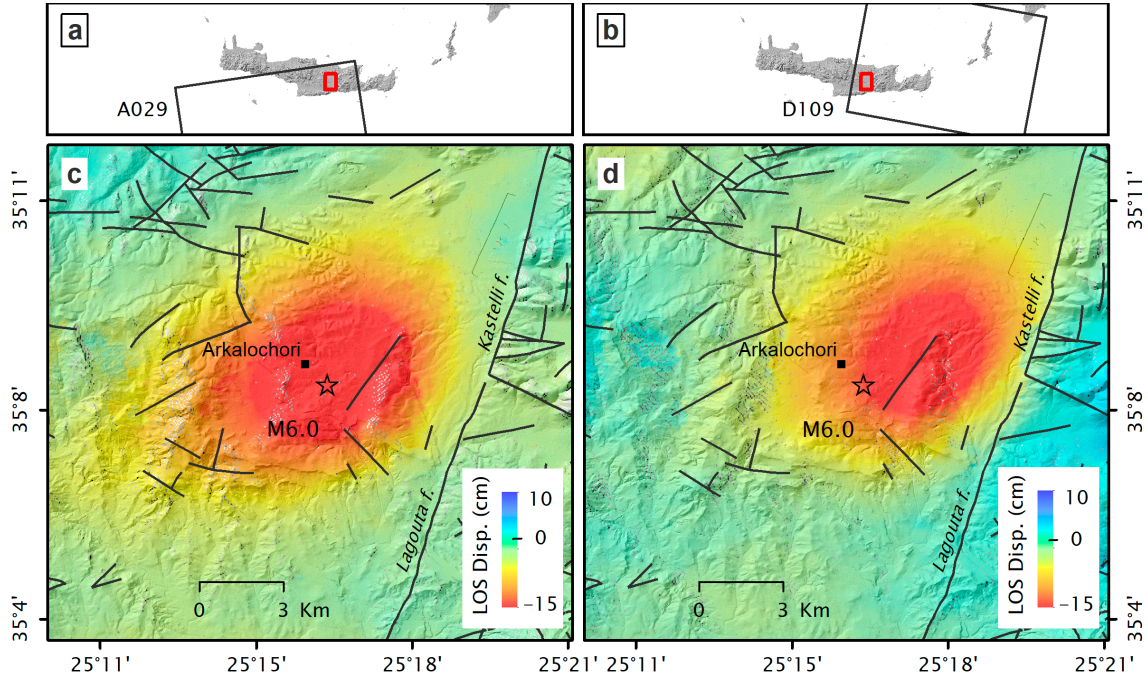

**Figure S2.** Co-seismic LoS displacement maps, as derived using GEP DIAPASON service, for ascending track A029 (18/09/2021-30/09/2021) and descending D109 (24/09/2021-30/10/2021) (c, d). The spatial extent of Sentinel-1 acquisition frames for both geometries are also indicated (a, b). Black lines correspond to faults (after [3]). The relocated epicenter of the September 27<sup>th</sup>, 2021, mainshock is marked with a star.

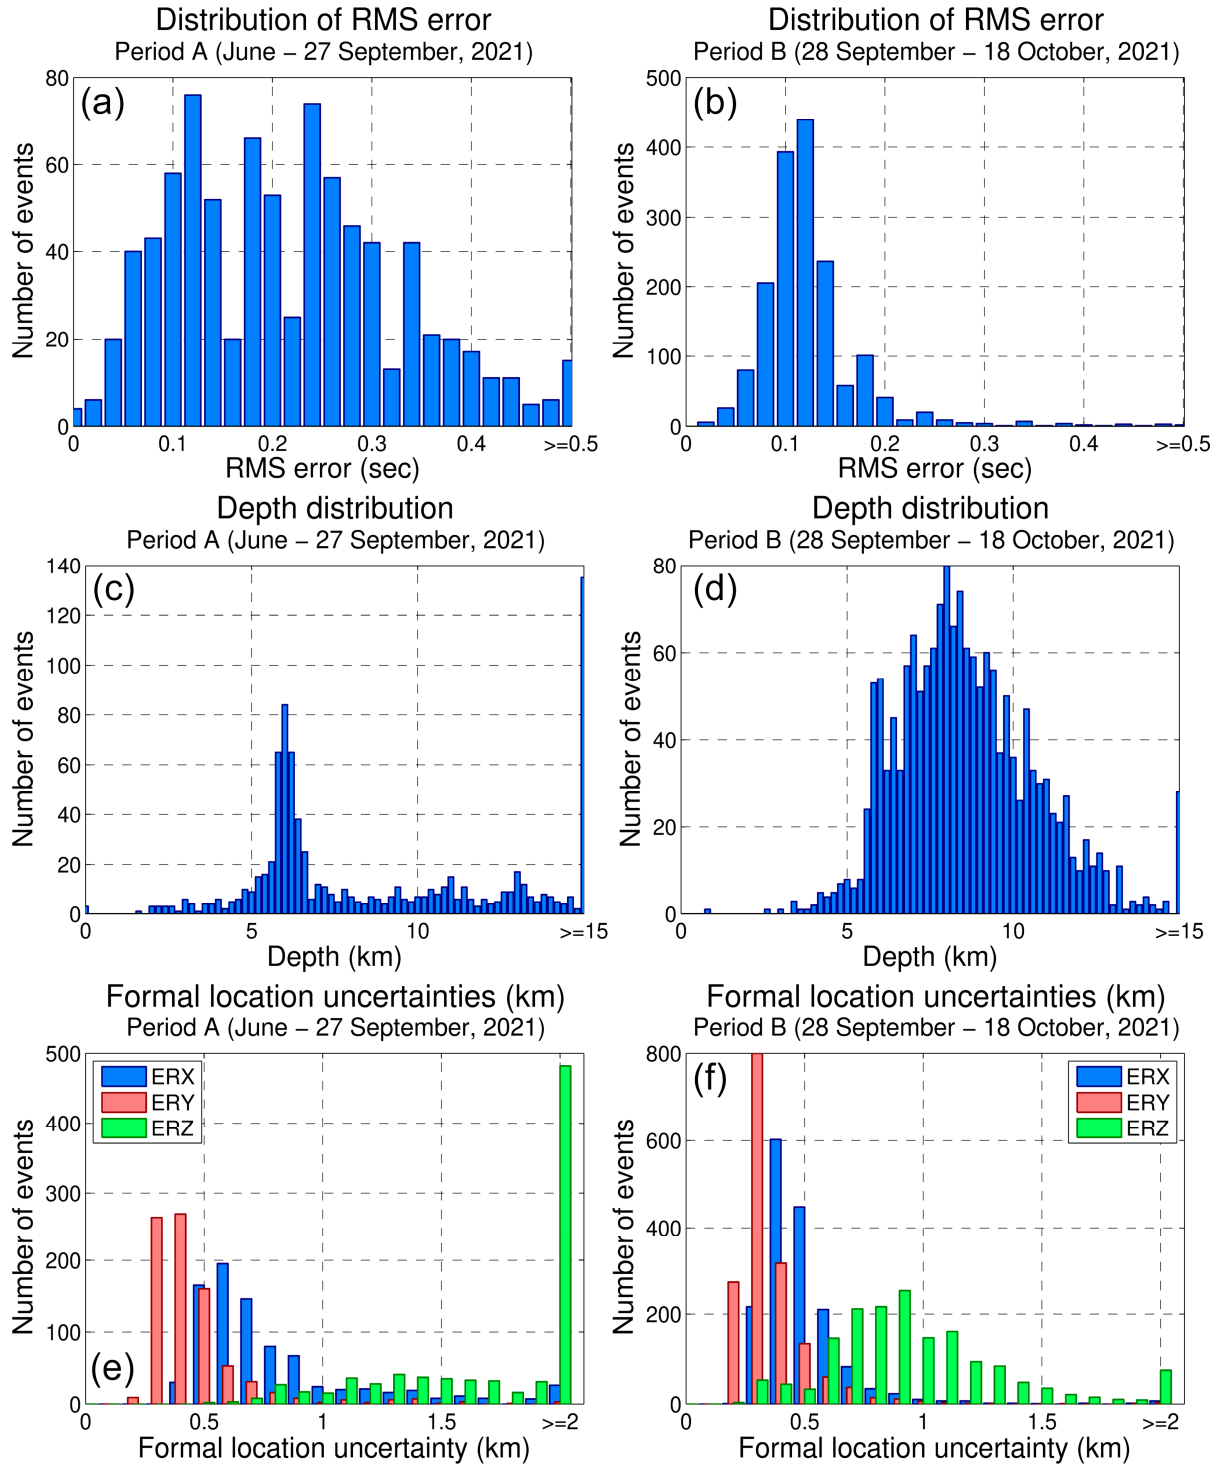

**Figure S3.** Initial location statistics (as reported by HypoInverse). (a, b) RMS travel-time residuals, (c, d) focal depth, (e, f) horizontal (ERX, ERY) and vertical (ERZ) formal location uncertainties, (a, c, e) for Period A, between June 1st and September 27<sup>th</sup>, 2021, and (b, d, f) for Period B, between September 28<sup>th</sup> and October 18<sup>th</sup>, 2021.

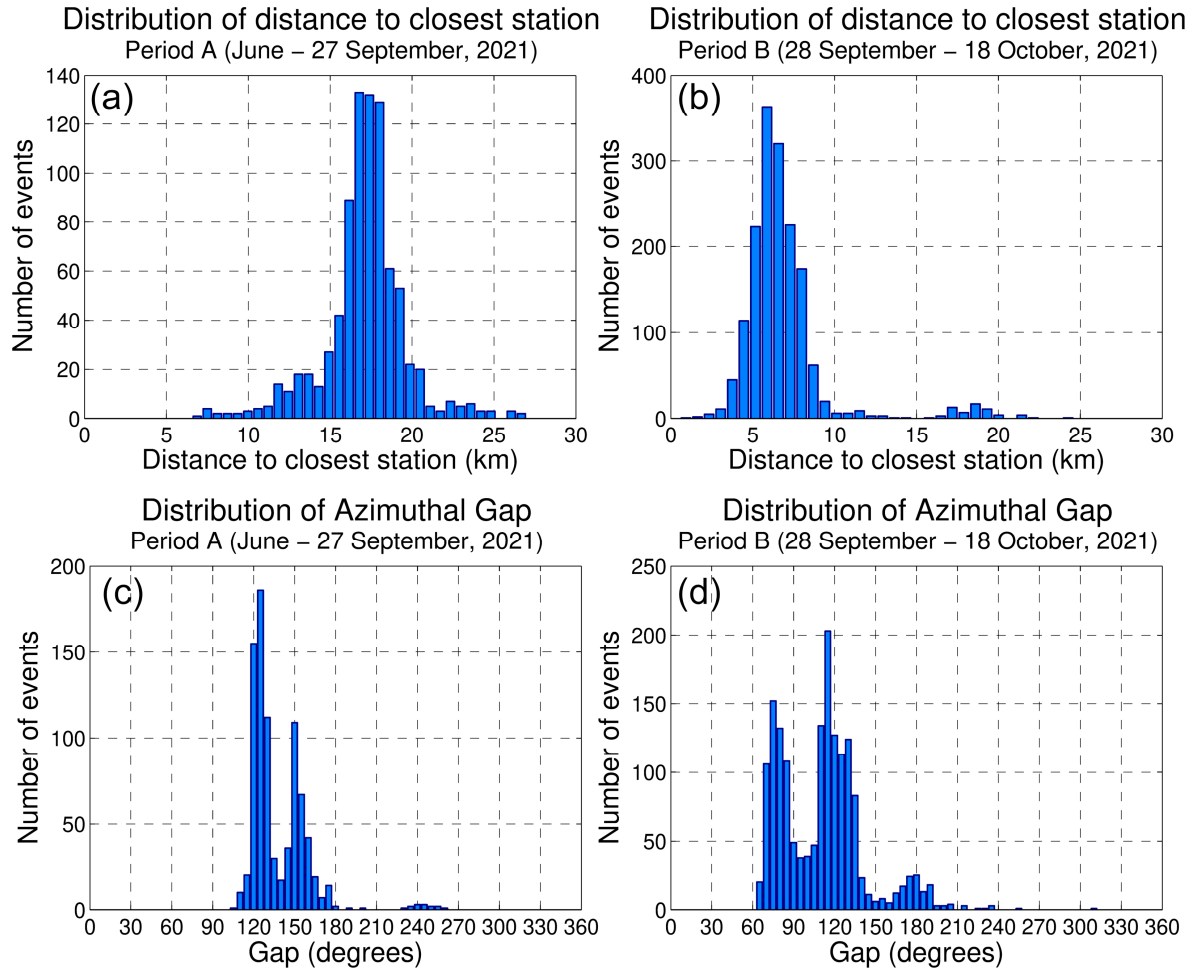

**Figure S4.** Initial location statistics. (a, b) Distribution of distance from the closest station with available data, (c, d) azimuthal gap, (a, c) for Period A, between June 1<sup>st</sup> and September 27<sup>th</sup>, 2021, and (b, d) for Period B, between September 28<sup>th</sup> and October 18<sup>th</sup>, 2021.



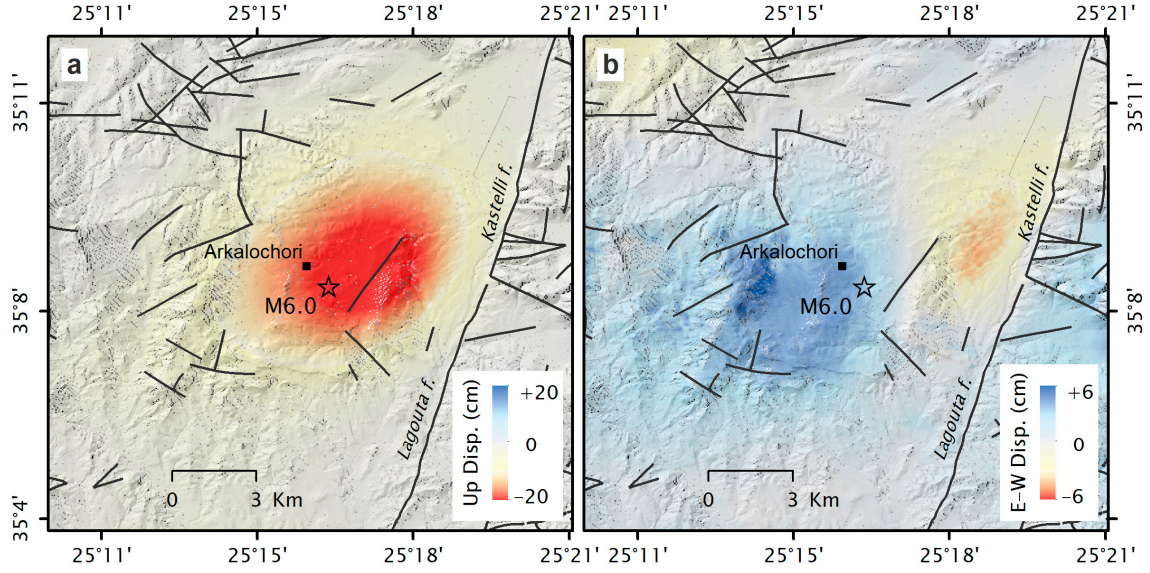

**Figure S5.** Vertical (a) and East-West (b) ground displacement maps as decomposed using Sentinel-1 DInSAR LoS observations from the ascending A029 and descending D109 tracks (see Table 1 in manuscript). Black lines correspond to faults (after [3]). The relocated epicenter of the September 27<sup>th</sup> 2021 mainshock is marked with a star.

## **Section S2: Relocated earthquake catalogue (June 1<sup>st</sup> – October 18<sup>th</sup>, 2021)**

The relocated catalogue is available in the Excel file “E1\_relocated\_catalogue.xlsx”.

### Column description:

- 1) event-code: identification code for each event, based on the origin time in yyyy-mm-dd-HH-MM-SS format, to facilitate temporal sorting.
  - 2-7) Year, Month, Day, Hour, Minute, Second of origin time.
  - 8) Latitude (°N).
  - 9) Longitude (°E).
  - 10) Focal Depth (km).
  - 11) Magnitude.
  - 12) Cluster ID: spatial group number (CLID).
  - 13) MinDist: Epicentral distance (km) of the closest station with available data.
- Uncertainties of initial locations, as reported by the HypoInverse location code:
- 14) RMS: Root mean square of the travel-time residual (sec)
  - 15-17) ERX, ERY, ERZ: absolute location uncertainties (km) on each of the three dimensions.
  - 18) Gap: azimuthal gap.
  - 19) Nsta: number of stations with available data.
