# Supplementary material
Source: MDPI journal article supplement (https://www.mdpi.com/2076-3417/12/6/2815)
Supplement: s1 [file s1 › E1_relocated_catalogue.xlsx]

## Sheet: Sheet1
event-code	Year	Month	Day	Hour	Min	Sec	Latitude	Longitude	Depth (km)	Magnitude	Cluster ID	MinDist	RMS	ERX	ERY	ERZ	Gap	Nsta
2021-06-01-21-14-18	2021	6	1	21	14	19.08	35.1617	25.2444	7.32	1.6	1	17.52	0.25	0.73	0.4	2.03	151	19
2021-06-02-22-54-55	2021	6	2	22	54	56.28	35.1583	25.2476	7.56	1.6	1	17.93	0.18	0.59	0.39	1.6	153	19
2021-06-03-14-05-29	2021	6	3	14	5	28.75	35.1555	25.2478	6.81	2.5	1	18.55	0.29	0.42	0.26	0.99	154	39
2021-06-03-20-59-52	2021	6	3	20	59	51.64	35.1536	25.247	6.69	1.8	1	17.38	0.13	0.44	0.24	0.74	152	26
2021-06-03-23-29-34	2021	6	3	23	30	15.92	35.1568	25.2476	7.09	2.3	1	18.62	0.24	0.39	0.24	0.72	154	37
2021-06-03-23-40-25	2021	6	3	23	40	24.56	35.1572	25.2473	7.21	2.4	1	19.85	0.26	0.46	0.27	1.08	156	41
2021-06-03-23-48-57	2021	6	3	23	48	56.68	35.1549	25.2485	6.55	1.8	1	16.18	0.27	0.55	0.28	1.44	150	36
2021-06-04-00-18-13	2021	6	4	0	18	13.78	35.1535	25.2467	6.74	1.2	1	15.93	0.36	0.85	0.52	2.31	155	20
2021-06-04-01-05-26	2021	6	4	1	5	26.38	35.1648	25.2459	6.2	4.2	1	15.75	0.21	0.39	0.2	0.65	148	69
2021-06-04-01-58-45	2021	6	4	1	58	45.38	35.1561	25.2456	6.5	2.7	1	17.75	0.16	0.4	0.23	0.68	153	37
2021-06-04-02-15-21	2021	6	4	2	15	20.89	35.1521	25.2467	6.02	2.1	1	17.93	0.24	0.46	0.29	0.77	160	34
2021-06-04-02-27-33	2021	6	4	2	28	4.71	35.1563	25.2454	7	1.9	1	15.85	0.16	0.48	0.22	1.37	149	34
2021-06-04-04-04-42	2021	6	4	4	4	41.62	35.1571	25.2462	6.96	2.3	1	17.15	0.22	0.52	0.35	1.49	151	22
2021-06-04-18-09-11	2021	6	4	18	9	11.92	35.1575	25.247	6.9	2.3	1	17.92	0.49	0.7	0.45	2.59	152	36
2021-06-04-23-26-27	2021	6	4	23	26	28.5	35.1593	25.2506	10.37	1.5	1	16.11	0.09	0.5	0.41	1.84	149	14
2021-06-04-23-39-54	2021	6	4	23	40	19.96	35.148	25.2499	5.6	1.3	1	17.37	0.08	0.69	0.4	16.65	174	11
2021-06-05-03-39-15	2021	6	5	3	39	51.22	35.1522	25.2601	14.4	1.5	1	16.24	0.11	0.8	0.4	17.67	171	11
2021-06-05-23-49-01	2021	6	5	23	49	0.699997	35.1542	25.2485	5.99	1.9	1	18.3	0.43	0.76	0.41	1.52	153	33
2021-06-06-00-14-16	2021	6	6	0	14	16.52	35.1529	25.239	6.53	1.1	1	18.37	0.47	0.82	0.58	5.46	153	19
2021-06-06-05-32-16	2021	6	6	5	32	41.11	35.1534	25.2474	6.5	1.1	1	15.09	0.06	1.28	0.48	3.21	167	11
2021-06-06-07-01-23	2021	6	6	7	1	28.96	35.1563	25.2469	6.66	1.8	1	16.65	0.22	0.57	0.42	0.95	150	16
2021-06-06-08-27-50	2021	6	6	8	27	50.74	35.1623	25.2583	7	1.9	1	16.99	0.12	0.64	0.6	1.91	151	15
2021-06-06-10-29-53	2021	6	6	10	29	53.31	35.1576	25.2457	7	2.3	1	17.6	0.14	0.55	0.31	1.96	151	20
2021-06-06-12-52-13	2021	6	6	12	52	12.79	35.155	25.2471	6.41	2.1	1	17.76	0.22	0.58	0.27	1.76	153	23
2021-06-06-13-16-36	2021	6	6	13	16	38.89	35.1543	25.2501	6.01	2.3	1	19.57	0.46	0.69	0.37	1.77	156	36
2021-06-07-09-59-01	2021	6	7	9	59	5.22	35.1538	25.2497	6.09	1.7	1	14.18	0.11	1.37	0.47	2.43	145	12
2021-06-07-15-16-34	2021	6	7	15	16	34.14	35.1567	25.2457	6.77	2.2	1	18.35	0.17	0.43	0.26	0.79	153	28
2021-06-07-18-29-13	2021	6	7	18	29	13.68	35.1543	25.2494	6.56	1.4	1	17.05	0.15	1.02	0.41	3.72	151	13
2021-06-08-16-15-00	2021	6	8	16	14	59.62	35.1572	25.2608	6.74	2.8	1	17.45	0.19	0.45	0.24	1.14	151	33
2021-06-08-16-29-52	2021	6	8	16	29	52.01	35.1537	25.2524	5.78	2.5	1	18.93	0.14	0.37	0.22	0.63	154	31
2021-06-08-16-35-17	2021	6	8	16	35	16.94	35.1531	25.2563	6.33	3.1	1	17.61	0.22	0.45	0.24	0.88	151	47
2021-06-08-16-38-16	2021	6	8	16	38	16.86	35.1579	25.245	7.95	3.2	1	18.05	0.23	0.46	0.25	0.84	153	49
2021-06-08-16-40-32	2021	6	8	16	40	32.49	35.1556	25.2619	6.59	2.3	1	18.45	0.18	0.6	0.3	2.07	153	23
2021-06-08-16-51-21	2021	6	8	16	51	21.28	35.1589	25.2473	6.95	2.2	1	18.87	0.11	1.78	0.46	4.05	198	15
2021-06-08-17-54-39	2021	6	8	17	54	39.22	35.1575	25.2449	6.77	2.6	1	15.81	0.27	0.52	0.29	0.88	148	35
2021-06-08-18-15-50	2021	6	8	18	15	50.24	35.1536	25.248	7.03	2.2	1	17.53	0.26	0.66	0.37	1.73	152	21
2021-06-08-18-17-28	2021	6	8	18	17	28.5	35.1639	25.2409	9.18	2	1	17.15	0.2	0.57	0.39	1.74	151	19
2021-06-08-19-15-29	2021	6	8	19	16	13.78	35.1542	25.2561	6.39	1.3	1	18.08	0.14	0.61	0.29	2.27	153	18
2021-06-08-19-32-33	2021	6	8	19	32	33.36	35.148	25.2566	4.59	0.6	1	19.13	0.13	0.62	0.76	18.29	178	11
2021-06-08-19-48-07	2021	6	8	19	48	8.3	35.1589	25.247	7.25	1.6	1	17.58	0.19	0.52	0.35	0.91	151	22
2021-06-08-19-48-34	2021	6	8	19	48	35.52	35.1554	25.245	8.02	1.2	1	15.1	0.12	0.8	0.33	1.81	147	14
2021-06-08-19-49-12	2021	6	8	19	49	11.96	35.1514	25.2462	6.79	0.9	1	18.24	0.24	0.55	0.42	1.12	153	17
2021-06-08-20-34-23	2021	6	8	20	34	23.6	35.1542	25.2453	6.41	1.7	1	16.93	0.16	0.48	0.25	1.42	151	24
2021-06-08-21-25-00	2021	6	8	21	25	0.639999	35.153	25.257	6.13	2.5	1	19.05	0.16	0.49	0.27	0.8	155	32
2021-06-09-00-05-18	2021	6	9	0	5	37.79	35.17	25.2384	11.28	1.1	1	15.83	0.09	0.69	0.33	1.48	148	15
2021-06-09-02-36-29	2021	6	9	2	36	28.83	35.1402	25.2419	6.16	3.9	1	16.93	0.25	0.47	0.24	0.85	151	70
2021-06-09-06-00-21	2021	6	9	6	0	20.43	35.1597	25.255	12.33	2.3	1	19	0.17	0.52	0.29	0.79	154	22
2021-06-09-06-40-19	2021	6	9	6	40	19.94	35.1396	25.242	3.61	2.2	1	19.04	0.55	0.89	0.96	2.18	155	24
2021-06-09-20-46-00	2021	6	9	20	46	1.04	35.1613	25.2527	6.77	1.9	1	17.37	0.11	0.67	0.36	2.39	151	13
2021-06-09-21-28-25	2021	6	9	21	28	25.52	35.1559	25.2482	8.03	1.8	1	17.16	0.11	0.49	0.27	2.26	151	20
2021-06-10-01-52-38	2021	6	10	1	52	38.29	35.159	25.248	7.36	2.3	1	18.18	0.14	0.43	0.25	1.24	153	31
2021-06-10-03-02-26	2021	6	10	3	2	50.92	35.1803	25.2555	15.84	2	1	13.82	0.07	1.57	0.38	2.6	145	13
2021-06-11-01-31-00	2021	6	11	1	31	0.989998	35.1522	25.2491	6.43	1.8	1	17.24	0.28	0.74	0.43	2.13	152	16
2021-06-12-01-37-58	2021	6	12	1	38	33.5	35.17	25.2367	11.88	1.1	1	15.93	0.07	1.21	0.42	3.36	169	11
2021-06-12-07-04-18	2021	6	12	7	4	18.3	35.1474	25.2489	9.56	1.9	1	19.28	0.26	0.67	0.35	1.96	155	20
2021-06-12-22-47-44	2021	6	12	22	47	44.66	35.1537	25.2472	6.89	3.5	1	16.74	0.16	0.4	0.2	0.74	150	53
2021-06-13-01-29-57	2021	6	13	1	29	58.26	35.1567	25.244	6.53	1.7	1	16.69	0.19	0.86	0.34	1.53	150	20
2021-06-13-02-12-15	2021	6	13	2	12	59.76	35.1755	25.2434	13.16	1.1	1	16.14	0.08	1.51	0.53	4.99	176	11
2021-06-13-23-56-02	2021	6	13	23	56	29.56	35.1585	25.2476	8.55	1.3	1	17.19	0.15	0.68	0.38	5.78	152	12
2021-06-14-03-30-01	2021	6	14	3	30	2.14	35.1421	25.2571	5.51	1.7	1	16.77	0.09	0.67	0.46	2.11	150	14
2021-06-14-18-59-58	2021	6	14	19	0	24.88	35.1681	25.2499	12.05	1.3	1	11.74	0.06	1.57	0.6	2.55	157	11
2021-06-15-09-00-02	2021	6	15	9	1	0.0199966	35.1872	25.2646	16.93	1.4	1	12.67	0.11	1.1	0.54	0.91	160	12
2021-06-15-12-22-20	2021	6	15	12	22	20.23	35.1551	25.2476	7.9	3.4	1	17.13	0.21	0.45	0.23	1.12	151	46
2021-06-16-03-57-04	2021	6	16	3	57	4.83	35.1621	25.2449	11.83	1.2	1	14.66	0.08	1.36	0.48	3.04	171	11
2021-06-16-11-19-49	2021	6	16	11	20	30.21	35.1819	25.2533	14.72	2	1	10.84	0.13	1.81	0.49	2.32	139	14
2021-06-16-19-44-08	2021	6	16	19	45	2.12	35.1508	25.2466	5.23	1.3	1	13.68	0.03	0.82	0.48	13.7	163	11
2021-06-16-22-09-32	2021	6	16	22	9	35.94	35.1545	25.2458	7.21	1.7	1	14.12	0.12	1.16	0.44	2.22	146	12
2021-06-16-23-15-02	2021	6	16	23	15	35.56	35.1589	25.2693	15.43	1.1	1	16.63	0.09	0.86	1.41	7.6	260	11
2021-06-17-01-13-18	2021	6	17	1	13	18.04	35.1499	25.2463	4.57	1.8	1	18.07	0.14	0.45	0.22	1.04	153	32
2021-06-17-09-10-34	2021	6	17	9	10	34.45	35.1643	25.2463	11.85	2.2	1	16.89	0.17	0.47	0.29	1.15	150	21
2021-06-17-17-54-41	2021	6	17	17	54	41.32	35.1523	25.2561	5.88	2.2	1	19.37	0.23	0.68	0.49	2.56	156	27
2021-06-17-22-16-58	2021	6	17	22	16	58	35.1492	25.2439	6.78	0.8	1	17.66	0.16	1.62	0.53	16.56	174	11
2021-06-17-23-28-30	2021	6	17	23	28	30.84	35.1612	25.2347	4.29	1	1	18.02	0.12	0.86	0.58	18.07	176	11
2021-06-20-04-48-26	2021	6	20	4	49	6.43	35.1817	25.2365	14.24	1.7	1	16.58	0.14	0.62	0.33	1.35	150	15
2021-06-21-03-02-41	2021	6	21	3	2	41.02	35.164	25.2471	12.45	2.2	1	18.95	0.12	0.56	0.28	1.95	155	21
2021-06-21-03-55-24	2021	6	21	3	56	3.28	35.1565	25.2513	9.83	1.6	1	17.82	0.12	0.91	0.42	1.3	175	11
2021-06-21-11-58-25	2021	6	21	11	59	3.15	35.155	25.2489	6.24	1.8	1	15.67	0.21	0.67	0.38	2.97	149	17
2021-06-21-14-17-06	2021	6	21	14	17	29.51	35.1762	25.2488	13.43	1.2	1	14.11	0.09	1.5	0.48	3.56	165	11
2021-06-23-20-14-20	2021	6	23	20	14	19.6	35.1594	25.2477	6.61	2	1	18.72	0.11	0.42	0.28	0.73	154	23
2021-06-23-20-22-50	2021	6	23	20	22	49.8	35.1566	25.2477	6.86	2.6	1	18.66	0.13	0.42	0.22	1.02	154	33
2021-06-23-21-19-02	2021	6	23	21	19	29.54	35.1536	25.2473	5.93	1.1	1	18.09	0.15	1.11	0.69	20.29	176	11
2021-06-24-00-13-55	2021	6	24	0	14	36.03	35.1581	25.245	7.2	1.2	1	14.47	0.08	1.12	0.39	2.65	165	11
2021-06-24-02-59-07	2021	6	24	2	59	7.16	35.1495	25.2467	5.94	0.8	1	11.63	0.21	0.8	0.41	1.22	141	15
2021-06-24-21-29-29	2021	6	24	21	29	50.88	35.1563	25.2461	7.3	1.4	1	12.89	0.07	1.27	0.44	2.46	161	11
2021-06-24-23-39-53	2021	6	24	23	39	53.62	35.1557	25.246	6.94	1.8	1	18.23	0.21	0.52	0.3	2.23	153	20
2021-06-25-22-33-05	2021	6	25	22	33	5.62	35.1538	25.2487	6.31	1.9	1	18.04	0.41	0.72	0.53	2.21	153	24
2021-06-26-03-13-57	2021	6	26	3	13	57.25	35.1572	25.2441	6.75	2.1	1	17.25	0.27	0.67	0.43	1.2	152	19
2021-06-26-20-48-07	2021	6	26	20	48	7.9	35.1582	25.2456	7.85	1.3	1	16.15	0.06	1.2	0.47	3.98	171	11
2021-06-27-01-38-34	2021	6	27	1	38	43.32	35.153	25.2444	9.85	1.5	1	14.66	0.08	1.32	0.65	2.42	154	12
2021-06-27-15-41-17	2021	6	27	15	42	6.38	35.1654	25.2456	11.52	1.6	1	12.36	0.08	2.01	0.56	3.1	159	11
2021-06-27-20-45-47	2021	6	27	20	45	46.84	35.1546	25.2513	7.55	2	1	17.46	0.13	0.48	0.32	1.71	152	18
2021-06-27-22-19-40	2021	6	27	22	19	39.9	35.1543	25.2495	6.31	2.5	1	17.41	0.09	0.43	0.28	0.92	159	18
2021-06-27-23-12-28	2021	6	27	23	12	29.12	35.1658	25.2406	10.18	1.6	1	13	0.12	1.1	0.62	2.01	144	13
2021-06-28-00-34-03	2021	6	28	0	34	11.4	35.1475	25.2324	3.81	1.4	1	16	0.1	1.26	0.43	3.75	170	11
2021-06-28-02-52-34	2021	6	28	2	52	33.55	35.1736	25.2412	12.75	1.9	1	16.62	0.08	0.59	0.34	1.22	172	14
2021-06-30-01-49-43	2021	6	30	1	49	43.73	35.1762	25.2429	14.21	1.3	1	15.42	0.17	0.6	0.34	1.64	148	17
2021-07-01-02-41-47	2021	7	1	2	41	46.6	35.1542	25.2502	5.75	2.3	1	17.46	0.17	0.36	0.2	1.05	152	43
2021-07-01-20-04-13	2021	7	1	20	4	13.32	35.1697	25.2591	12.65	0.5	1	11.55	0.29	0.7	0.5	1.04	144	17
2021-07-01-20-57-47	2021	7	1	20	57	47.62	35.1521	25.2484	6.14	1.6	1	14.32	0.17	0.74	0.39	1.62	146	15
2021-07-01-21-12-22	2021	7	1	21	12	21.98	35.1526	25.2436	6.54	1.8	1	16.78	0.22	0.56	0.29	1.39	150	28
2021-07-02-04-23-03	2021	7	2	4	23	2.9	35.1591	25.2461	7.53	2.7	1	17.39	0.21	0.46	0.26	0.98	152	32
2021-07-02-05-35-24	2021	7	2	5	35	43.5	35.1537	25.2438	5.64	1.8	1	10.53	0.09	1.95	0.63	2.62	154	11
2021-07-02-07-50-02	2021	7	2	7	50	2.34	35.1613	25.2438	10.41	2	1	17.34	0.16	0.56	0.36	2.09	152	20
2021-07-02-15-59-24	2021	7	2	15	59	37.36	35.1592	25.2453	11.29	2	1	16.94	0.07	3.12	0.97	10.34	173	11
2021-07-02-19-45-12	2021	7	2	19	46	8.3	35.1691	25.2427	13.64	4.1	1	16.39	0.21	0.33	0.19	0.74	150	70
2021-07-02-20-03-53	2021	7	2	20	4	27.9	35.1519	25.2433	5.99	1.7	1	17	0.06	1.17	0.41	3.69	173	11
2021-07-02-20-29-25	2021	7	2	20	30	7.16	35.1565	25.2458	9.22	3.5	1	16.92	0.37	0.39	0.25	0.67	151	85
2021-07-02-21-05-49	2021	7	2	21	5	50.12	35.1646	25.2452	10.93	1.6	1	15.8	0.04	1.09	0.4	3.1	169	11
2021-07-02-21-11-20	2021	7	2	21	11	35.24	35.1545	25.2456	6.61	1.3	1	15.25	0.08	1.35	0.49	3.22	168	11
2021-07-02-21-14-05	2021	7	2	21	14	6.16	35.1536	25.2423	5.61	1.3	1	18.33	0.3	1.1	0.66	28.84	176	11
2021-07-02-22-31-07	2021	7	2	22	31	7.68	35.1539	25.2458	6.67	1.8	1	16.5	0.15	0.87	0.42	5.84	150	12
2021-07-03-00-12-32	2021	7	3	0	12	32.01	35.1563	25.2456	5.36	1.7	1	18.86	0.39	0.91	0.51	2.4	155	19
2021-07-03-03-58-06	2021	7	3	3	58	5.87	35.1667	25.2528	12.83	1.4	1	13.67	0.08	1.53	0.51	2.78	164	11
2021-07-03-14-38-22	2021	7	3	14	39	4.67	35.1519	25.2489	7.73	1.9	1	14.3	0.06	1.08	0.42	2.68	165	11
2021-07-03-23-03-50	2021	7	3	23	4	0.800003	35.1567	25.2481	7.63	1.2	1	17.44	0.08	1.06	0.41	4.86	174	11
2021-07-04-09-50-10	2021	7	4	9	50	9.55	35.1586	25.2462	7.67	2.4	1	16.73	0.11	0.42	0.25	1.16	150	23
2021-07-04-13-14-57	2021	7	4	13	14	57.78	35.2667	25.2267	20.75	1.4	1	7.42	0.13	1.09	1.26	0.78	225	15
2021-07-05-02-34-35	2021	7	5	2	34	35.75	35.1503	25.2414	7.08	2.4	1	22.53	0.11	0.53	0.29	0.87	158	23
2021-07-05-07-27-25	2021	7	5	7	27	26.02	35.1578	25.2512	9.41	2.2	1	23.23	0.12	0.7	0.35	4.51	158	13
2021-07-05-10-07-45	2021	7	5	10	7	50.76	35.1551	25.2473	6.84	2.3	1	17.52	0.25	0.8	0.45	2.13	152	16
2021-07-05-20-40-30	2021	7	5	20	40	30.48	35.1606	25.2433	10.55	4.2	1	17.23	0.25	0.43	0.23	0.77	152	74
2021-07-05-20-59-32	2021	7	5	20	59	57	35.1892	25.2395	16.78	1.7	1	13.64	0.12	0.84	0.31	1.57	144	14
2021-07-05-22-14-38	2021	7	5	22	14	38.2	35.1553	25.2469	7.72	1.9	1	16.47	0.12	0.8	0.35	1.95	150	13
2021-07-05-22-19-33	2021	7	5	22	19	33.68	35.1502	25.2503	5.64	1.2	1	17.12	0.16	0.59	0.37	3.71	152	15
2021-07-05-22-19-54	2021	7	5	22	19	56.36	35.1539	25.2473	7.14	2.6	1	17.6	0.12	0.5	0.26	1.98	152	25
2021-07-05-22-53-54	2021	7	5	22	54	33	35.159	25.2492	9.44	1.2	1	16.91	0.09	0.69	0.37	2.04	157	13
2021-07-05-23-24-53	2021	7	5	23	24	53.28	35.1573	25.2487	7.36	1.4	1	14.67	0.11	1.05	0.45	2.21	153	12
2021-07-06-00-23-12	2021	7	6	0	23	20.54	35.1587	25.245	8.31	1.2	1	15.33	0.08	1.14	0.43	3.1	168	11
2021-07-06-00-48-24	2021	7	6	0	48	32.99	35.1557	25.2457	8.01	1.2	1	17.58	0.11	0.82	0.35	1.26	158	13
2021-07-06-06-27-21	2021	7	6	6	27	56.43	35.1526	25.2344	6.37	1.9	1	17.85	0.17	0.48	0.25	1.75	152	27
2021-07-06-08-15-05	2021	7	6	8	15	5.5	35.1542	25.2442	7.1	2.8	1	17.36	0.23	0.48	0.3	1.66	152	39
2021-07-06-16-42-17	2021	7	6	16	42	18.39	35.1694	25.2448	11.88	2	1	17.03	0.14	0.51	0.32	1.42	151	18
2021-07-06-20-08-38	2021	7	6	20	8	39.3	35.1653	25.2388	6.62	1.3	1	16.05	0.22	0.75	0.34	1.96	149	19
2021-07-06-22-07-29	2021	7	6	22	7	28.04	35.1583	25.2476	5.75	2.2	1	18.37	0.24	0.6	0.28	1.39	153	31
2021-07-06-23-02-17	2021	7	6	23	2	17.92	35.1612	25.2434	7.45	1.9	1	18.02	0.25	0.58	0.33	1.47	153	28
2021-07-07-02-52-08	2021	7	7	2	52	8.7	35.1567	25.2458	6.24	2.1	1	19.02	0.22	0.57	0.29	1.36	155	31
2021-07-07-02-53-14	2021	7	7	2	53	15.02	35.1678	25.2442	13.13	1.8	1	16.78	0.13	0.5	0.26	1.63	151	25
2021-07-07-02-54-39	2021	7	7	2	54	50.97	35.1547	25.2448	6.72	1.9	1	18.15	0.2	0.58	0.38	1.54	153	24
2021-07-07-03-27-27	2021	7	7	3	27	37.47	35.1628	25.2478	14.62	1.5	1	14.21	0.1	1.11	1.41	3.07	253	11
2021-07-07-21-40-10	2021	7	7	21	40	10.62	35.1563	25.2462	6.42	1.3	1	17.55	0.11	0.58	0.36	13.67	152	13
2021-07-08-00-59-27	2021	7	8	0	59	26.81	35.153	25.2482	5.88	2.5	1	16.94	0.19	0.59	0.33	1.82	151	26
2021-07-08-09-58-09	2021	7	8	9	58	9.24	35.1552	25.2482	6.7	2.5	1	17.16	0.19	0.64	0.32	1.88	152	28
2021-07-08-12-23-52	2021	7	8	12	24	44.15	35.1557	25.243	5.82	1.8	1	16.67	0.1	0.58	0.44	1.67	150	14
2021-07-08-16-46-51	2021	7	8	16	46	50.57	35.1602	25.2442	6.95	2.3	1	11.03	0.22	0.73	0.37	0.55	144	22
2021-07-08-17-40-24	2021	7	8	17	40	24.42	35.1606	25.2441	9.07	2.3	1	17.99	0.22	0.47	0.3	1.06	162	24
2021-07-08-19-15-06	2021	7	8	19	15	50.96	35.1578	25.2472	6.52	1.5	1	17.11	0.13	1.28	0.46	3.9	173	11
2021-07-08-21-05-27	2021	7	8	21	5	54.78	35.1564	25.2457	7.24	1.6	1	14.94	0.05	1.26	0.42	2.74	167	11
2021-07-08-21-39-13	2021	7	8	21	39	13.48	35.1606	25.2375	9.01	2.2	1	17.94	0.17	0.49	0.32	1.34	152	26
2021-07-09-02-43-42	2021	7	9	2	44	25.18	35.1562	25.2438	8.04	2.1	1	15.7	0.17	0.67	0.37	2.86	149	18
2021-07-09-20-33-26	2021	7	9	20	34	4.32	35.1733	25.2373	15.32	1.4	1	15.61	0.06	1.26	0.48	3.14	169	11
2021-07-10-00-37-10	2021	7	10	0	38	9.25	35.1648	25.2351	14.13	2	1	17.31	0.08	1.13	0.4	3.05	152	12
2021-07-10-01-07-07	2021	7	10	1	7	7.26	35.1481	25.249	4.44	1.1	1	18.11	0.15	0.62	0.4	2.98	176	12
2021-07-10-01-36-48	2021	7	10	1	36	48.81	35.1584	25.2439	6.42	2.2	1	17.82	0.28	0.51	0.31	0.84	152	31
2021-07-10-01-53-24	2021	7	10	1	53	23.9	35.1611	25.2481	10.49	3.4	1	16.69	0.17	0.33	0.2	0.75	151	99
2021-07-10-03-35-42	2021	7	10	3	35	42.64	35.1534	25.2414	5.67	2.2	1	18.82	0.48	0.68	0.44	1.91	155	30
2021-07-10-13-32-22	2021	7	10	13	32	32.23	35.1565	25.2596	10.34	1.9	1	17.71	0.1	4.67	0.43	13.74	175	11
2021-07-10-14-42-26	2021	7	10	14	42	26.28	35.1518	25.2396	6.51	2.9	1	17.98	0.16	0.45	0.24	1.38	153	31
2021-07-10-14-49-16	2021	7	10	14	49	53.99	35.157	25.2444	7.29	2	1	16.65	0.14	1.28	0.35	3.66	157	18
2021-07-11-05-45-19	2021	7	11	5	45	19.56	35.1679	25.2439	12.72	2.4	1	16.88	0.19	0.46	0.3	0.97	151	30
2021-07-11-08-39-08	2021	7	11	8	39	12.98	35.1544	25.247	6.84	3	1	16.09	0.26	0.39	0.26	0.72	149	43
2021-07-11-12-28-43	2021	7	11	12	28	43.26	35.1556	25.245	9.23	2.3	1	16.36	0.16	0.71	0.37	1.11	150	14
2021-07-12-00-17-51	2021	7	12	0	17	51.33	35.1525	25.2405	6.94	2.3	1	17.99	0.15	0.51	0.39	1.59	153	21
2021-07-12-00-36-31	2021	7	12	0	36	47.97	35.18	25.2517	10.1	1.2	1	13.34	0.09	5.37	0.43	13.61	162	11
2021-07-12-07-06-09	2021	7	12	7	6	58.73	35.1664	25.2428	12.57	1.9	1	15.2	0.11	1.28	0.45	3.51	167	11
2021-07-12-16-27-51	2021	7	12	16	27	51.36	35.1559	25.2494	7.24	2.8	1	17.78	0.26	0.5	0.3	0.96	152	36
2021-07-12-16-31-40	2021	7	12	16	32	6.32	35.1565	25.2458	7.68	2.2	1	16.95	0.19	0.48	0.35	1.27	151	23
2021-07-13-02-35-08	2021	7	13	2	35	8.44	35.1523	25.239	6.72	3	1	17.3	0.18	0.41	0.24	1.19	152	35
2021-07-13-02-48-48	2021	7	13	2	48	48.63	35.153	25.2436	7.03	2.7	1	17.42	0.19	0.33	0.2	0.66	152	51
2021-07-13-03-34-47	2021	7	13	3	35	16.36	35.151	25.2362	7.82	3.5	1	16.72	0.26	0.43	0.27	1.24	151	48
2021-07-13-06-38-02	2021	7	13	6	38	2.87	35.1499	25.2374	6.56	2.1	1	16.37	0.23	0.52	0.3	1.13	150	23
2021-07-13-06-40-19	2021	7	13	6	40	18.7	35.151	25.2377	6.87	3.2	1	17.27	0.17	0.34	0.23	0.62	151	54
2021-07-13-18-41-09	2021	7	13	18	41	39.56	35.156	25.2358	9.4	1.5	1	14.46	0.04	1.14	0.44	2.92	165	11
2021-07-13-22-22-57	2021	7	13	22	22	57.56	35.1508	25.2406	6.88	2.8	1	18.35	0.13	0.4	0.24	1.13	154	35
2021-07-13-22-43-59	2021	7	13	22	43	58.92	35.1499	25.2415	8.32	3	1	18.54	0.14	0.35	0.21	0.96	154	42
2021-07-13-23-27-23	2021	7	13	23	27	22.4	35.1533	25.242	6.91	2	1	17.5	0.11	0.46	0.35	1.03	152	21
2021-07-14-02-44-51	2021	7	14	2	45	40.51	35.1513	25.2384	6	2.2	1	17.7	0.13	0.48	0.38	1.33	152	23
2021-07-14-22-13-21	2021	7	14	22	14	17.64	35.1547	25.2428	12.26	1.4	1	14.94	0.07	1.26	0.47	3.04	167	11
2021-07-15-05-36-51	2021	7	15	5	37	7.88	35.1579	25.2468	8.69	1.7	1	13.19	0.08	1.22	0.44	2.69	162	11
2021-07-16-09-34-02	2021	7	16	9	34	2.58	35.1544	25.2377	6.28	2.2	1	17.49	0.15	0.43	0.28	0.74	152	23
2021-07-16-16-58-38	2021	7	16	16	58	40.6	35.1482	25.2421	7.37	2.4	1	18.08	0.2	0.52	0.26	1.17	154	32
2021-07-16-20-54-12	2021	7	16	20	54	11.88	35.162	25.2456	8.37	3.1	1	17.95	0.19	0.35	0.2	0.67	153	68
2021-07-16-20-56-03	2021	7	16	20	56	4.44	35.1648	25.2414	11.54	2.4	1	16.92	0.2	0.39	0.25	0.92	150	35
2021-07-16-20-59-14	2021	7	16	20	59	14.54	35.1692	25.2437	13.11	1.4	1	16.66	0.2	0.59	0.44	2.03	150	15
2021-07-16-21-01-52	2021	7	16	21	1	52.54	35.1585	25.244	7.15	1.9	1	17.56	0.24	0.49	0.33	0.91	152	25
2021-07-16-21-21-22	2021	7	16	21	21	22.6	35.1596	25.2428	14.21	1.3	1	16.58	0.19	0.65	0.38	1.51	150	14
2021-07-16-21-25-06	2021	7	16	21	25	6.6	35.1677	25.2468	12.09	2.2	1	17.01	0.15	0.45	0.26	0.89	151	29
2021-07-18-04-21-00	2021	7	18	4	21	0.0100021	35.1512	25.242	6.97	2.9	1	18.36	0.15	0.38	0.21	0.98	154	36
2021-07-18-04-27-38	2021	7	18	4	27	47.24	35.1593	25.2421	11.19	1.5	1	15.82	0.11	0.63	0.4	2.04	169	12
2021-07-18-04-56-53	2021	7	18	4	56	54.18	35.1508	25.241	6.42	3.9	1	16.95	0.23	0.4	0.24	1.13	151	64
2021-07-18-05-40-06	2021	7	18	5	40	6.56	35.1542	25.2479	6.66	2.9	1	17.91	0.17	0.37	0.24	1.04	152	37
2021-07-18-06-27-17	2021	7	18	6	27	17.52	35.1578	25.2455	7.69	3	1	17.89	0.18	0.37	0.22	0.7	153	43
2021-07-18-12-54-40	2021	7	18	12	54	40.53	35.1436	25.2457	6.73	2.1	1	18.92	0.16	0.45	0.31	1.4	155	22
2021-07-18-14-19-09	2021	7	18	14	19	20.73	35.1505	25.2385	6.19	2.5	1	17.66	0.19	0.39	0.23	0.79	152	37
2021-07-18-14-36-53	2021	7	18	14	36	53.34	35.1537	25.2477	5.65	1.1	1	17.16	0.22	0.61	0.44	1.74	152	16
2021-07-18-14-38-54	2021	7	18	14	38	54.41	35.1743	25.246	16.14	1.3	1	15.77	0.18	0.57	0.37	1.42	149	16
2021-07-18-15-14-50	2021	7	18	15	14	50.06	35.1513	25.2415	6.66	2.3	1	18.5	0.11	0.64	0.37	1.86	154	14
2021-07-18-17-50-45	2021	7	18	17	51	22.04	35.1687	25.2377	15.38	1.7	1	15.7	0.04	1.78	0.52	3.53	169	11
2021-07-18-18-36-43	2021	7	18	18	36	43.48	35.1537	25.2469	6.85	3.1	1	17.32	0.18	0.35	0.21	0.94	152	63
2021-07-18-21-50-29	2021	7	18	21	51	11.68	35.1445	25.2406	8.06	2.1	1	16.05	0.24	0.55	0.31	1.22	149	27
2021-07-18-22-12-50	2021	7	18	22	12	38.72	35.1452	25.2383	7.58	2.6	1	18.45	0.18	0.48	0.3	1.3	153	24
2021-07-18-22-21-38	2021	7	18	22	21	38.88	35.1982	25.241	19.31	1.2	1	15.37	0.15	0.53	0.4	1.06	148	16
2021-07-18-22-23-12	2021	7	18	22	23	12.9	35.1392	25.2418	5.65	1.5	1	17.77	0.21	0.64	0.36	2.65	152	18
2021-07-19-00-04-50	2021	7	19	0	4	50.68	35.1508	25.2416	7.07	1.7	1	17.14	0.18	0.7	0.39	1.89	151	13
2021-07-19-00-57-58	2021	7	19	0	57	58.77	35.1502	25.2394	6.87	2.1	1	18.07	0.14	0.65	0.34	1.69	153	15
2021-07-19-05-58-07	2021	7	19	5	58	7.46	35.1506	25.24	5.71	2.7	1	17.81	0.2	0.42	0.24	0.82	153	36
2021-07-19-08-13-59	2021	7	19	8	14	13.86	35.149	25.2426	6.53	2	1	17.62	0.18	0.78	0.43	2.3	152	12
2021-07-19-09-12-27	2021	7	19	9	12	27	35.154	25.2462	5.65	3	1	17.38	0.18	0.46	0.22	0.87	152	39
2021-07-19-09-15-15	2021	7	19	9	15	28.2	35.1623	25.2479	11.12	2	1	15.23	0.08	1.35	0.4	3.08	167	11
2021-07-19-16-22-08	2021	7	19	16	22	9.19	35.1577	25.2362	7.75	1.8	1	16.62	0.14	0.89	0.44	2.79	151	12
2021-07-19-18-23-33	2021	7	19	18	23	33.7	35.157	25.2428	6.79	3	1	18.28	0.15	0.37	0.23	1.02	153	34
2021-07-19-18-34-31	2021	7	19	18	34	31.22	35.1494	25.2435	6.65	2.1	1	17.74	0.12	0.75	0.53	2.58	152	14
2021-07-20-00-24-49	2021	7	20	0	25	15.33	35.1711	25.2372	14.29	0.8	1	16.42	0.08	1.77	0.57	4.25	171	11
2021-07-20-01-27-38	2021	7	20	1	28	2.04	35.1667	25.2283	9.92	1.2	1	12.67	0.18	1.28	1.62	3.76	247	11
2021-07-20-15-36-11	2021	7	20	15	36	24.56	35.1378	25.2483	6.13	2.3	1	24.69	0.13	0.83	0.37	2.96	135	12
2021-07-20-17-43-13	2021	7	20	17	44	15.64	35.1489	25.2324	6.84	4.1	1	17.36	0.27	0.39	0.24	1.12	125	84
2021-07-20-18-38-31	2021	7	20	18	38	34.04	35.1454	25.2369	5.3	1.3	1	16.52	0.07	0.71	0.47	2.84	123	11
2021-07-20-19-33-00	2021	7	20	19	32	59.92	35.1487	25.2505	5.71	2.5	1	18.01	0.16	0.42	0.22	0.86	125	40
2021-07-20-22-01-52	2021	7	20	22	1	52.2	35.1533	25.2478	6.24	1.6	1	16.76	0.27	0.74	0.33	2.41	119	18
2021-07-21-00-47-33	2021	7	21	0	47	41.34	35.1482	25.2471	4.92	1.3	1	17.21	0.17	0.57	0.29	3.79	124	16
2021-07-21-08-08-40	2021	7	21	8	8	40.22	35.1574	25.2452	6.57	2.3	1	18	0.18	0.52	0.35	3.29	125	16
2021-07-22-01-14-05	2021	7	22	1	14	3.42	35.1773	25.2733	23.26	1.1	1	16.8	0.05	1.22	0.73	4.01	116	11
2021-07-22-06-50-40	2021	7	22	6	50	54.75	35.1465	25.233	5.33	1.9	1	18.84	0.13	0.61	0.32	2.97	130	14
2021-07-22-15-47-33	2021	7	22	15	47	33.32	35.1522	25.2468	5.22	3.4	1	16.98	0.14	0.36	0.2	1.2	123	51
2021-07-22-17-10-23	2021	7	22	17	10	23	35.1524	25.2415	5.68	3.3	1	26.17	0.2	0.53	0.26	1.24	158	33
2021-07-22-21-53-49	2021	7	22	21	54	15.86	35.1445	25.2356	5.32	1.5	1	18.77	0.09	0.56	0.36	5.44	130	12
2021-07-23-08-16-48	2021	7	23	8	16	47.71	35.1422	25.2524	4.69	2.5	1	17.24	0.21	0.52	0.28	1.4	121	28
2021-07-24-01-58-46	2021	7	24	1	59	51.13	35.1593	25.2473	6.48	1.7	1	17.99	0.11	0.74	0.38	1.38	123	11
2021-07-24-02-07-37	2021	7	24	2	7	37.64	35.1501	25.2386	6.35	4.8	1	17.86	0.24	0.3	0.21	0.72	126	124
2021-07-24-02-18-51	2021	7	24	2	18	52.04	35.1643	25.2423	9.4	1.9	1	16.65	0.1	0.57	0.37	2.51	121	13
2021-07-24-02-32-52	2021	7	24	2	32	52.78	35.1566	25.2456	8.29	3.6	1	18.27	0.23	0.45	0.28	1.13	126	43
2021-07-24-02-48-10	2021	7	24	2	48	18.59	35.153	25.2432	9.22	2.3	1	16.09	0.24	0.54	0.25	0.64	119	34
2021-07-24-03-04-47	2021	7	24	3	4	47.35	35.1469	25.2326	7	3	1	18.02	0.14	0.37	0.25	0.7	127	24
2021-07-24-03-27-41	2021	7	24	3	27	42.13	35.1571	25.2453	6.12	1.8	1	16.85	0.07	0.57	0.38	4.08	120	11
2021-07-24-04-16-19	2021	7	24	4	16	18.98	35.1524	25.2438	5.5	3	1	17.83	0.18	0.4	0.24	1.38	124	28
2021-07-24-04-23-20	2021	7	24	4	23	20.17	35.1584	25.2519	7.66	2.4	1	18.52	0.32	0.6	0.43	1.29	126	17
2021-07-24-04-31-53	2021	7	24	4	32	8.04	35.1473	25.2419	7.07	2.1	1	17.86	0.18	0.68	0.43	2.11	125	12
2021-07-24-04-58-00	2021	7	24	4	58	54.7	35.1653	25.2375	13.7	2.1	1	17.65	0.05	0.55	0.36	2.95	125	11
2021-07-24-05-09-06	2021	7	24	5	9	5.91	35.1608	25.2404	7.46	3	1	17.63	0.16	0.45	0.23	1.11	125	28
2021-07-24-05-52-57	2021	7	24	5	54	0.870003	35.1618	25.2341	5.44	2.1	1	16.74	0.09	0.6	0.29	0.82	123	15
2021-07-24-06-05-30	2021	7	24	6	6	5.86	35.1703	25.251	18.86	1.9	1	34.42	0.03	1.04	0.41	3.38	167	11
2021-07-24-06-35-34	2021	7	24	6	36	12.9	35.1545	25.244	5.65	2.8	1	17.29	0.12	0.43	0.26	1.25	123	25
2021-07-24-07-38-30	2021	7	24	7	38	30.78	35.1554	25.2479	6.75	2.4	1	18.79	0.12	0.6	0.33	1.67	129	13
2021-07-24-07-57-12	2021	7	24	7	57	12.64	35.1594	25.2414	7.96	2.1	1	16.72	0.06	0.56	0.37	2.67	122	11
2021-07-24-10-36-08	2021	7	24	10	36	47.61	35.1531	25.2343	5.16	2.1	1	18.02	0.1	0.63	0.41	14.89	125	11
2021-07-24-10-48-12	2021	7	24	10	48	12.07	35.1519	25.2361	5.3	2.6	1	17.46	0.1	0.39	0.31	0.78	125	20
2021-07-24-12-37-20	2021	7	24	12	37	23.7	35.1529	25.2375	8.03	2.2	1	16.72	0.23	0.48	0.29	1.44	122	32
2021-07-24-14-01-56	2021	7	24	14	1	57.76	35.1555	25.2392	6.28	1.9	1	17.14	0.25	0.87	0.42	2.17	124	14
2021-07-24-14-08-57	2021	7	24	14	8	57.74	35.1518	25.2406	8.03	2.2	1	16.58	0.08	0.6	0.39	2.43	121	11
2021-07-24-14-25-04	2021	7	24	14	25	3.89	35.1527	25.2409	6.04	2.6	1	17.66	0.16	0.4	0.21	1.01	125	38
2021-07-24-15-57-07	2021	7	24	15	58	0.300003	35.1494	25.2311	7.81	1.9	1	17.51	0.12	0.59	0.39	14.74	126	11
2021-07-24-16-09-26	2021	7	24	16	9	55.88	35.1519	25.2417	6.29	2.2	1	16.67	0.08	0.6	0.39	2.43	121	11
2021-07-24-16-12-58	2021	7	24	16	13	17.21	35.1576	25.2464	10.46	2.1	1	15.98	0.08	1.12	0.73	3.88	147	11
2021-07-24-16-17-35	2021	7	24	16	18	2.39	35.1554	25.2415	7.13	2.2	1	14.85	0.06	1.11	0.41	2.85	167	11
2021-07-24-16-21-38	2021	7	24	16	21	37.6	35.1577	25.2396	6.69	2.4	1	17.37	0.09	0.52	0.35	1.07	124	12
2021-07-24-16-22-43	2021	7	24	16	23	12.87	35.1596	25.24	7.82	3.4	1	17.73	0.18	0.35	0.2	0.6	126	53
2021-07-24-18-29-28	2021	7	24	18	29	27.96	35.1574	25.2396	6.54	2.4	1	18.02	0.13	0.6	0.38	1.76	127	14
2021-07-24-19-40-30	2021	7	24	19	41	1.36	35.1551	25.2422	5.97	1.8	1	16.95	0.08	0.6	0.39	2.37	121	11
2021-07-24-19-44-19	2021	7	24	19	44	19.72	35.1503	25.2398	6.47	1.8	1	19.19	0.13	0.61	0.38	1.85	130	12
2021-07-24-19-46-24	2021	7	24	19	46	23.78	35.1482	25.241	6.19	2.9	1	18.2	0.33	0.5	0.29	1.43	126	42
2021-07-24-19-54-55	2021	7	24	19	55	12.56	35.1541	25.2455	5.7	1.9	1	17.36	0.15	0.58	0.36	5.66	123	12
2021-07-24-20-44-45	2021	7	24	20	45	12.04	35.1587	25.2405	6.21	1.7	1	16.76	0.06	0.59	0.38	2.41	122	11
2021-07-24-21-18-37	2021	7	24	21	18	37.66	35.1538	25.2417	6.07	3.1	1	18.12	0.28	0.42	0.26	0.75	127	42
2021-07-24-21-48-44	2021	7	24	21	48	44.32	35.1568	25.2418	7.58	2.5	1	17.93	0.12	0.42	0.23	1.08	127	25
2021-07-24-21-56-55	2021	7	24	21	56	55.32	35.1518	25.2395	7.25	3.7	1	17.37	0.23	0.33	0.22	0.64	125	56
2021-07-24-22-11-37	2021	7	24	22	11	37.68	35.1506	25.25	5.64	2.3	1	18.08	0.12	0.62	0.39	1.97	124	13
2021-07-24-22-12-31	2021	7	24	22	12	32.2	35.1543	25.2424	9.37	2.8	1	18.02	0.25	0.63	0.4	1.6	127	17
2021-07-24-22-25-52	2021	7	24	22	25	52.8	35.1542	25.2407	5.86	1.8	1	17.9	0.13	0.63	0.42	2.02	127	12
2021-07-24-23-35-38	2021	7	24	23	35	38.78	35.1572	25.2456	8.1	1.5	1	17.21	0.09	0.58	0.38	6.96	123	11
2021-07-25-00-17-57	2021	7	25	0	17	57.06	35.1548	25.2447	5.85	2.6	1	17.05	0.14	0.42	0.25	1.2	122	30
2021-07-25-00-24-41	2021	7	25	0	24	41.35	35.1552	25.2453	6.41	1.7	1	16.3	0.11	0.62	0.41	3.45	119	11
2021-07-25-01-19-18	2021	7	25	1	19	18.66	35.1575	25.2435	5.92	2	1	17.22	0.06	0.52	0.35	1.48	121	11
2021-07-25-03-15-19	2021	7	25	3	15	42.21	35.1559	25.2452	5.93	1.8	1	16.86	0.07	0.56	0.39	1.56	119	11
2021-07-25-03-59-45	2021	7	25	3	59	52.85	35.1508	25.2415	5.86	3.1	1	16.52	0.17	0.5	0.29	1.49	119	26
2021-07-25-04-16-09	2021	7	25	4	17	10.49	35.1591	25.24	7.09	1.7	1	16.46	0.09	0.69	0.41	4.56	121	11
2021-07-25-04-43-47	2021	7	25	4	43	48.44	35.1563	25.2438	9.27	2.3	1	17.02	0.1	0.53	0.31	1.32	123	18
2021-07-25-05-26-30	2021	7	25	5	26	52.53	35.1563	25.2461	6.04	2.1	1	16.88	0.11	0.55	0.32	1.64	121	16
2021-07-25-05-47-24	2021	7	25	5	47	23.99	35.1629	25.2398	10.07	2.4	1	17.02	0.15	0.5	0.3	2.87	123	18
2021-07-25-05-49-09	2021	7	25	5	49	40.01	35.1612	25.239	9.21	1.7	1	18.09	0.09	0.65	0.41	17.6	127	11
2021-07-25-06-37-08	2021	7	25	6	37	34.64	35.1596	25.2425	9.24	2	1	16.33	0.08	0.58	0.39	2.12	121	11
2021-07-25-11-10-53	2021	7	25	11	11	49.76	35.151	25.2419	5.83	1.7	1	16.84	0.08	0.58	0.38	3.41	122	11
2021-07-25-11-19-10	2021	7	25	11	19	12.54	35.1505	25.2438	4.89	1.8	1	16.15	0.09	0.6	0.39	3.62	119	11
2021-07-25-11-42-29	2021	7	25	11	43	0.870003	35.1605	25.2501	9.44	1.8	1	16.11	0.15	0.72	0.51	2.91	114	11
2021-07-25-11-55-34	2021	7	25	11	55	59.57	35.1542	25.2397	6.51	2.1	1	17.05	0.08	0.78	0.38	2.33	124	11
2021-07-25-16-14-28	2021	7	25	16	15	9.4	35.1579	25.2394	7.59	1.9	1	16.35	0.11	0.59	0.4	3.33	121	11
2021-07-25-19-33-53	2021	7	25	19	33	53.88	35.1542	25.2488	7.88	3	1	17.9	0.12	0.46	0.26	1.07	124	25
2021-07-25-22-34-31	2021	7	25	22	34	30.44	35.1475	25.2454	5.79	2	1	18.03	0.12	0.52	0.33	0.99	125	13
2021-07-25-22-41-50	2021	7	25	22	42	21.74	35.1482	25.246	5.68	1.4	1	16.82	0.19	0.82	0.54	3.61	120	11
2021-07-25-22-59-44	2021	7	25	23	0	9.64	35.151	25.2302	8.73	1.6	1	14.04	0.05	1.28	0.42	2.96	165	11
2021-07-25-23-04-53	2021	7	25	23	4	52.72	35.1574	25.2402	7.75	2.2	1	17.06	0.11	0.46	0.24	0.86	123	24
2021-07-25-23-06-53	2021	7	25	23	6	53.18	35.1586	25.2397	6.51	2.3	1	16.58	0.23	0.55	0.28	0.83	121	28
2021-07-25-23-27-52	2021	7	25	23	27	52.84	35.1624	25.2404	9.93	2.2	1	16.74	0.14	0.45	0.26	0.81	121	27
2021-07-26-02-02-30	2021	7	26	2	3	14.84	35.1636	25.2464	11.88	1.4	1	16.57	0.07	0.71	0.39	2.65	121	11
2021-07-26-04-29-47	2021	7	26	4	30	3.44	35.1582	25.2413	7.05	1.8	1	16.64	0.07	0.59	0.4	2.35	122	11
2021-07-26-07-15-50	2021	7	26	7	15	50.27	35.1588	25.2367	11.68	2.7	1	24.3	0.17	0.59	0.27	1.16	157	29
2021-07-26-10-17-05	2021	7	26	10	17	4.42	35.1494	25.2491	5.61	2.3	1	17.22	0.23	0.53	0.29	1.32	120	29
2021-07-26-12-53-52	2021	7	26	12	53	52.94	35.1571	25.2471	7.67	1.7	1	18.02	0.11	0.59	0.39	16.39	124	11
2021-07-26-12-58-22	2021	7	26	12	58	22.61	35.1485	25.2293	6.75	2.1	1	18.19	0.14	0.58	0.38	2.12	129	12
2021-07-26-18-16-20	2021	7	26	18	16	20.24	35.1533	25.2462	5.76	3	1	16.85	0.19	0.42	0.26	1.5	120	30
2021-07-26-19-45-33	2021	7	26	19	46	24.02	35.1601	25.2484	7.53	2.1	1	16.57	0.14	0.58	0.28	2.53	120	17
2021-07-26-19-52-25	2021	7	26	19	52	24.78	35.1502	25.2465	5.61	2.6	1	18.76	0.14	0.45	0.25	1.25	127	22
2021-07-26-20-06-26	2021	7	26	20	6	35.64	35.1621	25.2491	7.94	2.1	1	16.85	0.22	0.61	0.33	0.99	122	18
2021-07-26-22-25-49	2021	7	26	22	25	49.82	35.1579	25.2425	11.8	2	1	18.44	0.08	0.65	0.42	2.29	128	13
2021-07-26-23-21-15	2021	7	26	23	21	15.8	35.1529	25.2364	6.11	1.2	1	17.43	0.22	0.81	0.46	3.86	122	12
2021-07-26-23-24-22	2021	7	26	23	24	54.28	35.1703	25.2448	11.86	1.2	1	15.78	0.11	0.66	0.47	2.83	118	11
2021-07-27-01-17-54	2021	7	27	1	18	47.47	35.1497	25.2314	6.39	1.6	1	18.2	0.13	0.58	0.37	1.75	129	14
2021-07-27-01-31-30	2021	7	27	1	31	31.06	35.1559	25.2362	6.72	1	1	17.26	0.14	0.63	0.37	1.08	125	11
2021-07-27-02-38-52	2021	7	27	2	39	6.62	35.1706	25.2372	13.35	1.6	1	16.65	0.09	0.75	0.45	2.48	121	11
2021-07-27-07-54-59	2021	7	27	7	54	59.27	35.1554	25.2445	6.37	3	1	17.38	0.22	0.41	0.29	1.52	122	35
2021-07-27-10-19-05	2021	7	27	10	19	6.8	35.1501	25.2417	5.58	1.8	1	17.06	0.12	0.63	0.41	3.66	121	11
2021-07-27-13-58-15	2021	7	27	13	58	59.84	35.1512	25.2391	6.62	1.3	1	19.16	0.06	0.47	0.34	1.25	133	11
2021-07-27-15-42-51	2021	7	27	15	43	15.9	35.1606	25.2404	9.52	1.8	1	16.95	0.12	0.61	0.4	18.73	123	11
2021-07-27-19-39-59	2021	7	27	19	40	47	35.1544	25.245	5.97	1.2	1	16.68	0.07	0.72	0.41	2.63	121	11
2021-07-27-21-26-08	2021	7	27	21	26	8.46	35.1547	25.243	5.73	1.6	1	17.66	0.16	0.52	0.28	1.53	124	25
2021-07-27-21-35-38	2021	7	27	21	36	12.76	35.1701	25.2508	14.01	1.4	1	16.58	0.13	0.84	0.54	3.61	139	11
2021-07-27-22-38-39	2021	7	27	22	38	39.7	35.1536	25.2449	6.28	1.3	1	16.34	0.22	0.61	0.37	1.68	120	19
2021-07-27-23-13-27	2021	7	27	23	13	33.52	35.1573	25.2418	6.09	1.5	1	16.74	0.08	0.83	0.58	3.47	148	11
2021-07-27-23-39-17	2021	7	27	23	39	52.92	35.1556	25.238	6.29	1.5	1	19	0.12	1.44	0.5	4.92	178	11
2021-07-28-01-31-45	2021	7	28	1	31	45.32	35.1514	25.2458	5.28	1.9	1	17.02	0.15	0.63	0.42	3.63	121	12
2021-07-28-02-26-14	2021	7	28	2	27	1.57	35.1424	25.2453	8.95	2	1	17.65	0.08	0.77	0.54	3.68	138	11
2021-07-28-03-13-05	2021	7	28	3	13	44.91	35.1772	25.2251	2.42	1.4	1	15.33	0.14	1.82	1.12	4.34	139	11
2021-07-28-07-53-23	2021	7	28	7	54	8.2	35.1503	25.2321	6.06	2.1	1	18.12	0.06	0.58	0.39	1.87	128	11
2021-07-28-16-45-12	2021	7	28	16	45	48.74	35.15	25.239	11.88	1.5	1	19.7	0.16	0.7	0.39	2.32	132	13
2021-07-28-18-37-39	2021	7	28	18	37	39.28	35.1494	25.2294	6.04	2.3	1	18.3	0.22	0.56	0.32	1.71	129	21
2021-07-28-21-07-11	2021	7	28	21	7	12.48	35.1571	25.2405	6.19	1.6	1	16.94	0.03	0.57	0.37	2.36	123	11
2021-07-29-02-19-23	2021	7	29	2	19	34.21	35.156	25.2442	7.12	1.2	1	17	0.09	0.63	0.4	13.14	121	11
2021-07-29-03-33-07	2021	7	29	3	33	7.61	35.1537	25.2356	4.74	2.6	1	17.25	0.17	0.48	0.25	1.55	125	28
2021-07-29-12-58-16	2021	7	29	12	59	2.32	35.16	25.2419	9.87	1.3	1	16.59	0.12	0.82	0.5	4.34	143	11
2021-07-29-17-27-44	2021	7	29	17	27	44.48	35.1502	25.2478	6.18	2.2	1	17.42	0.19	0.68	0.43	2.09	119	13
2021-07-29-17-35-20	2021	7	29	17	35	45.56	35.1452	25.2335	6.05	1.6	1	14.81	0.04	0.98	1.27	2.88	250	11
2021-07-30-05-50-03	2021	7	30	5	50	3.9	35.1448	25.2328	4.7	2.4	1	18.45	0.11	0.42	0.25	1.93	129	27
2021-07-30-20-37-58	2021	7	30	20	38	5.16	35.1518	25.2401	7.26	1.4	1	16.95	0.1	1.03	0.77	4.04	147	11
2021-07-30-23-08-49	2021	7	30	23	10	11.16	35.1488	25.2311	7.45	1.6	1	17.73	0.14	0.46	0.27	1.67	127	17
2021-07-31-00-02-20	2021	7	31	0	2	19.72	35.1474	25.231	6.56	1.3	1	18.12	0.14	0.63	0.41	15.97	128	11
2021-07-31-02-18-27	2021	7	31	2	19	20.48	35.1614	25.24	8.67	2.3	1	16.08	0.24	0.53	0.28	0.88	120	32
2021-07-31-02-52-58	2021	7	31	2	52	57.51	35.1532	25.2357	6.03	2.1	1	16.32	0.1	0.5	0.43	1.13	119	13
2021-07-31-03-01-15	2021	7	31	3	1	51.06	35.1537	25.2436	8.15	1.1	1	13.94	0.15	0.68	0.55	20.21	148	11
2021-07-31-03-05-11	2021	7	31	3	5	18.82	35.1659	25.2436	12.68	1.1	1	16.48	0.05	0.93	0.56	5.14	144	11
2021-07-31-04-48-55	2021	7	31	4	48	55.38	35.1606	25.2412	7.57	2	1	17.41	0.09	0.6	0.39	2.92	125	12
2021-07-31-12-31-36	2021	7	31	12	31	36.74	35.1566	25.2445	8.56	2	1	17.37	0.13	0.8	0.44	4.04	128	11
2021-07-31-21-44-47	2021	7	31	21	44	48.22	35.1473	25.2417	6.93	1.3	1	19.94	0.22	0.64	0.33	1.55	134	18
2021-08-01-00-16-02	2021	8	1	0	16	3.19	35.1524	25.2371	4.42	2.1	1	20.15	0.35	0.77	0.46	2.07	134	20
2021-08-01-00-50-36	2021	8	1	0	50	37.05	35.1635	25.2414	11.61	0.9	1	16.88	0.13	0.59	0.37	5.43	128	13
2021-08-01-03-33-22	2021	8	1	3	33	22.34	35.1618	25.24	10.17	2.6	1	17.07	0.18	0.49	0.21	1.28	130	34
2021-08-01-06-56-03	2021	8	1	6	56	2.8	35.1519	25.2419	5.76	3.1	1	17.37	0.12	0.4	0.25	0.79	129	22
2021-08-01-07-58-39	2021	8	1	7	58	38.93	35.1551	25.2372	7.57	2.3	1	17.18	0.2	0.78	0.4	2.09	129	13
2021-08-01-08-04-55	2021	8	1	8	4	55.18	35.1589	25.2395	7.73	2.1	1	17.33	0.1	0.6	0.37	18.74	129	11
2021-08-01-18-08-15	2021	8	1	18	8	14.76	35.1506	25.2331	7.29	2.1	1	17.97	0.12	0.39	0.2	1.31	128	29
2021-08-01-20-21-08	2021	8	1	20	21	8.24	35.1474	25.2313	6.08	2.5	1	18.59	0.12	0.46	0.27	1.08	129	21
2021-08-01-22-40-14	2021	8	1	22	40	54.6	35.1573	25.2415	6.54	1.9	1	15.99	0.17	0.48	0.26	1.24	120	25
2021-08-02-00-02-17	2021	8	2	0	2	17.45	35.1591	25.2384	7.66	2.5	1	17.36	0.15	0.45	0.22	0.94	125	35
2021-08-02-01-01-27	2021	8	2	1	1	27.79	35.1563	25.2373	11.08	0.9	1	19.12	0.24	0.74	0.48	4.39	130	13
2021-08-02-07-53-25	2021	8	2	7	53	24.74	35.1486	25.2296	6.67	3	1	18	0.21	0.45	0.24	1.75	128	34
2021-08-02-08-05-36	2021	8	2	8	5	35.92	35.1482	25.2295	6.34	2.5	1	17.81	0.23	0.56	0.37	1.72	126	20
2021-08-02-08-08-46	2021	8	2	8	9	20.36	35.1447	25.2299	5.49	1.9	1	17.3	0.15	0.72	0.5	3.48	137	11
2021-08-02-08-27-35	2021	8	2	8	27	34.92	35.1504	25.2328	6.72	2.3	1	18.71	0.1	0.58	0.38	6.64	130	11
2021-08-02-09-50-53	2021	8	2	9	51	41.08	35.1448	25.2383	7.35	1.8	1	14.98	0.05	1	1.3	3.09	252	11
2021-08-02-15-17-53	2021	8	2	15	17	53.61	35.1525	25.2451	5.92	1.6	1	17.07	0.17	0.5	0.35	1.51	123	17
2021-08-02-17-05-00	2021	8	2	17	5	19.08	35.1568	25.2388	6.8	1.6	1	16.57	0.17	0.57	0.29	3.14	121	16
2021-08-02-17-24-07	2021	8	2	17	24	11.24	35.1604	25.2386	8.09	2.7	1	16.93	0.15	0.5	0.25	1.1	121	26
2021-08-02-17-56-35	2021	8	2	17	56	34.72	35.1523	25.246	5.61	2.6	1	16.31	0.15	0.39	0.23	0.8	120	39
2021-08-02-20-53-15	2021	8	2	20	54	2.84	35.1468	25.2306	6.46	1.5	1	16.81	0.11	0.79	0.52	3.52	137	11
2021-08-02-23-40-54	2021	8	2	23	40	54.32	35.1651	25.2469	9.69	1.5	1	16.57	0.09	0.61	0.39	3.25	120	11
2021-08-03-00-51-31	2021	8	3	0	51	31.15	35.1579	25.2416	7.79	3	1	18.05	0.13	0.34	0.21	0.64	127	29
2021-08-03-01-05-45	2021	8	3	1	6	6.09	35.1588	25.2386	8.33	2	1	17.53	0.1	0.62	0.4	2.58	125	11
2021-08-03-01-09-47	2021	8	3	1	10	12.81	35.1616	25.2427	11.58	1.4	1	16.31	0.1	0.73	0.52	2.93	143	11
2021-08-03-01-13-30	2021	8	3	1	14	1.67	35.1578	25.2413	7.42	1.7	1	16.15	0.03	0.84	0.71	3.65	144	11
2021-08-03-01-53-03	2021	8	3	1	53	47.39	35.1466	25.2322	6.29	1.4	1	18.21	0.12	0.6	0.4	4.32	129	11
2021-08-03-01-56-05	2021	8	3	1	56	44.04	35.1595	25.2402	6.35	1.6	1	16.83	0.11	0.79	0.61	2.52	144	14
2021-08-03-02-00-18	2021	8	3	2	1	0.199997	35.1577	25.2406	7.73	1.7	1	17.3	0.16	0.48	0.34	0.95	125	17
2021-08-03-07-58-18	2021	8	3	7	58	19.18	35.1614	25.2393	7.33	1.9	1	18.1	0.07	0.58	0.38	3.16	128	11
2021-08-04-01-02-02	2021	8	4	1	2	23.71	35.1581	25.2376	7.88	1.5	1	16.95	0.27	0.66	0.38	1.63	121	20
2021-08-04-02-39-03	2021	8	4	2	39	3.79	35.1468	25.2299	5.9	1.9	1	17.22	0.17	0.54	0.29	1.64	126	22
2021-08-04-09-48-59	2021	8	4	9	48	59.62	35.1493	25.2447	6.39	2.5	1	18.65	0.11	0.36	0.25	0.6	127	21
2021-08-04-11-53-26	2021	8	4	11	54	15.97	35.1621	25.2412	10.3	2	1	16.58	0.08	0.58	0.4	2.28	121	11
2021-08-04-15-08-35	2021	8	4	15	8	34.98	35.1539	25.2397	6.97	2.6	1	17.28	0.11	0.45	0.3	1.19	124	20
2021-08-04-20-25-57	2021	8	4	20	26	0.360001	35.1595	25.2485	6.75	1.7	1	15.58	0.16	0.7	0.46	3.33	118	11
2021-08-04-22-02-32	2021	8	4	22	3	8.28	35.1465	25.2307	6.41	1.4	1	18.97	0.26	0.87	0.55	7.47	131	12
2021-08-04-22-14-18	2021	8	4	22	14	18.28	35.1475	25.2314	5.76	2.1	1	18.51	0.16	0.62	0.37	2.37	131	23
2021-08-05-05-24-51	2021	8	5	5	24	50.09	35.1554	25.2471	6.63	2.4	1	17.83	0.13	0.52	0.28	1.36	125	17
2021-08-05-10-43-44	2021	8	5	10	44	15.61	35.1519	25.2332	9.94	1.9	1	17.37	0.06	1.33	1.62	4.28	262	11
2021-08-05-14-52-37	2021	8	5	14	53	10.25	35.1623	25.2404	9.65	1.4	1	16.42	0.03	2.19	1.72	5.43	150	11
2021-08-05-15-29-51	2021	8	5	15	30	29.04	35.1592	25.2402	8.88	1.8	1	15.75	0.08	0.73	0.49	2.69	153	11
2021-08-05-21-03-22	2021	8	5	21	3	50.68	35.1577	25.246	6.72	1.6	1	17.29	0.09	0.6	0.41	13.71	121	11
2021-08-05-22-13-05	2021	8	5	22	13	5.72	35.1583	25.2398	6.52	2.1	1	17.19	0.12	0.61	0.36	5.08	125	13
2021-08-05-22-13-46	2021	8	5	22	14	30.92	35.161	25.241	9.05	2.5	1	17.36	0.13	0.41	0.26	0.77	126	24
2021-08-05-22-44-33	2021	8	5	22	44	42.84	35.158	25.2415	7.08	2	1	16.68	0.13	0.56	0.3	1	123	13
2021-08-05-23-58-17	2021	8	5	23	58	17.32	35.1496	25.2315	7.51	2.4	1	18.03	0.08	0.42	0.24	2.27	128	25
2021-08-06-00-11-02	2021	8	6	0	11	2.66	35.1561	25.2402	6.3	1.8	1	17.56	0.1	0.34	0.28	0.72	125	17
2021-08-06-00-54-27	2021	8	6	0	54	43.7	35.1835	25.2606	18.2	0.8	1	14.21	0.09	2.26	1.16	4.29	157	11
2021-08-06-00-59-30	2021	8	6	0	59	31.31	35.1495	25.2166	3.79	0.8	1	16.38	0.14	0.59	0.45	3.23	125	12
2021-08-06-02-11-50	2021	8	6	2	11	51.14	35.1568	25.2442	11.76	0.9	1	16.69	0.16	0.59	0.4	2.76	121	12
2021-08-06-02-30-51	2021	8	6	2	30	51.48	35.1597	25.2417	8.98	1.9	1	16.32	0.08	0.58	0.38	3.36	121	11
2021-08-06-04-20-04	2021	8	6	4	20	5.31	35.147	25.2312	6.06	2.5	1	18.01	0.19	0.42	0.24	1.1	129	31
2021-08-06-05-19-43	2021	8	6	5	20	42.33	35.1444	25.2292	5.28	1.8	1	14.67	0.06	1.35	0.49	2.83	165	11
2021-08-06-06-38-49	2021	8	6	6	39	32.64	35.1447	25.2324	5.48	1.6	1	12.09	0.06	2.29	0.71	4.81	159	11
2021-08-06-09-34-22	2021	8	6	9	34	21.72	35.1465	25.2319	6.16	3.1	1	17.24	0.34	0.64	0.33	1.2	126	34
2021-08-06-10-37-10	2021	8	6	10	38	5.58	35.1532	25.2501	5.2	1.5	1	16.85	0.12	0.64	0.4	1.24	122	12
2021-08-06-17-58-01	2021	8	6	17	58	3.8	35.1549	25.235	5.16	3	1	23.96	0.53	0.69	0.43	1.75	162	46
2021-08-07-05-14-58	2021	8	7	5	14	58.16	35.157	25.2345	5.14	3.6	1	23.58	0.26	0.6	0.3	1.32	160	54
2021-08-07-05-20-10	2021	8	7	5	20	10.1	35.1277	25.2451	5.44	2.7	1	26.93	0.33	1.28	0.58	2.85	166	15
2021-08-07-05-22-40	2021	8	7	5	22	52.55	35.1492	25.2447	7.57	2.4	1	21.83	0.18	0.89	0.42	2.04	156	14
2021-08-07-09-03-56	2021	8	7	9	3	57.13	35.1589	25.2403	7.62	2.3	1	17.24	0.07	0.57	0.37	3.34	124	11
2021-08-07-09-52-54	2021	8	7	9	52	55.43	35.158	25.2413	7.02	2.2	1	16.24	0.11	0.58	0.41	2.47	121	11
2021-08-07-10-13-10	2021	8	7	10	13	10.51	35.1614	25.2394	5.6	1.3	1	17.95	0.09	0.68	0.37	4.18	127	11
2021-08-07-11-13-35	2021	8	7	11	13	35.9	35.1566	25.2403	6	1.9	1	18.26	0.13	0.69	0.45	19.49	131	12
2021-08-07-13-28-08	2021	8	7	13	29	5.74	35.1621	25.2339	11.5	2.2	1	17.74	0.06	0.57	0.37	3.12	125	11
2021-08-07-14-04-42	2021	8	7	14	4	41.94	35.1504	25.237	4.31	2.3	1	18.63	0.1	0.35	0.27	0.65	129	16
2021-08-07-14-30-03	2021	8	7	14	30	43.47	35.155	25.241	7.53	1.8	1	16.61	0.07	0.6	0.39	2.85	123	11
2021-08-07-14-53-15	2021	8	7	14	54	14.73	35.1561	25.2411	5.89	1.5	1	17.62	0.17	0.78	0.47	1.56	125	11
2021-08-07-15-02-12	2021	8	7	15	2	51.79	35.152	25.236	5.48	2	1	17.03	0.04	0.85	0.62	3.41	143	11
2021-08-07-18-42-52	2021	8	7	18	42	53.1	35.1642	25.2402	10.2	2.8	1	17.24	0.21	0.5	0.28	1.36	125	26
2021-08-07-18-48-49	2021	8	7	18	49	41.48	35.1513	25.2335	4.93	2.3	1	17.87	0.09	0.53	0.37	1.87	126	11
2021-08-07-19-31-51	2021	8	7	19	31	57.88	35.1578	25.2457	9.42	2.1	1	17.57	0.12	0.53	0.3	3.05	125	15
2021-08-07-21-46-19	2021	8	7	21	46	18.96	35.166	25.2451	11.99	2.9	1	18.69	0.25	0.35	0.22	0.63	128	46
2021-08-07-22-18-31	2021	8	7	22	18	30.88	35.1492	25.2444	6.14	2.4	1	17.57	0.14	0.42	0.23	0.92	124	32
2021-08-07-23-35-26	2021	8	7	23	35	26.08	35.1504	25.2405	4.99	1.7	1	17.77	0.1	0.38	0.34	1.01	125	15
2021-08-08-00-24-48	2021	8	8	0	25	25.99	35.1545	25.2465	5.86	1.6	1	17.89	0.11	0.63	0.41	3.3	125	11
2021-08-08-02-23-48	2021	8	8	2	24	9.07	35.1602	25.2346	8.39	1.3	1	13.7	0.13	0.86	0.43	16.16	163	11
2021-08-08-02-31-36	2021	8	8	2	31	45.04	35.1554	25.2691	5.82	1.8	1	18.34	0.12	0.62	0.4	19.42	120	11
2021-08-08-03-16-50	2021	8	8	3	16	51.14	35.1615	25.2395	6.34	3.1	1	17.75	0.15	0.42	0.22	0.88	126	34
2021-08-08-04-32-51	2021	8	8	4	33	4.08	35.173	25.246	12.71	2	1	16.46	0.09	1.36	1.03	3.83	155	11
2021-08-08-04-52-19	2021	8	8	4	52	20.06	35.1554	25.2406	6.55	2	1	16.78	0.05	0.56	0.37	2.05	122	11
2021-08-08-06-55-53	2021	8	8	6	55	52.61	35.1549	25.2683	7.16	2	1	18.25	0.12	0.66	0.43	2.21	120	12
2021-08-08-07-04-52	2021	8	8	7	4	51.75	35.1621	25.2421	9.76	1.7	1	16.84	0.07	0.57	0.38	4.03	122	11
2021-08-08-14-49-47	2021	8	8	14	49	47.69	35.1116	25.2016	4.84	1.3	1	22.93	0.2	0.91	0.43	7.52	153	14
2021-08-08-15-49-16	2021	8	8	15	49	17.33	35.1598	25.2374	6.68	2.1	1	16.24	0.19	0.57	0.27	2.36	121	23
2021-08-08-15-58-05	2021	8	8	15	58	15.44	35.1581	25.2386	7.52	2.5	1	17.21	0.17	0.47	0.24	1.4	124	30
2021-08-08-16-28-11	2021	8	8	16	28	11.76	35.1592	25.2402	9.85	2	1	16.42	0.14	0.5	0.25	1.01	119	24
2021-08-08-18-21-50	2021	8	8	18	21	49.32	35.1619	25.2406	9.98	2.2	1	16.06	0.17	0.46	0.26	0.72	116	33
2021-08-08-19-15-47	2021	8	8	19	15	46.68	35.1494	25.2376	5.78	3.7	1	17.52	0.15	0.37	0.2	0.67	125	56
2021-08-08-19-39-21	2021	8	8	19	39	24.44	35.1782	25.2251	14.04	1.5	1	14.74	0.06	0.77	0.49	2.67	144	11
2021-08-08-19-54-25	2021	8	8	19	54	30.58	35.1589	25.2414	6.72	1.5	1	17.79	0.22	0.76	0.42	4.19	127	13
2021-08-08-20-15-53	2021	8	8	20	15	52.56	35.1599	25.2412	7.53	2.4	1	17.99	0.11	0.44	0.24	0.82	127	21
2021-08-08-20-19-14	2021	8	8	20	19	15.2	35.1575	25.2403	7.07	2.2	1	18.13	0.13	0.61	0.33	1.67	128	15
2021-08-08-21-26-09	2021	8	8	21	26	9.96	35.1578	25.2402	6.99	2.9	1	18.2	0.2	0.46	0.27	1.3	128	26
2021-08-08-22-06-06	2021	8	8	22	6	50.32	35.1568	25.24	7.12	1.4	1	17.07	0.11	0.62	0.4	3.49	123	11
2021-08-09-00-16-14	2021	8	9	0	16	15.05	35.1583	25.2402	6.86	1.7	1	17.86	0.12	0.59	0.39	3.75	125	12
2021-08-09-00-40-36	2021	8	9	0	40	36.77	35.1591	25.2399	6.62	1.8	1	17.6	0.12	0.87	0.44	3.93	125	11
2021-08-09-01-34-30	2021	8	9	1	35	21.16	35.1598	25.2462	6.72	1.5	1	15.86	0.09	0.66	0.42	2.36	123	11
2021-08-09-01-46-09	2021	8	9	1	46	9.93	35.1576	25.2427	10.52	1.2	1	17.22	0.09	0.58	0.41	3.07	124	11
2021-08-09-02-31-11	2021	8	9	2	31	41.24	35.1684	25.2428	13.36	1.3	1	17.39	0.12	0.57	0.4	4.41	123	11
2021-08-09-02-36-43	2021	8	9	2	37	41.56	35.1467	25.2401	6.19	1.7	1	16.63	0.11	0.97	0.73	4.37	141	11
2021-08-09-02-39-28	2021	8	9	2	40	33.58	35.1622	25.2428	9.9	1.2	1	15.75	0.09	1.15	1.46	3.21	262	11
2021-08-09-02-46-51	2021	8	9	2	47	10.21	35.1565	25.2432	10.71	1.4	1	17.05	0.1	0.54	0.37	15.36	123	11
2021-08-09-03-05-30	2021	8	9	3	6	8.39	35.1504	25.2504	6.49	3.6	1	19.54	0.18	0.37	0.23	0.61	129	40
2021-08-09-04-17-47	2021	8	9	4	17	47.25	35.1436	25.2489	5.79	3.7	1	18.43	0.16	0.3	0.18	0.57	126	56
2021-08-09-07-37-48	2021	8	9	7	37	50.94	35.1603	25.2408	10.81	2	1	16.78	0.06	0.57	0.37	2.67	122	11
2021-08-09-08-03-09	2021	8	9	8	4	9.34	35.1593	25.24	13.16	2	1	17.39	0.03	0.63	0.39	2.77	129	11
2021-08-09-08-25-23	2021	8	9	8	25	24.3	35.1577	25.2387	9.11	2	1	17.94	0.14	0.51	0.33	2.09	126	15
2021-08-09-08-29-20	2021	8	9	8	30	0.0400009	35.1571	25.2406	6.72	1.8	1	17.03	0.1	0.59	0.36	2.64	123	12
2021-08-09-08-33-53	2021	8	9	8	33	56.81	35.1583	25.2419	6.49	2.1	1	17.65	0.14	0.58	0.41	10.98	126	11
2021-08-09-11-36-12	2021	8	9	11	37	5.11	35.1556	25.2301	9.32	1.8	1	17.45	0.1	0.82	0.46	2.62	174	11
2021-08-10-09-33-17	2021	8	10	9	33	57.61	35.159	25.2443	11	1.6	1	13.6	0.1	1.3	0.47	2.64	163	11
2021-08-11-01-50-47	2021	8	11	1	50	47.29	35.1538	25.2347	5.04	2	1	17.79	0.11	0.46	0.3	1.47	127	25
2021-08-11-15-07-09	2021	8	11	15	8	9.93	35.1445	25.2405	9.45	2.3	1	17.92	0.37	0.5	0.35	0.84	125	29
2021-08-11-15-52-37	2021	8	11	15	53	5.18	35.159	25.2432	6.4	1.4	1	17.81	0.12	0.57	0.4	3.55	127	11
2021-08-11-17-29-14	2021	8	11	17	30	16.16	35.1478	25.2425	6.12	1.6	1	18	0.21	0.74	0.41	2.09	127	13
2021-08-11-19-40-46	2021	8	11	19	40	46.2	35.1583	25.239	7.55	2.3	1	17.35	0.18	0.45	0.37	0.99	124	13
2021-08-11-19-41-41	2021	8	11	19	41	41.08	35.1616	25.2402	10.11	3.1	1	17.05	0.22	0.41	0.21	0.91	123	43
2021-08-11-19-49-30	2021	8	11	19	49	29.74	35.1547	25.2345	9.44	3.4	1	18.74	0.31	0.36	0.24	0.6	129	45
2021-08-11-19-52-57	2021	8	11	19	52	56.6	35.1568	25.2399	6.75	2.5	1	17.43	0.11	0.46	0.26	0.87	125	16
2021-08-11-19-55-34	2021	8	11	19	55	34.3	35.1593	25.2392	6.55	2	1	17.11	0.18	0.45	0.3	1.59	123	19
2021-08-11-19-59-06	2021	8	11	19	59	6.46	35.1637	25.2466	10.87	2.1	1	17.84	0.17	0.71	0.39	2.08	127	14
2021-08-11-20-03-47	2021	8	11	20	3	46.36	35.1596	25.2413	8.24	2	1	18.27	0.08	0.56	0.3	1.09	128	13
2021-08-11-20-16-29	2021	8	11	20	17	14.54	35.1609	25.2386	8.92	1.7	1	15.19	0.1	1.27	0.44	3.44	167	11
2021-08-11-20-26-16	2021	8	11	20	26	16.04	35.1531	25.2365	6.07	2.8	1	17.7	0.24	0.39	0.24	0.71	126	34
2021-08-11-20-58-50	2021	8	11	20	58	49.38	35.1586	25.239	6.16	2.4	1	18.01	0.22	0.37	0.25	0.62	126	34
2021-08-11-21-04-06	2021	8	11	21	4	14.88	35.1586	25.2383	6.64	1.7	1	17.45	0.1	0.43	0.3	0.89	124	13
2021-08-11-21-41-56	2021	8	11	21	41	55.2	35.1619	25.2333	3.19	1.9	1	17	0.17	0.65	0.37	1.14	123	14
2021-08-11-21-46-51	2021	8	11	21	47	26	35.1558	25.2375	6.1	1.5	1	16.49	0.1	0.59	0.41	3.27	120	11
2021-08-11-23-50-08	2021	8	11	23	50	7.68	35.1601	25.2406	7.24	3.1	1	18.17	0.23	0.37	0.23	0.56	127	39
2021-08-12-00-46-25	2021	8	12	0	47	7.38	35.1653	25.2425	6.76	1.5	1	16.89	0.09	0.38	0.28	0.86	122	13
2021-08-12-07-34-10	2021	8	12	7	34	10.85	35.1627	25.241	10.01	3	1	17.01	0.11	0.43	0.26	1.25	123	26
2021-08-12-12-17-54	2021	8	12	12	17	54.65	35.164	25.2409	10.88	1.6	1	16.84	0.12	0.55	0.41	2.46	122	16
2021-08-12-15-12-42	2021	8	12	15	12	42.8	35.17	25.2486	14.37	1.8	1	13.74	0.07	1.36	0.47	2.71	163	15
2021-08-12-16-01-15	2021	8	12	16	2	10.22	35.1604	25.2414	8.99	1.9	1	16.19	0.06	0.59	0.41	2.14	120	11
2021-08-12-17-18-09	2021	8	12	17	18	9.3	35.1602	25.2432	9.71	3.1	1	16.78	0.16	0.4	0.26	0.77	122	37
2021-08-12-17-33-28	2021	8	12	17	33	53.6	35.1575	25.2413	8.76	1.7	1	15.93	0.14	1.78	0.55	3.73	169	11
2021-08-12-19-48-24	2021	8	12	19	49	0.879997	35.1522	25.2401	7.44	2.2	1	14.42	0.1	1.18	0.49	2.86	165	11
2021-08-12-21-28-01	2021	8	12	21	28	2.42	35.154	25.2435	9.2	1.6	1	14.58	0.15	1.04	0.51	2.71	116	11
2021-08-12-22-54-51	2021	8	12	22	54	51.68	35.1614	25.2407	8.86	1.9	1	17.49	0.04	0.54	0.37	2.87	124	11
2021-08-13-02-47-45	2021	8	13	2	48	13.51	35.1651	25.2448	7.33	1.4	1	16.99	0.08	0.56	0.38	10.25	123	11
2021-08-13-04-12-29	2021	8	13	4	13	12.87	35.1847	25.231	15.12	1.6	1	15.56	0.12	0.88	0.53	3.45	138	11
2021-08-13-17-02-54	2021	8	13	17	3	43.86	35.1612	25.2418	8.79	2.4	1	17.16	0.13	0.47	0.3	1.66	123	20
2021-08-13-19-53-25	2021	8	13	19	53	25.26	35.1673	25.2438	12.43	2.5	1	16.47	0.11	0.5	0.3	1.91	119	18
2021-08-13-19-54-57	2021	8	13	19	54	56.6	35.1587	25.2398	7.7	2.8	1	17.3	0.1	0.37	0.24	0.68	123	31
2021-08-13-20-09-41	2021	8	13	20	10	13.4	35.1578	25.2397	6.52	1.8	1	13.93	0.1	1.05	0.44	3.32	164	11
2021-08-13-21-25-11	2021	8	13	21	25	9.96	35.1469	25.232	3.7	2.3	1	18.74	0.12	0.47	0.6	2.3	130	14
2021-08-13-23-22-48	2021	8	13	23	22	47.48	35.1644	25.2463	12.47	2.5	1	16.53	0.13	0.46	0.28	1.55	121	24
2021-08-14-04-33-08	2021	8	14	4	33	9.14	35.1711	25.2069	8.05	1.2	1	12.29	0.06	1.83	0.72	2.77	146	12
2021-08-14-11-06-21	2021	8	14	11	6	59.27	35.1603	25.2445	9.16	1.8	1	15.71	0.06	0.75	0.45	3.49	146	11
2021-08-14-20-40-17	2021	8	14	20	40	16.78	35.1546	25.2417	5.56	3.1	1	17.35	0.16	0.39	0.25	0.77	125	38
2021-08-14-20-56-05	2021	8	14	20	56	5.88	35.1537	25.2364	6.45	2.8	1	18.45	0.18	0.48	0.26	1.27	129	28
2021-08-14-21-03-36	2021	8	14	21	3	36.2	35.1583	25.2391	7.77	2.8	1	18.01	0.11	0.45	0.23	1.22	127	32
2021-08-14-21-20-02	2021	8	14	21	20	4.88	35.1572	25.2399	12.53	1.4	1	16.82	0.08	0.79	0.56	2.87	147	11
2021-08-14-22-59-58	2021	8	14	23	0	50.24	35.1563	25.2362	5.6	1.7	1	24.73	0.11	0.71	0.36	3.59	125	17
2021-08-15-00-32-09	2021	8	15	0	32	8.85	35.157	25.2421	6.73	1.8	1	25.24	0.09	0.92	0.42	15.86	141	11
2021-08-15-01-34-35	2021	8	15	1	34	34.19	35.1507	25.2329	3.76	2.8	1	22.95	0.18	0.44	0.28	0.74	129	29
2021-08-15-01-53-42	2021	8	15	1	53	42.38	35.1526	25.241	7.99	2.5	1	23.13	0.09	0.47	0.25	1.29	127	28
2021-08-15-03-06-35	2021	8	15	3	7	23.43	35.1655	25.2434	10.52	1.5	1	25.77	0.08	0.76	0.35	3.84	141	12
2021-08-15-06-38-56	2021	8	15	6	39	33.12	35.1618	25.2443	6.47	2.6	1	22.64	0.15	0.6	0.29	1.63	123	22
2021-08-15-10-25-24	2021	8	15	10	25	25.32	35.1531	25.2409	5.95	2.1	1	22.99	0.15	0.77	0.36	1.85	131	14
2021-08-15-14-08-29	2021	8	15	14	8	29.53	35.1574	25.2461	7.98	2.6	1	23.26	0.13	0.48	0.25	1.29	131	25
2021-08-15-14-28-17	2021	8	15	14	28	17.46	35.164	25.2474	4.13	2.5	1	22.31	0.18	0.66	0.34	1.8	128	19
2021-08-16-01-44-09	2021	8	16	1	44	9.79	35.1648	25.2314	16.68	1.3	1	24.33	0.15	0.82	0.37	2.87	134	14
2021-08-16-04-38-27	2021	8	16	4	38	27.86	35.1545	25.2375	6.45	2.4	1	21.91	0.21	0.59	0.27	2.46	128	21
2021-08-16-05-47-31	2021	8	16	5	47	50.64	35.1626	25.2374	6.58	1.9	1	21.17	0.08	0.63	0.36	1.14	124	12
2021-08-16-13-20-10	2021	8	16	13	20	55.08	35.1569	25.2403	7.15	1.8	1	16.65	0.08	0.6	0.39	2.46	122	11
2021-08-16-13-26-26	2021	8	16	13	27	13	35.1605	25.2399	9.13	2.6	1	16.52	0.23	0.52	0.29	1.36	121	29
2021-08-16-13-54-41	2021	8	16	13	54	41.65	35.1535	25.2338	6.34	3.6	1	17.91	0.29	0.43	0.22	1.02	127	48
2021-08-16-13-57-02	2021	8	16	13	57	2.57	35.1626	25.2401	10.96	2.8	1	17.15	0.21	0.43	0.26	0.74	125	31
2021-08-16-14-00-33	2021	8	16	14	0	34.18	35.1734	25.2528	13.94	1.7	1	14.8	0.18	0.58	0.33	1.45	113	19
2021-08-16-14-04-28	2021	8	16	14	5	5.26	35.1574	25.2403	7.96	2.3	1	14.77	0.23	0.57	0.37	0.95	115	22
2021-08-16-14-06-49	2021	8	16	14	6	49.68	35.156	25.2394	6.34	2.1	1	17.33	0.25	0.57	0.33	1.59	125	19
2021-08-16-14-13-02	2021	8	16	14	13	3.21	35.1593	25.2399	6.88	2.3	1	16.82	0.18	0.5	0.33	0.98	121	20
2021-08-16-14-14-13	2021	8	16	14	14	13.91	35.1595	25.2399	7.65	2.1	1	16.6	0.19	0.51	0.29	1.61	122	20
2021-08-16-14-15-40	2021	8	16	14	15	40.79	35.1614	25.2436	6.3	2.3	1	18.03	0.19	0.57	0.33	1.22	128	20
2021-08-16-14-22-23	2021	8	16	14	22	24.46	35.1571	25.2285	6.18	1.6	1	17.37	0.17	0.53	0.29	2.07	126	17
2021-08-16-14-34-35	2021	8	16	14	34	35.83	35.1588	25.2387	8.12	1.9	1	17.34	0.16	0.45	0.27	1.08	125	18
2021-08-16-15-12-11	2021	8	16	15	12	12.5	35.1601	25.2407	8.35	1.4	1	17.17	0.09	0.45	0.31	2.25	124	13
2021-08-16-16-49-44	2021	8	16	16	49	50.8	35.1849	25.2556	15.34	1.9	1	13.74	0.11	1.61	0.78	3.35	162	11
2021-08-16-17-20-36	2021	8	16	17	20	44	35.1563	25.2405	7.09	1.7	1	17.07	0.05	0.62	0.41	2.46	123	11
2021-08-16-17-32-48	2021	8	16	17	32	48.64	35.1536	25.2401	7.36	2.7	1	16.99	0.14	0.41	0.23	1.22	123	28
2021-08-16-18-08-52	2021	8	16	18	9	37.62	35.1648	25.2439	6.39	1.3	1	16.82	0.19	0.69	0.49	19.37	123	11
2021-08-16-18-59-24	2021	8	16	18	59	24.5	35.1559	25.2392	6.76	2.3	1	17.83	0.13	0.43	0.29	0.86	125	15
2021-08-16-21-16-07	2021	8	16	21	16	55.36	35.1627	25.2363	10.72	1.3	1	13.73	0.11	1.11	0.38	2.16	145	15
2021-08-16-23-33-04	2021	8	16	23	33	5.1	35.1629	25.2423	9.15	1.1	1	16.64	0.08	0.46	0.34	2.31	121	17
2021-08-17-00-32-30	2021	8	17	0	32	52.19	35.1578	25.2414	6.54	1.2	1	15.8	0.1	1.38	1.1	4.78	151	11
2021-08-17-01-28-35	2021	8	17	1	28	36.52	35.1609	25.2435	7.51	1.1	1	16.2	0.07	0.57	0.38	3.28	120	11
2021-08-17-11-20-56	2021	8	17	11	21	36.54	35.1569	25.2421	7.03	1.7	1	17.29	0.09	0.69	0.34	1.93	152	12
2021-08-17-12-02-38	2021	8	17	12	2	39.57	35.1622	25.2413	10.46	1.5	1	16.38	0.11	0.98	0.54	4.48	120	11
2021-08-17-12-42-22	2021	8	17	12	43	14.68	35.1575	25.2422	9.56	2.4	1	18.61	0.06	0.44	0.25	1.34	129	17
2021-08-17-13-32-15	2021	8	17	13	32	49.49	35.1599	25.2397	9.88	2.1	1	14.7	0.11	1.67	0.44	3.61	166	11
2021-08-17-21-16-19	2021	8	17	21	17	10.86	35.1578	25.242	6.45	1.8	1	14.91	0.1	1.39	0.45	3.01	167	11
2021-08-17-23-25-45	2021	8	17	23	25	45.12	35.1633	25.2391	10.68	2	1	16.66	0.13	0.69	0.41	2.44	122	12
2021-08-18-00-44-27	2021	8	18	0	44	44.96	35.1618	25.2388	9.28	1.6	1	16.28	0.07	0.58	0.38	2.73	120	11
2021-08-18-02-12-48	2021	8	18	2	12	47.81	35.1556	25.2409	7.4	3	1	18.47	0.19	0.41	0.25	0.76	129	31
2021-08-18-02-18-52	2021	8	18	2	18	51.89	35.1598	25.2405	8.33	2.1	1	15.4	0.07	0.79	0.48	2.84	153	11
2021-08-18-03-58-56	2021	8	18	3	59	44.2	35.1612	25.2421	7.77	1.8	1	16.61	0.09	0.64	0.4	5.88	126	11
2021-08-18-05-46-25	2021	8	18	5	46	25.31	35.161	25.2403	6.79	2.7	1	16.75	0.26	0.48	0.26	0.86	123	40
2021-08-18-06-00-02	2021	8	18	6	0	11.69	35.1593	25.2452	13.5	2.3	1	17.1	0.1	0.63	0.39	1.99	123	12
2021-08-18-11-19-22	2021	8	18	11	19	21.69	35.1614	25.2422	7.78	2.4	1	16.53	0.14	0.72	0.36	1.25	120	16
2021-08-18-18-39-04	2021	8	18	18	39	3.92	35.157	25.2536	6	2.4	1	17.5	0.15	0.37	0.22	1.05	121	36
2021-08-18-22-00-10	2021	8	18	22	0	26.76	35.161	25.2397	8.73	1.2	1	16.89	0.1	1.31	0.48	3.78	172	11
2021-08-18-22-23-31	2021	8	18	22	23	30.88	35.1577	25.2395	7.21	3.2	1	18	0.17	0.38	0.2	1.07	127	75
2021-08-18-23-02-20	2021	8	18	23	2	37.56	35.1569	25.2421	7.55	1.2	1	17.01	0.09	0.81	0.43	3.75	123	11
2021-08-18-23-25-06	2021	8	18	23	25	6.36	35.1543	25.2363	5.59	2.8	1	17.75	0.15	0.35	0.2	0.91	126	41
2021-08-19-02-40-06	2021	8	19	2	40	45.24	35.1632	25.2396	6.07	1.1	1	16.04	0.07	0.61	0.38	8.08	120	11
2021-08-19-05-18-59	2021	8	19	5	18	58.62	35.1544	25.2417	6.38	2.4	1	17.52	0.23	0.52	0.31	1.36	125	27
2021-08-19-07-34-42	2021	8	19	7	34	41.25	35.1538	25.2387	5.71	2.6	1	16.61	0.28	0.55	0.31	0.96	123	33
2021-08-19-12-11-00	2021	8	19	12	11	1.07	35.1536	25.2342	5.98	1.6	1	16.28	0.07	1.53	0.85	9.59	146	11
2021-08-19-19-01-14	2021	8	19	19	1	52.36	35.1668	25.2544	13.68	1.7	1	14.12	0.07	1.26	0.46	3.48	164	11
2021-08-19-19-16-51	2021	8	19	19	16	51.06	35.1521	25.2398	5.68	2.6	1	18	0.19	0.41	0.23	1.17	127	33
2021-08-19-19-28-21	2021	8	19	19	29	10.96	35.1604	25.241	7.65	1.6	1	16.9	0.07	0.89	0.43	3.07	175	11
2021-08-19-19-37-57	2021	8	19	19	37	58.2	35.1572	25.2399	7.74	1.4	1	15.73	0.07	0.59	0.4	2.66	123	11
2021-08-19-23-27-59	2021	8	19	23	27	58.36	35.1494	25.2455	5.02	1.5	1	18.68	0.13	0.66	0.38	3.02	128	14
2021-08-20-01-08-46	2021	8	20	1	8	47.39	35.1575	25.2407	6.7	2.6	1	17.94	0.11	0.48	0.26	1.25	127	18
2021-08-20-01-11-28	2021	8	20	1	11	27.81	35.156	25.248	6.11	2	1	17.21	0.12	0.58	0.35	3.73	123	15
2021-08-20-01-19-06	2021	8	20	1	19	6.44	35.1477	25.2364	5.5	2.8	1	18.84	0.21	0.47	0.27	1.33	130	29
2021-08-20-01-21-39	2021	8	20	1	22	49.82	35.1548	25.2406	7.41	1.7	1	16.41	0.15	0.63	0.38	1.09	122	13
2021-08-20-01-39-55	2021	8	20	1	40	48.3	35.1548	25.2416	10.31	1.8	1	16.24	0.06	1.06	1.36	3.27	260	11
2021-08-20-02-21-33	2021	8	20	2	22	17.11	35.1565	25.2397	7.03	2	1	15.18	0.06	1.09	0.42	2.83	167	11
2021-08-20-03-09-09	2021	8	20	3	9	48.44	35.1586	25.2388	6.84	1.8	1	16.62	0.07	1.2	0.41	3.73	172	11
2021-08-20-03-30-49	2021	8	20	3	30	48.97	35.159	25.2404	6.59	3.1	1	17.44	0.35	0.56	0.33	1.55	124	36
2021-08-20-05-00-26	2021	8	20	5	0	51.48	35.1659	25.2403	10.01	2.3	1	15.59	0.21	0.56	0.32	1.04	119	22
2021-08-20-05-01-03	2021	8	20	5	1	3.91	35.154	25.246	7.05	2.6	1	15.48	0.16	0.59	0.37	2.27	116	13
2021-08-20-05-09-08	2021	8	20	5	9	46.22	35.1563	25.2433	6.72	1.8	1	13.67	0.08	1.22	0.43	2.84	163	11
2021-08-20-05-14-09	2021	8	20	5	14	10.08	35.1536	25.2382	5.82	1.7	1	16.5	0.13	0.81	0.52	14.12	122	11
2021-08-20-15-53-48	2021	8	20	15	53	48.24	35.1561	25.2394	6.25	1.7	1	16.69	0.13	0.48	0.34	1.8	120	12
2021-08-20-16-02-36	2021	8	20	16	2	36.32	35.1567	25.2434	13.76	1.7	1	17.64	0.05	0.58	0.38	2.33	125	11
2021-08-20-19-47-47	2021	8	20	19	48	18.64	35.1649	25.2409	12.71	1.2	1	14.85	0.12	0.92	0.62	2.82	158	11
2021-08-20-21-52-24	2021	8	20	21	52	24.98	35.1585	25.235	11.58	1.2	1	17.7	0.15	0.57	0.4	2.78	126	12
2021-08-20-23-34-49	2021	8	20	23	34	50.12	35.1564	25.25	4.95	1.4	1	16.96	0.08	0.58	0.38	3.37	122	11
2021-08-21-00-14-52	2021	8	21	0	15	8.65	35.1573	25.2414	9.81	1.2	1	15.9	0.05	0.53	0.38	2.9	119	11
2021-08-21-04-05-24	2021	8	21	4	5	24.3	35.1483	25.2328	7.3	3.5	1	18.18	0.29	0.42	0.25	0.77	129	69
2021-08-21-04-42-46	2021	8	21	4	43	20.99	35.1448	25.2358	5.93	1.7	1	14.02	0.01	1.3	1.44	4.34	242	11
2021-08-21-05-02-58	2021	8	21	5	2	59.32	35.1397	25.217	5.93	1.2	1	20.74	0.21	0.69	0.49	23.72	138	11
2021-08-21-05-04-19	2021	8	21	5	4	19.87	35.1478	25.2279	5.74	1.5	1	18.93	0.17	0.51	0.41	3.67	131	14
2021-08-21-05-13-12	2021	8	21	5	13	12.56	35.1478	25.2311	6.22	1.7	1	18.08	0.13	0.63	0.41	9.25	129	11
2021-08-21-05-17-58	2021	8	21	5	19	2.79	35.1485	25.2307	6.11	2	1	17.48	0.23	0.71	0.37	1.62	127	16
2021-08-21-06-29-03	2021	8	21	6	29	28.48	35.1474	25.233	7.21	2.1	1	17.47	0.16	0.67	0.46	3.58	125	11
2021-08-21-11-23-25	2021	8	21	11	23	25.51	35.1456	25.2321	5.84	2	1	18.6	0.12	0.58	0.39	3.24	131	12
2021-08-21-13-13-09	2021	8	21	13	13	10.08	35.151	25.2359	5.97	1.7	1	17.79	0.21	0.52	0.29	1.38	128	17
2021-08-21-14-58-21	2021	8	21	14	58	21.62	35.1457	25.2305	5.87	2.4	1	19.06	0.2	0.44	0.24	1.28	133	29
2021-08-21-14-59-53	2021	8	21	14	59	54.51	35.161	25.24	9.1	2.1	1	16.87	0.16	0.47	0.28	1.15	120	24
2021-08-21-19-13-41	2021	8	21	19	13	41.94	35.1544	25.2342	6.9	1.2	1	17.02	0.13	0.48	0.33	1.01	125	16
2021-08-21-22-57-58	2021	8	21	22	57	59.48	35.1581	25.241	6.78	2	1	17.42	0.12	0.44	0.24	0.81	124	25
2021-08-22-03-21-40	2021	8	22	3	22	20.09	35.1649	25.2415	10.71	1.2	1	16.22	0.08	0.96	0.59	4.59	146	11
2021-08-22-21-33-51	2021	8	22	21	33	51.56	35.1599	25.2408	9.06	1.3	1	15.77	0.24	0.61	0.41	1.51	116	16
2021-08-23-01-48-53	2021	8	23	1	49	35.16	35.1414	25.2324	4.57	1.5	1	18.15	0.08	1.24	0.48	5.01	181	11
2021-08-23-11-48-39	2021	8	23	11	48	39.04	35.1473	25.2501	10.01	3.1	1	19.04	0.26	0.54	0.25	1.18	134	45
2021-08-23-18-39-14	2021	8	23	18	39	14.78	35.1617	25.2427	9.84	1.9	1	19.17	0.17	0.53	0.27	1.56	137	21
2021-08-24-00-26-07	2021	8	24	0	26	52.23	35.153	25.2418	5.06	1.5	1	17.25	0.08	0.85	0.39	1.97	129	11
2021-08-24-07-14-42	2021	8	24	7	14	43.37	35.141	25.2535	4.99	2.4	1	15.64	0.15	0.71	0.37	1.34	122	22
2021-08-24-20-35-26	2021	8	24	20	35	26.54	35.1474	25.2374	6.18	1.3	1	17.15	0.37	0.76	0.44	2.07	124	25
2021-08-24-20-36-49	2021	8	24	20	36	49.66	35.1729	25.2735	7.06	1.2	1	16.34	0.14	0.68	0.34	1.74	111	15
2021-08-24-23-17-35	2021	8	24	23	17	37.16	35.1633	25.2396	9.42	1.2	1	16.52	0.07	0.58	0.38	2.91	120	11
2021-08-25-00-00-56	2021	8	25	0	1	41.92	35.1521	25.2267	6.6	1.4	1	16.7	0.18	0.48	0.29	0.83	125	23
2021-08-25-00-03-33	2021	8	25	0	3	33.36	35.1471	25.2295	5.92	1.4	1	17.74	0.18	0.48	0.3	2.17	126	25
2021-08-25-00-23-56	2021	8	25	0	24	33.77	35.1579	25.2417	6.73	1.1	1	17.63	0.23	0.63	0.4	3.31	125	18
2021-08-25-03-27-18	2021	8	25	3	27	18.29	35.1583	25.2384	5	0.9	1	16.27	0.13	0.4	0.25	0.76	121	21
2021-08-25-03-58-39	2021	8	25	3	59	42.67	35.1569	25.2375	5.85	1.1	1	16.86	0.06	0.55	0.36	17.47	122	11
2021-08-25-08-27-48	2021	8	25	8	28	30.28	35.1597	25.2372	8.73	2	1	15.57	0.08	1.79	0.59	4.01	168	11
2021-08-25-08-53-42	2021	8	25	8	54	3.67	35.1592	25.2401	8	1.6	1	16.34	0.09	0.66	0.41	3.26	125	11
2021-08-25-15-30-56	2021	8	25	15	30	56.28	35.1593	25.2389	6.54	2.4	1	17.41	0.17	0.39	0.29	0.88	124	22
2021-08-25-17-53-47	2021	8	25	17	54	17.4	35.2061	25.2115	19.14	1.1	1	11.91	0.07	1.26	1.42	2.38	259	11
2021-08-25-21-19-11	2021	8	25	21	19	56	35.1439	25.248	5.52	1.4	1	18.72	0.13	0.35	0.25	0.74	128	22
2021-08-26-09-01-14	2021	8	26	9	1	14.65	35.1427	25.2344	5.1	1.9	1	17.37	0.36	0.99	0.56	1.97	124	14
2021-08-26-22-05-11	2021	8	26	22	5	39.12	35.1613	25.2386	9.6	1.5	1	15.56	0.06	0.73	0.48	2.67	151	11
2021-08-26-22-40-45	2021	8	26	22	40	45.72	35.1612	25.244	12.16	1.1	1	16.14	0.22	0.46	0.36	0.97	123	17
2021-08-26-22-44-33	2021	8	26	22	44	40.28	35.1622	25.2452	10.7	1.7	1	16.51	0.14	0.47	0.25	0.71	121	28
2021-08-27-00-14-12	2021	8	27	0	14	47.54	35.166	25.2436	12.41	0.8	1	16.54	0.14	0.71	0.5	16.07	145	11
2021-08-27-01-45-14	2021	8	27	1	45	13.87	35.1589	25.2399	7.26	2.7	1	16.27	0.23	0.47	0.23	0.89	121	44
2021-08-27-02-03-30	2021	8	27	2	4	2.45	35.1471	25.2381	1.29	1.4	1	16.35	0.09	0.6	0.41	2.36	121	11
2021-08-27-03-26-06	2021	8	27	3	27	2.04	35.1579	25.2407	6.8	2.3	1	17.13	0.17	0.39	0.23	0.71	124	37
2021-08-27-10-02-26	2021	8	27	10	3	4.26	35.159	25.2403	10.05	2	1	17.59	0.07	0.62	0.39	2.34	124	11
2021-08-27-12-17-45	2021	8	27	12	18	14.49	35.163	25.2465	13.29	3	1	18.54	0.18	0.34	0.2	0.58	129	50
2021-08-28-00-18-01	2021	8	28	0	18	1.79	35.1624	25.247	11.22	2.2	1	16.81	0.08	0.55	0.27	1.57	122	15
2021-08-28-02-58-46	2021	8	28	2	59	10.08	35.1533	25.2349	7.56	1.2	1	18.96	0.15	0.83	0.47	18.09	130	11
2021-08-28-08-20-31	2021	8	28	8	20	50.32	35.1444	25.2593	6.85	2.3	1	18.55	0.09	0.74	0.48	3.92	125	11
2021-08-28-08-28-23	2021	8	28	8	28	23.63	35.1563	25.2394	6.8	2	1	17.44	0.06	0.54	0.32	1.61	124	12
2021-08-28-19-19-51	2021	8	28	19	19	50.88	35.159	25.2395	8.65	1.7	1	15.32	0.08	0.84	0.51	3.04	152	11
2021-08-28-19-21-54	2021	8	28	19	21	54.16	35.1573	25.2385	6.59	3.3	1	15.87	0.19	0.48	0.24	0.7	118	51
2021-08-28-20-35-16	2021	8	28	20	35	53.84	35.1849	25.2254	1.75	1.1	1	14.08	0.08	0.66	0.41	2.08	114	11
2021-08-28-23-15-04	2021	8	28	23	15	31.12	35.1542	25.2399	6.07	1.3	1	16.35	0.06	0.74	0.37	2.15	120	11
2021-08-29-09-28-16	2021	8	29	9	28	16.53	35.1512	25.2609	6.63	2.3	1	18.66	0.15	0.64	0.36	1.65	125	23
2021-08-29-14-11-20	2021	8	29	14	11	20.33	35.1457	25.2434	7.93	3.2	1	18.81	0.28	0.34	0.22	0.63	130	53
2021-08-29-14-51-49	2021	8	29	14	51	50.13	35.1435	25.2431	6.28	2.3	1	19.49	0.26	0.57	0.3	1.46	132	22
2021-08-30-02-56-44	2021	8	30	2	57	31.78	35.1837	25.2174	15.33	1.4	1	15.21	0.09	1.35	2.51	5.58	262	11
2021-08-30-19-24-42	2021	8	30	19	25	10.08	35.1653	25.2394	10.92	1.1	1	16.03	0.12	0.63	0.41	3.57	119	11
2021-08-31-00-37-10	2021	8	31	0	37	10.19	35.1688	25.2444	8.86	2	1	16.2	0.31	0.6	0.32	0.99	120	30
2021-08-31-00-41-34	2021	8	31	0	41	38.32	35.1669	25.2432	10.11	0.9	1	15.1	0.21	1.46	0.65	2.16	155	11
2021-08-31-01-13-55	2021	8	31	1	14	33.42	35.1721	25.246	11.31	1.2	1	14.2	0.05	1.25	0.4	2.92	165	11
2021-08-31-01-25-12	2021	8	31	1	25	12.24	35.1564	25.24	5.42	1.6	1	17.75	0.37	0.93	0.47	5.02	123	18
2021-08-31-03-23-02	2021	8	31	3	23	49.51	35.1411	25.2345	5.7	1.4	1	15.45	0.05	1.19	1.35	3.19	254	11
2021-08-31-13-47-36	2021	8	31	13	47	36.77	35.1618	25.2454	11.49	2.5	1	17.17	0.12	0.55	0.3	1.47	122	16
2021-08-31-16-11-20	2021	8	31	16	11	37.46	35.1649	25.2446	7.44	1.4	1	17.13	0.07	0.84	0.43	17.09	175	11
2021-08-31-16-53-53	2021	8	31	16	54	16.3	35.1648	25.2415	10.77	1.1	1	16.73	0.09	0.62	0.41	6.54	121	11
2021-08-31-19-12-19	2021	8	31	19	12	45.2	35.1617	25.2484	14.3	1.2	1	16.62	0.11	1.64	1.39	4.54	154	11
2021-08-31-20-39-32	2021	8	31	20	39	32.12	35.1495	25.2546	7.66	3.1	1	19.58	0.2	0.35	0.2	0.97	129	61
2021-09-01-01-23-14	2021	9	1	1	23	14.49	35.1585	25.2389	7.53	2.3	1	16.44	0.2	0.47	0.24	0.68	119	42
2021-09-01-02-13-24	2021	9	1	2	14	14.63	35.1568	25.249	11.74	2.8	1	18.39	0.17	0.42	0.21	0.65	126	44
2021-09-01-05-50-59	2021	9	1	5	51	35.26	35.1615	25.2401	9.64	2.4	1	17.94	0.37	0.7	0.36	2.25	126	25
2021-09-01-08-33-44	2021	9	1	8	33	43.83	35.1583	25.2428	5.8	2.2	1	16.8	0.13	0.57	0.35	5.12	122	12
2021-09-01-08-53-54	2021	9	1	8	54	29.03	35.1576	25.2411	6.43	1.9	1	16.56	0.07	0.62	0.42	14.81	122	11
2021-09-01-09-57-48	2021	9	1	9	57	48.32	35.1664	25.2427	8.89	1	1	15.28	0.26	0.85	0.48	24.94	117	11
2021-09-01-14-59-56	2021	9	1	14	59	57.45	35.17	25.2479	7.51	1	1	16.7	0.13	0.45	0.36	1.48	127	14
2021-09-01-17-30-09	2021	9	1	17	30	9.7	35.1646	25.2469	6.51	2	1	17	0.31	0.51	0.33	2.91	123	24
2021-09-02-07-25-24	2021	9	2	7	25	23.27	35.1658	25.2408	9.83	2.4	1	16.3	0.07	0.62	0.32	1.06	120	13
2021-09-02-08-43-10	2021	9	2	8	43	23.07	35.1662	25.2432	7.63	2.1	1	14.07	0.07	0.6	0.4	2.49	114	11
2021-09-02-14-38-47	2021	9	2	14	39	10.42	35.1465	25.2305	5.97	1.6	1	18.3	0.15	0.57	0.34	1.75	130	13
2021-09-02-21-26-17	2021	9	2	21	26	26.12	35.1717	25.2543	12.56	1.3	1	14.49	0.08	1.64	1.24	3.25	168	11
2021-09-02-21-33-14	2021	9	2	21	33	14.92	35.1636	25.2434	6.98	2	1	16.4	0.2	0.46	0.25	2.1	119	26
2021-09-02-22-06-16	2021	9	2	22	6	15.9	35.1482	25.2312	7.02	2.9	1	18.3	0.16	0.34	0.2	0.83	129	59
2021-09-03-05-28-53	2021	9	3	5	28	53.26	35.1513	25.2324	7.3	2.6	1	19.17	0.17	0.39	0.28	0.9	132	20
2021-09-03-06-03-55	2021	9	3	6	3	55.8	35.1467	25.2269	6.47	2.4	1	18.38	0.23	0.68	0.47	4.04	127	13
2021-09-03-08-00-20	2021	9	3	8	0	33.05	35.148	25.2313	6.33	2.1	1	17.81	0.14	0.57	0.37	2.86	127	15
2021-09-03-15-19-19	2021	9	3	15	19	18.93	35.1481	25.2263	6.52	2.2	1	18.62	0.34	0.59	0.33	1.44	127	35
2021-09-03-21-26-06	2021	9	3	21	26	37.14	35.1549	25.2333	2.35	1.4	1	15.8	0.07	1.33	0.51	4.92	169	11
2021-09-03-21-55-46	2021	9	3	21	56	7.72	35.1472	25.2325	7.36	1.7	1	17.38	0.16	0.46	0.34	0.99	126	15
2021-09-03-22-03-59	2021	9	3	22	3	58.6	35.1499	25.2403	5.63	2.9	1	18.73	0.46	0.67	0.43	1.26	126	24
2021-09-04-00-01-35	2021	9	4	0	1	35.92	35.1466	25.2295	6.35	2	1	17.24	0.13	0.61	0.41	15.77	125	11
2021-09-04-00-39-08	2021	9	4	0	39	11.88	35.1495	25.2307	6.76	2	1	17.27	0.14	0.56	0.3	2.85	124	14
2021-09-04-01-06-01	2021	9	4	1	7	1.97	35.1506	25.2327	6.68	2.1	1	18.9	0.1	0.52	0.38	14.83	130	11
2021-09-04-06-12-07	2021	9	4	6	13	1.89	35.1525	25.2349	9.02	1.8	1	17.48	0.08	0.79	0.8	3.95	139	11
2021-09-04-08-12-17	2021	9	4	8	12	17.91	35.164	25.2419	7.29	3.1	1	17.09	0.09	0.32	0.19	0.57	123	26
2021-09-04-09-37-44	2021	9	4	9	37	44.21	35.1699	25.2455	9.3	2.9	1	15.01	0.12	0.42	0.25	1.1	116	24
2021-09-04-09-40-04	2021	9	4	9	40	51.9	35.164	25.2466	5.99	2.3	1	16.33	0.15	0.41	0.32	0.74	119	15
2021-09-04-11-54-50	2021	9	4	11	54	50.66	35.1691	25.2426	13.07	1.5	1	17.54	0.21	0.78	0.39	24.42	125	15
2021-09-04-18-02-05	2021	9	4	18	2	4.84	35.1609	25.2415	6.3	1.4	1	16.78	0.16	0.64	0.41	2.02	120	12
2021-09-04-22-41-38	2021	9	4	22	41	40.96	35.1608	25.2406	6.45	1.6	1	15.78	0.18	0.55	0.27	1.13	117	26
2021-09-04-23-44-18	2021	9	4	23	45	8.36	35.1421	25.2415	6.03	1.2	1	19.38	0.15	0.65	0.42	18.25	130	11
2021-09-05-00-31-36	2021	9	5	0	31	39.86	35.1842	25.2541	15.97	1.1	1	15.31	0.1	0.78	0.47	14.97	153	11
2021-09-05-01-21-09	2021	9	5	1	21	14.81	35.1468	25.2304	6.58	1.4	1	17.94	0.1	0.57	0.38	17.41	127	11
2021-09-05-01-24-45	2021	9	5	1	24	44.57	35.1549	25.2401	6.65	2.4	1	16.85	0.13	0.4	0.2	0.88	123	35
2021-09-05-21-10-36	2021	9	5	21	11	4.2	35.157	25.2397	6.77	1.6	1	15.28	0.06	0.77	0.47	2.74	152	11
2021-09-06-04-14-05	2021	9	6	4	14	38.99	35.1659	25.2487	13.02	1.4	1	15.43	0.14	0.89	0.53	3.4	150	11
2021-09-07-02-45-48	2021	9	7	2	45	47.51	35.1892	25.264	13.98	1.4	1	13.93	0.04	1.04	0.47	2.63	165	11
2021-09-07-03-15-06	2021	9	7	3	15	6.54	35.1599	25.2401	6.17	2.2	1	16.55	0.09	0.54	0.32	4.35	120	13
2021-09-07-09-32-22	2021	9	7	9	33	2.08	35.1543	25.2456	6.04	1.7	1	16.22	0.06	1.4	0.5	4.64	171	11
2021-09-08-00-38-53	2021	9	8	0	38	54.09	35.1623	25.2415	7.52	1.2	1	16.43	0.08	0.7	0.44	4.03	121	17
2021-09-08-01-47-03	2021	9	8	1	47	6.76	35.1566	25.2335	3.48	1.8	1	16.83	0.14	0.47	0.33	2.41	122	21
2021-09-08-03-59-06	2021	9	8	3	59	25.41	35.171	25.2481	12.75	1.7	1	17.02	0.11	0.56	0.35	2.54	123	13
2021-09-08-09-20-27	2021	9	8	9	20	27.65	35.1519	25.2438	6.93	2	1	17.17	0.2	0.62	0.41	2.58	123	12
2021-09-08-20-17-22	2021	9	8	20	17	22.86	35.1664	25.2492	8.48	1	1	15.42	0.11	0.56	0.37	2.09	117	11
2021-09-08-23-37-47	2021	9	8	23	37	46.8	35.1489	25.2322	7.78	1.9	1	17.72	0.23	0.46	0.33	1.66	127	27
2021-09-09-17-15-05	2021	9	9	17	15	49.32	35.1621	25.2475	10.37	1.6	1	15.78	0.2	0.54	0.35	1.21	117	22
2021-09-09-19-32-29	2021	9	9	19	32	50.8	35.1661	25.2567	12.74	1.4	1	14.57	0.07	1.36	1.48	2.92	268	11
2021-09-10-16-49-39	2021	9	10	16	49	40.16	35.1654	25.2378	7.03	1.8	1	15.58	0.18	0.53	0.35	1.16	118	15
2021-09-11-00-37-06	2021	9	11	0	37	7.27	35.1608	25.2385	5.61	1.4	1	16.81	0.13	0.49	0.38	1.69	122	12
2021-09-11-01-46-03	2021	9	11	1	46	3.22	35.148	25.2305	7.62	2.5	1	17.61	0.27	0.51	0.27	1.71	126	31
2021-09-11-10-44-05	2021	9	11	10	44	36.84	35.1539	25.2335	5.92	2	1	15.05	0.09	0.88	0.59	2.73	157	11
2021-09-12-02-09-59	2021	9	12	2	10	40.08	35.1629	25.2477	8.89	1.8	1	16.77	0.17	0.45	0.29	1.01	122	27
2021-09-12-04-42-00	2021	9	12	4	42	36.09	35.1581	25.2431	8.64	1.4	1	15.75	0.12	0.81	0.56	2.65	149	11
2021-09-12-05-01-02	2021	9	12	5	1	2.69	35.1587	25.2411	8.84	1.7	1	16.15	0.03	1.15	0.81	3.12	147	11
2021-09-12-05-51-11	2021	9	12	5	51	46.89	35.1392	25.2155	4.26	1.1	1	20.35	0.16	0.76	0.52	1.67	137	11
2021-09-12-06-15-22	2021	9	12	6	15	27.83	35.1539	25.2404	7.21	1.8	1	15.39	0.09	1.72	1.25	3.76	159	11
2021-09-12-14-15-13	2021	9	12	14	15	55.07	35.1565	25.243	7.16	1.8	1	12.26	0.17	0.71	0.39	1.49	111	14
2021-09-12-16-23-47	2021	9	12	16	24	19.49	35.1535	25.2387	9.95	1.5	1	15.68	0.1	1.14	0.44	3.07	169	11
2021-09-12-21-07-09	2021	9	12	21	7	9.36	35.1433	25.2395	7.12	2	1	18.37	0.15	0.5	0.3	1.51	128	18
2021-09-14-00-03-27	2021	9	14	0	3	27.43	35.1518	25.2378	5.29	1.6	1	16.94	0.1	0.58	0.33	1.03	123	12
2021-09-14-00-48-52	2021	9	14	0	49	11.3	35.1629	25.2474	9.12	1.3	1	16.13	0.07	0.57	0.38	3.49	119	11
2021-09-14-01-55-58	2021	9	14	1	56	34.15	35.1546	25.2381	4.22	2	1	16.59	0.09	0.63	0.44	14.67	121	11
2021-09-14-06-16-57	2021	9	14	6	17	7.99	35.1689	25.2463	12.21	1.5	1	14.82	0.06	1	0.64	3.09	156	11
2021-09-14-06-37-55	2021	9	14	6	38	24.14	35.1555	25.2414	6.2	1.9	1	16.16	0.07	0.54	0.33	2.09	119	12
2021-09-14-08-42-38	2021	9	14	8	42	37.22	35.1678	25.2484	9.08	2.1	1	16.25	0.14	0.62	0.33	1.21	121	13
2021-09-14-14-11-08	2021	9	14	14	11	9.39	35.1335	25.2599	8.17	2.1	1	17.06	0.22	0.64	0.42	3.11	123	14
2021-09-14-16-39-01	2021	9	14	16	39	1.42	35.1695	25.2436	7.24	2	1	17.95	0.23	0.52	0.28	0.88	123	24
2021-09-14-17-19-57	2021	9	14	17	19	57.76	35.1828	25.2565	6.99	3.6	1	8.44	0.26	0.83	0.31	0.52	136	28
2021-09-14-20-37-10	2021	9	14	20	37	10.92	35.1669	25.2472	8.82	2.5	1	15.89	0.13	0.41	0.24	0.59	117	39
2021-09-14-20-51-43	2021	9	14	20	51	42.66	35.1668	25.2456	11.89	2.6	1	16.32	0.19	0.48	0.25	0.75	121	35
2021-09-15-01-44-35	2021	9	15	1	45	1.1	35.1564	25.2407	10.78	1.4	1	17.04	0.1	0.77	0.46	3.75	145	11
2021-09-15-03-19-12	2021	9	15	3	19	44.85	35.1577	25.2425	9.26	1.7	1	16.71	0.17	0.53	0.28	1.93	120	18
2021-09-15-06-29-01	2021	9	15	6	28	59.84	35.1598	25.2398	6.51	2.4	1	18.18	0.13	0.51	0.38	1.07	127	12
2021-09-15-11-00-12	2021	9	15	11	0	11.18	35.1576	25.2405	6.75	3.2	1	17.4	0.2	0.4	0.29	0.77	124	26
2021-09-15-12-57-06	2021	9	15	12	57	6.3	35.1612	25.2394	7.69	2.6	1	16.4	0.23	0.52	0.3	1.24	121	24
2021-09-15-13-40-33	2021	9	15	13	40	32.67	35.1587	25.2391	6.61	2.4	1	17.54	0.13	0.42	0.33	0.93	124	15
2021-09-15-17-43-49	2021	9	15	17	44	38.28	35.1684	25.2382	6.17	1.4	1	15.29	0.16	0.68	0.46	3.98	117	11
2021-09-15-19-29-55	2021	9	15	19	30	16.72	35.1636	25.2423	7.9	1.9	1	15.69	0.04	0.59	0.39	2.45	122	11
2021-09-15-20-08-14	2021	9	15	20	8	41.46	35.161	25.2426	7.65	1.6	1	17.39	0.17	0.41	0.28	0.72	123	18
2021-09-16-02-09-34	2021	9	16	2	10	32.83	35.1627	25.241	9.84	1.4	1	15.51	0.06	0.64	0.44	16.98	151	11
2021-09-16-03-52-23	2021	9	16	3	52	23.99	35.1602	25.2413	9.54	1.5	1	15.78	0.12	0.67	0.53	15.44	119	11
2021-09-16-04-08-25	2021	9	16	4	8	31.68	35.1643	25.2413	10.01	1.6	1	16.74	0.04	0.79	0.54	3.81	145	11
2021-09-16-08-24-24	2021	9	16	8	24	24.14	35.1458	25.2311	5.18	2.5	1	19.18	0.27	0.72	0.45	2.24	132	17
2021-09-17-20-47-09	2021	9	17	20	47	10.18	35.1594	25.2438	10.06	2.3	1	16.88	0.17	0.38	0.21	0.52	123	42
2021-09-18-11-54-37	2021	9	18	11	54	37.96	35.1432	25.2321	6.88	2.8	1	18.95	0.17	0.36	0.22	1	131	38
2021-09-18-19-19-54	2021	9	18	19	19	54.72	35.1262	25.2293	5.83	1.1	1	20.34	0.19	0.64	0.37	2.31	137	13
2021-09-19-01-30-11	2021	9	19	1	30	12.54	35.1352	25.2803	4.96	1.4	1	19.41	0.14	0.6	0.4	5.31	129	12
2021-09-21-10-01-30	2021	9	21	10	1	30.32	35.1554	25.2398	6.75	1.8	1	16.66	0.12	0.59	0.4	3.24	121	11
2021-09-21-18-21-55	2021	9	21	18	21	56.48	35.1654	25.249	9.05	1.6	1	13.19	0.17	0.46	0.23	0.75	106	32
2021-09-21-18-29-55	2021	9	21	18	29	56.36	35.1661	25.2447	10.02	3	1	16.43	0.16	0.4	0.22	1.1	120	36
2021-09-22-15-36-44	2021	9	22	15	36	44.47	35.1618	25.2384	5.85	2.1	1	16.32	0.18	0.46	0.26	1.26	119	21
2021-09-24-01-24-15	2021	9	24	1	24	14.37	35.1532	25.2617	5.97	3.7	1	19.29	0.16	0.34	0.21	0.51	126	47
2021-09-24-02-30-33	2021	9	24	2	30	33.16	35.1543	25.2595	5.07	1.7	1	18.22	0.31	0.84	0.52	2.53	120	16
2021-09-24-03-36-17	2021	9	24	3	37	0.150002	35.1486	25.2633	5.26	1.9	1	18.44	0.06	0.6	0.41	14.55	120	11
2021-09-24-18-14-51	2021	9	24	18	14	51.52	35.1386	25.2464	5.14	2.3	1	17.46	0.29	0.63	0.34	1.51	122	20
2021-09-25-13-11-13	2021	9	25	13	11	13.12	35.1438	25.2476	6.51	2.1	1	19.69	0.14	0.74	0.45	18.39	130	11
2021-09-27-06-17-21	2021	9	27	6	17	21.16	35.1413	25.2729	4.21	6	4	20.21	0.35	0.45	0.24	0.67	128	132
2021-09-27-06-22-15	2021	9	27	6	22	13.66	35.1884	25.2733	6.92	3.6	3	16.33	0.13	0.43	0.3	0.76	114	20
2021-09-27-06-27-50	2021	9	27	6	27	48.52	35.1729	25.316	3.83	3.7	3	18.93	0.24	0.52	0.26	0.7	118	34
2021-09-27-06-37-44	2021	9	27	6	37	43.38	35.1286	25.2683	4.09	4.3	4	20.55	0.41	0.5	0.31	1.05	132	55
2021-09-27-06-43-01	2021	9	27	6	43	1.46	35.1168	25.2282	5.3	2.9	4	37.5	0.24	1.88	0.53	3.68	172	16
2021-09-27-06-45-46	2021	9	27	6	45	45.53	35.1698	25.2375	11.03	3.1	2	16.9	0.12	0.82	0.42	2.61	172	17
2021-09-27-07-07-19	2021	9	27	7	7	19.34	35.1458	25.3152	3.21	3.1	4	17.57	0.49	0.79	0.42	2.25	126	35
2021-09-27-07-08-19	2021	9	27	7	8	19.98	35.1314	25.2348	10.53	3.2	4	19.82	0.29	0.52	0.32	1.1	132	30
2021-09-27-07-09-18	2021	9	27	7	9	18.54	35.1394	25.2704	5.7	3.3	4	19.95	0.24	0.5	0.28	1.27	126	23
2021-09-27-07-11-06	2021	9	27	7	11	6.33	35.1314	25.2715	5.91	3.5	4	20.41	0.37	0.67	0.37	2.47	132	29
2021-09-27-07-12-05	2021	9	27	7	12	5.77	35.1542	25.307	8.22	3.4	4	19.46	0.51	0.91	0.55	2.59	123	26
2021-09-27-07-22-23	2021	9	27	7	22	22.63	35.1151	25.2622	4.88	3.3	4	21	0.25	0.57	0.29	0.82	134	27
2021-09-27-07-30-45	2021	9	27	7	30	45.52	35.1365	25.2472	9.61	4.5	4	19.59	0.33	0.47	0.26	1.32	130	48
2021-09-27-07-42-22	2021	9	27	7	42	22.95	35.1609	25.2335	13.68	2.8	2	16.4	0.21	0.52	0.29	1.09	123	23
2021-09-27-07-44-41	2021	9	27	7	44	41.24	35.1417	25.2219	13.34	3.8	4	17.84	0.32	0.48	0.27	0.81	129	53
2021-09-27-07-46-32	2021	9	27	7	46	31.06	35.1434	25.2074	15.05	4.2	4	16.49	0.42	0.59	0.36	0.78	126	54
2021-09-27-07-47-24	2021	9	27	7	47	25.06	35.1265	25.1973	12.82	4.1	4	20.36	0.37	0.68	0.39	2.48	138	31
2021-09-27-07-56-03	2021	9	27	7	56	3.89	35.1208	25.2293	4.71	3.3	4	19.94	0.29	0.52	0.33	1.07	133	26
2021-09-27-08-16-23	2021	9	27	8	16	22.96	35.1603	25.2584	10.38	2.8	2	17.88	0.35	0.61	0.4	1.27	123	20
2021-09-27-08-21-57	2021	9	27	8	21	57.79	35.1656	25.3073	4.16	4.4	3	19.58	0.37	0.5	0.29	1.25	119	59
2021-09-27-08-28-41	2021	9	27	8	29	35.9	35.1228	25.2429	6.81	3.1	4	18.42	0.44	0.8	0.43	2.41	125	25
2021-09-27-08-34-30	2021	9	27	8	34	29.33	35.1391	25.1985	13.12	3.2	4	20.29	0.43	0.81	0.39	1.96	137	33
2021-09-27-08-45-30	2021	9	27	8	45	29.21	35.1358	25.2434	4.16	3	4	23.52	0.15	0.63	0.32	1.24	130	15
2021-09-27-08-56-37	2021	9	27	8	56	36.57	35.1239	25.241	6.91	3.1	4	20.21	0.44	0.71	0.43	1.33	135	29
2021-09-27-08-58-19	2021	9	27	8	58	19.77	35.1532	25.2709	4.43	3.1	2	19.37	0.46	0.76	0.42	1.96	123	28
2021-09-27-09-02-49	2021	9	27	9	2	48.77	35.1415	25.225	5.73	2.8	4	22.61	0.26	0.79	0.37	1.73	153	19
2021-09-27-09-12-36	2021	9	27	9	12	34.8	35.1497	25.2174	12.94	3	4	17.28	0.44	0.68	0.42	2.22	127	32
2021-09-27-10-18-41	2021	9	27	10	18	41.21	35.138	25.2829	3.38	2.8	4	20.3	0.34	0.74	0.43	1.14	126	20
2021-09-27-10-21-34	2021	9	27	10	21	34.63	35.13	25.2437	7.47	2.3	4	19.77	0.3	0.54	0.31	1.26	131	25
2021-09-27-10-23-11	2021	9	27	10	23	11.97	35.1292	25.2816	7.63	4	4	20.26	0.41	0.64	0.32	1.53	132	41
2021-09-27-10-27-12	2021	9	27	10	27	25.07	35.1608	25.2488	14	2.4	2	17.92	0.1	0.58	0.4	2.04	123	11
2021-09-27-10-34-22	2021	9	27	10	34	20.99	35.1351	25.2716	4.25	3.9	4	20.55	0.38	0.53	0.29	1.32	130	45
2021-09-27-10-48-32	2021	9	27	10	48	31.9	35.1511	25.2256	7.8	2.7	4	20.5	0.45	0.76	0.44	1.98	134	25
2021-09-27-11-01-43	2021	9	27	11	1	42.06	35.1677	25.2515	9.65	2.7	2	18.22	0.41	0.8	0.43	2.3	128	25
2021-09-27-11-02-26	2021	9	27	11	2	25.95	35.1679	25.2502	8.13	4.7	2	16.7	0.32	0.41	0.25	0.61	118	49
2021-09-27-11-27-34	2021	9	27	11	27	33.97	35.1309	25.2285	6.59	2.9	4	18.41	0.37	0.67	0.4	1.55	127	28
2021-09-27-11-45-19	2021	9	27	11	45	54.59	35.1414	25.2449	14.6	2.7	4	23.46	0.11	0.74	0.65	4.82	155	11
2021-09-27-11-50-00	2021	9	27	11	49	59.82	35.1343	25.2242	4.8	3	4	18.6	0.25	0.46	0.31	0.84	128	21
2021-09-27-12-02-25	2021	9	27	12	2	26.18	35.1748	25.2795	6.82	3.5	2	17.6	0.36	0.53	0.3	1.33	115	59
2021-09-27-12-07-09	2021	9	27	12	7	9.9	35.1402	25.2384	10.46	2.7	4	20.02	0.15	0.61	0.38	2.36	136	13
2021-09-27-12-18-53	2021	9	27	12	18	53.54	35.1929	25.3006	10.12	2.9	3	17.71	0.33	0.57	0.32	1.45	110	41
2021-09-27-12-20-11	2021	9	27	12	20	11.69	35.1345	25.2363	6.68	2.5	4	19.44	0.26	0.69	0.52	21.86	131	13
2021-09-27-12-31-47	2021	9	27	12	31	47.3	35.1868	25.306	6.19	3.7	3	16.57	0.41	0.56	0.35	1.73	109	73
2021-09-27-13-06-53	2021	9	27	13	6	53.07	35.1546	25.2266	14.46	2	4	19.76	0.13	0.43	0.3	2.25	134	17
2021-09-27-13-08-09	2021	9	27	13	8	9.4	35.1303	25.2683	7.41	2.7	4	20.65	0.35	0.57	0.32	1.43	133	35
2021-09-27-13-15-08	2021	9	27	13	15	59.88	35.1374	25.2288	6.4	2.3	4	17.88	0.17	0.69	0.39	1.3	125	11
2021-09-27-13-22-26	2021	9	27	13	22	26.76	35.1333	25.2315	10.09	2.9	4	19.44	0.28	0.5	0.27	1.12	133	43
2021-09-27-14-01-20	2021	9	27	14	1	20.56	35.179	25.2794	8.16	3.3	3	17.35	0.38	0.48	0.31	1.13	116	43
2021-09-27-14-12-54	2021	9	27	14	12	54.06	35.1613	25.2449	11.87	2.9	4	17.08	0.26	0.52	0.26	1.97	127	35
2021-09-27-14-22-46	2021	9	27	14	22	46.96	35.1334	25.2301	10.48	3.6	4	18.9	0.28	0.45	0.26	0.95	130	58
2021-09-27-14-31-32	2021	9	27	14	32	8.31	35.197	25.3093	4.66	2.3	3	17.05	0.12	0.55	0.34	1.66	118	12
2021-09-27-14-35-13	2021	9	27	14	35	13.41	35.139	25.2345	4.79	3.6	4	19.25	0.31	0.56	0.28	1.54	131	53
2021-09-27-14-47-21	2021	9	27	14	47	21.43	35.1682	25.2559	10.91	1.9	2	16.26	0.25	0.57	0.35	1.73	118	18
2021-09-27-14-49-27	2021	9	27	14	49	27.13	35.1413	25.2699	10.44	3.7	4	19.93	0.28	0.49	0.29	0.74	127	78
2021-09-27-14-50-16	2021	9	27	14	50	16.95	35.1369	25.2472	5.63	3.1	4	18.98	0.12	0.59	0.3	1.46	128	18
2021-09-27-14-59-58	2021	9	27	14	59	58.12	35.125	25.2517	6.11	2.6	4	20.05	0.22	0.46	0.27	1.35	131	28
2021-09-27-15-08-24	2021	9	27	15	8	24.38	35.1357	25.2309	4.73	2.5	4	19.18	0.26	0.47	0.29	1.51	132	26
2021-09-27-15-26-55	2021	9	27	15	26	54.81	35.1295	25.2384	5.14	2.9	4	18.67	0.36	0.61	0.34	1.6	129	32
2021-09-27-15-49-49	2021	9	27	15	49	48.54	35.1411	25.2273	6.08	2.5	4	19.76	0.12	0.51	0.35	1.6	133	16
2021-09-27-15-53-18	2021	9	27	15	53	54.14	35.1878	25.3056	6.59	2.7	3	17.66	0.34	0.75	0.36	1.87	111	26
2021-09-27-16-15-30	2021	9	27	16	15	30.12	35.1515	25.2637	10.53	3.5	2	18.8	0.38	0.55	0.29	1.35	125	72
2021-09-27-16-27-09	2021	9	27	16	27	9.49	35.1633	25.2367	15.01	2.1	2	16.07	0.22	0.54	0.4	0.82	119	21
2021-09-27-16-55-07	2021	9	27	16	55	7.02	35.1398	25.2279	5.6	2.7	4	18.78	0.35	0.62	0.36	2.18	130	29
2021-09-27-17-48-27	2021	9	27	17	48	29.32	35.1195	25.2578	3.83	2.3	4	21.82	0.12	0.78	0.36	1.79	133	12
2021-09-27-18-05-05	2021	9	27	18	5	4.68	35.127	25.2707	6.47	2.4	4	20.96	0.3	0.54	0.31	1.37	134	32
2021-09-27-18-12-14	2021	9	27	18	12	14.64	35.1904	25.2997	6.97	2.9	3	17.07	0.31	0.47	0.29	0.74	108	40
2021-09-27-18-15-44	2021	9	27	18	15	44.38	35.1353	25.2286	3.85	3.9	4	19.09	0.31	0.43	0.26	1.15	130	105
2021-09-27-18-25-06	2021	9	27	18	25	5.6	35.125	25.2475	3.53	2.6	4	20.56	0.26	0.55	0.41	1.23	135	19
2021-09-27-18-37-43	2021	9	27	18	37	43.6	35.1299	25.2512	5.06	2.3	4	20.19	0.28	0.63	0.42	2.39	132	17
2021-09-27-19-05-58	2021	9	27	19	5	57	35.1959	25.3067	6.14	2.4	3	16.6	0.2	0.46	0.31	0.82	108	19
2021-09-27-19-08-20	2021	9	27	19	8	20.32	35.1353	25.2379	6.76	1.9	4	19.91	0.19	0.54	0.33	2.56	133	17
2021-09-27-19-26-40	2021	9	27	19	26	41.4	35.149	25.2373	12.33	2.1	4	18.11	0.33	0.89	0.44	1.96	128	17
2021-09-27-19-27-46	2021	9	27	19	27	46	35.1992	25.308	7.86	1.4	3	17.91	0.13	0.87	0.45	16.82	144	11
2021-09-27-19-28-25	2021	9	27	19	28	26.38	35.1242	25.2397	11.32	2	2	23.23	0.24	0.93	0.83	8.47	120	13
2021-09-27-19-29-44	2021	9	27	19	29	44.4	35.1385	25.2413	11.43	1.6	4	20.16	0.27	0.89	0.68	26.63	136	11
2021-09-27-19-30-57	2021	9	27	19	30	57.72	35.1699	25.2952	7.86	1.6	3	19.07	0.4	0.96	0.63	32.91	120	12
2021-09-27-19-47-42	2021	9	27	19	47	42.36	35.1772	25.2818	8.87	2.7	2	17	0.24	0.54	0.3	1.44	116	26
2021-09-27-19-54-03	2021	9	27	19	54	1	35.1313	25.2314	2.29	2.5	4	22.6	0.1	0.56	0.44	1.13	161	16
2021-09-27-20-10-00	2021	9	27	20	10	0.760002	35.1292	25.2356	5.95	4.4	4	19.2	0.29	0.55	0.31	1.69	130	47
2021-09-27-20-37-24	2021	9	27	20	37	23.44	35.1366	25.2293	4.32	2.8	4	19	0.22	0.42	0.3	0.85	131	25
2021-09-27-20-40-12	2021	9	27	20	40	11.6	35.1861	25.3034	5.91	2.3	3	18.07	0.12	0.54	0.35	0.89	113	13
2021-09-27-20-44-11	2021	9	27	20	44	10.92	35.2075	25.3082	18.06	2.8	3	17.5	0.14	0.67	0.39	1.38	121	13
2021-09-27-20-56-42	2021	9	27	20	56	41.9	35.1763	25.28	7.69	3.2	2	17.52	0.34	0.54	0.31	0.83	114	30
2021-09-27-21-15-42	2021	9	27	21	15	42.36	35.1372	25.2509	8.02	2.4	4	20.18	0.07	0.56	0.37	17	132	11
2021-09-27-21-29-21	2021	9	27	21	29	20.76	35.1325	25.25	4.6	3.4	4	19.98	0.3	0.52	0.3	0.77	131	32
2021-09-27-21-35-41	2021	9	27	21	35	42.28	35.1366	25.2311	10.4	2.9	4	19.56	0.11	0.49	0.32	2.68	132	17
2021-09-27-21-37-11	2021	9	27	21	37	10.88	35.1922	25.3183	5.48	4.5	3	18.83	0.23	0.43	0.25	0.7	110	44
2021-09-27-21-45-59	2021	9	27	21	45	57.84	35.1131	25.278	1.66	2.6	4	23.94	0.55	2.34	1.1	3.94	162	16
2021-09-27-21-49-56	2021	9	27	21	49	56.12	35.1434	25.2463	7.62	2.7	4	22.37	0.24	1.17	0.35	1.8	153	19
2021-09-27-22-06-44	2021	9	27	22	6	44.06	35.1351	25.2269	4.17	2.6	4	19.18	0.18	0.56	0.36	1.67	132	17
2021-09-27-22-14-28	2021	9	27	22	14	27.8	35.1367	25.2384	8.01	2.5	4	19.17	0.18	0.5	0.35	1.12	131	14
2021-09-27-23-13-41	2021	9	27	23	13	41.76	35.1303	25.2734	4.79	3.5	4	20.37	0.12	0.42	0.24	2.69	131	35
2021-09-27-23-26-27	2021	9	27	23	26	27.96	35.1384	25.2233	5.2	3.2	4	20.11	0.37	0.68	0.38	2.18	135	35
2021-09-27-23-29-49	2021	9	27	23	29	50.36	35.1362	25.2282	8.51	3.5	4	18.46	0.23	0.47	0.3	1.5	131	34
2021-09-27-23-31-08	2021	9	27	23	31	8.2	35.1326	25.2437	5.09	2.3	4	20.23	0.16	0.49	0.35	17.19	132	12
2021-09-27-23-31-40	2021	9	27	23	31	40.62	35.1579	25.2641	2.01	2.2	2	18.4	0.14	0.57	0.4	1.26	119	12
2021-09-27-23-44-08	2021	9	27	23	44	8.9	35.1348	25.23	5.24	2.5	4	19.67	0.4	0.72	0.51	2.31	133	23
2021-09-27-23-45-12	2021	9	27	23	45	12.2	35.1654	25.2588	10.01	2.2	2	17.07	0.18	0.55	0.29	1.34	120	17
2021-09-27-23-51-24	2021	9	27	23	51	24.74	35.1332	25.2464	4.46	1.8	4	20.33	0.19	0.68	0.45	17.8	133	13
2021-09-27-23-52-48	2021	9	27	23	52	49.12	35.1206	25.2358	13.25	1.6	4	19.21	0.17	0.54	0.36	17.96	130	12
2021-09-27-23-56-47	2021	9	27	23	56	47.16	35.1387	25.2297	6.98	2.4	4	18.07	0.33	0.86	0.47	2.47	129	15
2021-09-28-00-16-29	2021	9	28	0	16	30.16	35.1623	25.2144	0.12	2.1	2	17.86	0.34	0.9	0.62	2.75	175	14
2021-09-28-00-18-18	2021	9	28	0	18	19.26	35.1338	25.2286	6.2	2.1	4	18.55	0.08	0.57	0.37	2.24	127	11
2021-09-28-00-49-32	2021	9	28	0	49	32.72	35.1968	25.3048	4.22	2.5	3	17.25	0.2	0.51	0.27	1.35	111	38
2021-09-28-00-54-27	2021	9	28	0	54	28.27	35.1286	25.2619	5.27	3	4	21.08	0.11	0.4	0.22	0.61	134	29
2021-09-28-01-18-56	2021	9	28	1	19	46.22	35.1341	25.2242	5.01	2.6	4	19.37	0.08	0.39	0.27	2.76	132	15
2021-09-28-02-16-08	2021	9	28	2	16	31.93	35.1881	25.3154	5.36	2.4	3	19.68	0.08	0.5	0.28	0.69	113	13
2021-09-28-03-03-39	2021	9	28	3	3	40.4	35.133	25.2244	6.57	3	4	18.87	0.15	0.43	0.28	1.79	130	20
2021-09-28-03-16-55	2021	9	28	3	16	54.77	35.1735	25.3242	5.06	2.5	3	18.44	0.09	0.48	0.33	0.72	115	14
2021-09-28-04-16-47	2021	9	28	4	17	15.45	35.1555	25.2544	12.17	2.2	2	18.51	0.08	0.48	0.3	1.96	124	14
2021-09-28-04-23-18	2021	9	28	4	23	17.93	35.1631	25.2384	7.89	2.6	2	15.91	0.17	0.44	0.31	2.4	119	29
2021-09-28-04-29-57	2021	9	28	4	30	14.37	35.1995	25.3134	5.23	2	3	16.65	0.19	0.53	0.3	1.54	116	15
2021-09-28-04-48-08	2021	9	28	4	48	9	35.1417	25.2287	10.29	5.3	4	18.72	0.21	0.39	0.23	1.23	129	110
2021-09-28-04-59-36	2021	9	28	4	59	36.35	35.1787	25.234	10.97	2.9	2	13.96	0.14	0.55	0.31	1.97	113	32
2021-09-28-05-11-10	2021	9	28	5	11	10.47	35.1532	25.2567	10.05	3.2	2	18.53	0.13	0.37	0.22	1.59	124	35
2021-09-28-05-12-33	2021	9	28	5	12	33.93	35.1526	25.2422	11.73	2.5	4	18.74	0.13	0.93	0.51	2.71	126	11
2021-09-28-05-14-51	2021	9	28	5	14	49.98	35.1673	25.2567	14.64	3.2	2	17.46	0.16	0.38	0.22	1.14	117	37
2021-09-28-05-15-28	2021	9	28	5	15	28.43	35.1588	25.2538	9.43	2.3	2	18.29	0.15	0.71	0.49	1.14	174	12
2021-09-28-05-22-01	2021	9	28	5	22	0.889999	35.1573	25.2346	10.75	2.9	2	17.43	0.18	0.47	0.28	1.75	123	36
2021-09-28-05-27-10	2021	9	28	5	27	9.1	35.1618	25.2296	13.95	2.6	2	18.34	0.16	0.44	0.3	1.4	129	35
2021-09-28-05-32-27	2021	9	28	5	32	27.02	35.1425	25.2312	11.51	2.5	4	24.47	0.1	0.49	1	10.5	157	19
2021-09-28-06-17-35	2021	9	28	6	17	39.23	35.1344	25.2404	5.52	2.4	4	19.15	0.15	0.5	0.33	6.2	130	14
2021-09-28-06-25-48	2021	9	28	6	25	47.63	35.1392	25.2258	6.66	3.3	4	17.44	0.09	0.29	0.24	0.62	127	35
2021-09-28-06-40-22	2021	9	28	6	40	22.36	35.1918	25.3082	7.95	2.3	3	17.25	0.17	0.53	0.26	1.35	112	22
2021-09-28-06-43-15	2021	9	28	6	44	13.2	35.1387	25.2265	11.28	2.8	4	17.89	0.39	0.68	0.39	2.62	126	26
2021-09-28-06-50-35	2021	9	28	6	50	33.74	35.126	25.2543	6.1	2.8	4	21.53	0.33	0.53	0.35	3.37	137	25
2021-09-28-06-52-12	2021	9	28	6	52	11.68	35.1588	25.2291	10.14	3.3	2	16.2	0.14	0.41	0.27	1.87	121	47
2021-09-28-07-22-34	2021	9	28	7	22	34.17	35.137	25.2269	6.73	3	4	18.66	0.14	0.37	0.27	2.9	130	21
2021-09-28-07-22-52	2021	9	28	7	22	53.04	35.1527	25.3085	4.98	3.3	4	18.83	0.14	0.71	0.43	15.86	129	12
2021-09-28-07-28-04	2021	9	28	7	28	4.13	35.1776	25.324	5.48	3.8	3	18.65	0.1	0.38	0.21	0.55	115	57
2021-09-28-07-39-37	2021	9	28	7	39	36.71	35.1359	25.2282	4.48	3.3	4	19.01	0.12	0.35	0.23	1.15	131	24
2021-09-28-07-40-49	2021	9	28	7	40	49.37	35.1174	25.2336	8.07	2.2	4	21.51	0.21	0.76	0.54	3.15	138	11
2021-09-28-07-42-30	2021	9	28	7	42	29.51	35.1473	25.2318	11.94	2.9	4	17.21	0.13	0.39	0.27	2.54	124	36
2021-09-28-08-17-10	2021	9	28	8	17	9.71	35.1629	25.3235	5.19	3.6	3	18.29	0.12	0.42	0.22	3.09	117	39
2021-09-28-08-18-25	2021	9	28	8	18	26.28	35.1414	25.2323	8.91	3.3	4	18.83	0.14	0.41	0.22	3.56	130	20
2021-09-28-08-20-23	2021	9	28	8	20	22.27	35.14	25.2354	4.73	3.8	4	17.43	0.22	0.42	0.24	1.26	123	51
2021-09-28-08-26-54	2021	9	28	8	26	52.9	35.139	25.2288	11.98	2.9	4	19.29	0.2	0.46	0.28	3.47	131	35
2021-09-28-08-28-15	2021	9	28	8	28	15.06	35.1383	25.2446	8.72	2.2	4	18.27	0.22	0.67	0.48	20.73	125	12
2021-09-28-08-29-06	2021	9	28	8	29	5.63	35.1344	25.2251	8.07	3.4	4	19.16	0.11	0.42	0.37	2.47	130	38
2021-09-28-08-34-13	2021	9	28	8	34	15.11	35.138	25.2361	5.28	3.6	4	16.89	0.19	0.45	0.26	1.23	122	45
2021-09-28-08-36-33	2021	9	28	8	36	33.23	35.1892	25.3123	4.32	2	3	17.11	0.24	0.8	0.45	25.73	114	13
2021-09-28-08-39-17	2021	9	28	8	39	16.21	35.1479	25.2412	7.01	3.3	4	19.38	0.07	0.31	0.25	1.4	131	34
2021-09-28-09-32-39	2021	9	28	9	33	25.25	35.141	25.244	6.66	2.5	4	20.13	0.1	0.37	0.22	0.62	133	16
2021-09-28-09-51-41	2021	9	28	9	52	17.42	35.1486	25.242	15.13	2.3	4	19.69	0.1	0.46	0.28	2.7	133	17
2021-09-28-10-29-45	2021	9	28	10	29	44.86	35.1874	25.3024	8.05	2.3	3	6.52	0.17	0.55	0.27	1.37	113	23
2021-09-28-10-31-09	2021	9	28	10	31	10	35.1342	25.2366	12.54	1.9	4	19.56	0.55	1.04	0.67	25.97	132	13
2021-09-28-10-35-39	2021	9	28	10	35	40.13	35.1475	25.2295	10.69	2.5	4	9.24	0.14	0.33	0.27	1.26	129	28
2021-09-28-11-02-42	2021	9	28	11	2	42.51	35.1316	25.271	8.19	2.3	4	10.59	0.17	0.47	0.32	1.58	129	20
2021-09-28-11-38-25	2021	9	28	11	38	25.55	35.1351	25.2272	6.37	2.2	4	18.2	0.13	0.49	0.37	13.77	128	13
2021-09-28-11-39-12	2021	9	28	11	39	13.28	35.1375	25.2263	7.92	2.9	4	19.26	0.12	0.5	0.31	2.76	133	20
2021-09-28-12-05-13	2021	9	28	12	5	13.53	35.1614	25.2519	9.98	2.6	2	6.61	0.11	0.3	0.41	0.72	80	22
2021-09-28-12-08-09	2021	9	28	12	8	9.71	35.1943	25.3048	6.81	2.5	3	6.08	0.17	0.37	0.24	1.07	118	23
2021-09-28-12-09-50	2021	9	28	12	9	50.65	35.165	25.2563	9.06	3.9	2	7.24	0.13	0.3	0.21	0.66	77	87
2021-09-28-12-25-17	2021	9	28	12	25	17.53	35.1373	25.2271	8.66	2.9	4	6.34	0.11	0.31	0.23	0.62	79	38
2021-09-28-12-29-44	2021	9	28	12	29	44.4	35.1843	25.3087	6.64	3.3	3	7.88	0.1	0.29	0.2	0.31	112	41
2021-09-28-12-34-00	2021	9	28	12	34	46.78	35.1662	25.2573	10.72	2.4	4	19.08	0.09	0.33	0.27	0.8	129	14
2021-09-28-13-02-21	2021	9	28	13	2	21.6	35.134	25.2605	8.31	3.2	4	6.54	0.2	0.32	0.22	0.65	76	44
2021-09-28-13-26-50	2021	9	28	13	26	50.71	35.1352	25.2255	8.83	3.1	4	6.98	0.1	0.36	0.28	0.61	89	32
2021-09-28-13-53-25	2021	9	28	13	53	26.06	35.1854	25.3043	7.8	2.5	3	7.23	0.13	0.42	0.25	1.01	112	35
2021-09-28-14-00-09	2021	9	28	14	0	9.77	35.1953	25.3046	7.14	2.9	3	4.57	0.12	0.31	0.27	0.68	122	33
2021-09-28-15-13-15	2021	9	28	15	13	15.55	35.1509	25.2563	8.97	4.5	2	8.28	0.1	0.31	0.23	0.64	78	112
2021-09-28-15-34-30	2021	9	28	15	34	30.13	35.1359	25.2288	9.97	2.2	4	7.19	0.14	0.36	0.3	0.64	85	19
2021-09-28-16-12-32	2021	9	28	16	12	32.74	35.13	25.2361	8.55	2.7	4	10.63	0.08	0.3	0.22	1.11	133	36
2021-09-28-16-36-48	2021	9	28	16	36	48.13	35.1825	25.2799	8.77	2.6	2	7.3	0.11	0.31	0.23	0.49	118	21
2021-09-28-16-38-29	2021	9	28	16	38	29.51	35.1824	25.2833	8.48	1.8	2	6.61	0.09	0.5	0.38	1.16	116	19
2021-09-28-16-50-23	2021	9	28	16	50	23.3	35.1511	25.2283	10.99	1.8	4	8.33	0.1	0.51	0.32	0.84	135	19
2021-09-28-16-55-40	2021	9	28	16	55	40.21	35.1386	25.2274	10.14	2.7	4	10.74	0.08	0.34	0.25	1.14	134	31
2021-09-28-17-22-58	2021	9	28	17	22	58.86	35.1372	25.2308	9.28	2.5	4	8.15	0.11	0.38	0.27	0.73	155	23
2021-09-28-17-52-57	2021	9	28	17	52	57.88	35.158	25.2423	10.51	2.6	2	7.92	0.11	0.33	0.23	0.67	68	31
2021-09-28-18-00-29	2021	9	28	18	0	29.36	35.1593	25.2754	7.55	1.4	2	7.72	0.12	0.41	0.55	0.99	88	14
2021-09-28-18-02-50	2021	9	28	18	2	51.08	35.1961	25.3036	7.65	2.5	3	5.26	0.11	0.4	0.3	0.76	118	28
2021-09-28-18-20-48	2021	9	28	18	21	21.96	35.1423	25.223	9.52	2.6	4	7.34	0.11	0.22	0.21	0.23	79	30
2021-09-28-18-56-02	2021	9	28	18	56	2.74	35.1945	25.3055	6.98	3	3	5.88	0.11	0.56	0.32	0.99	117	38
2021-09-28-19-47-03	2021	9	28	19	47	3.32	35.1627	25.2351	11.63	2.6	2	7.66	0.09	0.42	0.28	0.71	124	35
2021-09-28-20-10-40	2021	9	28	20	10	40.76	35.1249	25.2455	8.1	1.8	4	8.02	0.13	0.38	0.23	1.97	138	22
2021-09-28-20-19-01	2021	9	28	20	19	1.98	35.1397	25.2555	9.2	2.3	4	6.75	0.12	0.42	0.23	0.7	129	29
2021-09-28-20-22-45	2021	9	28	20	22	45.96	35.1599	25.2367	11.07	2.4	2	7.53	0.12	0.37	0.26	0.67	123	34
2021-09-28-20-39-00	2021	9	28	20	38	59.96	35.1678	25.3075	6.56	2.1	3	3.45	0.13	0.41	0.23	0.69	109	36
2021-09-28-20-48-42	2021	9	28	20	48	42.84	35.1423	25.2275	9.4	1.9	4	7.38	0.12	0.36	0.24	0.87	135	33
2021-09-28-20-55-27	2021	9	28	20	55	27.72	35.1801	25.2771	7.92	2.2	3	6.03	0.16	0.42	0.25	0.63	108	33
2021-09-28-21-10-02	2021	9	28	21	10	2.68	35.1893	25.2558	10.62	1.4	2	5.68	0.14	0.45	0.3	0.77	114	19
2021-09-28-21-15-43	2021	9	28	21	15	43.72	35.1356	25.2286	9.48	2.6	4	8.79	0.15	0.38	0.23	0.7	130	23
2021-09-28-21-25-16	2021	9	28	21	25	16.98	35.1363	25.2292	7.4	2.3	4	9.37	0.11	0.3	0.21	0.37	131	35
2021-09-28-21-26-13	2021	9	28	21	26	13.8	35.1462	25.2694	8.17	2.1	2	4.95	0.12	0.39	0.22	0.71	126	32
2021-09-28-21-59-59	2021	9	28	21	59	59.32	35.174	25.2983	7.77	1.9	3	4.36	0.11	0.44	0.24	0.64	114	33
2021-09-28-22-30-49	2021	9	28	22	30	49.54	35.1329	25.2493	8	2.3	4	6.96	0.13	0.37	0.23	0.91	130	28
2021-09-28-22-32-20	2021	9	28	22	32	20.24	35.203	25.3181	7.04	3	3	6.26	0.1	0.33	0.18	0.57	117	47
2021-09-28-22-42-20	2021	9	28	22	42	20.44	35.1857	25.2969	7.8	2.3	3	5.15	0.11	0.36	0.2	0.57	107	31
2021-09-28-22-44-45	2021	9	28	22	44	45.4	35.1676	25.2475	10.93	2.5	2	7.44	0.13	0.36	0.22	0.63	123	38
2021-09-28-22-45-57	2021	9	28	22	45	57.74	35.172	25.3031	8.36	2.5	3	3.68	0.1	0.41	0.22	0.63	111	34
2021-09-28-22-56-53	2021	9	28	22	56	53.46	35.1633	25.3226	6.02	2.3	3	1.55	0.15	0.38	0.22	0.66	101	36
2021-09-28-22-57-16	2021	9	28	22	57	16.92	35.1355	25.1963	8.49	3.4	4	12.34	0.12	0.35	0.24	0.94	136	48
2021-09-28-23-05-47	2021	9	28	23	5	47.6	35.1354	25.2293	9.43	2.6	4	8.09	0.11	0.3	0.21	0.56	130	39
2021-09-28-23-16-52	2021	9	28	23	16	53.04	35.1382	25.2244	9.52	2.7	4	8.26	0.12	0.31	0.21	0.61	129	43
2021-09-28-23-24-07	2021	9	28	23	24	7.8	35.1862	25.3001	7.76	2	3	5.41	0.11	0.45	0.22	0.67	111	29
2021-09-28-23-36-03	2021	9	28	23	36	2.52	35.1952	25.3066	7.53	2.6	3	6	0.11	0.41	0.23	0.71	116	40
2021-09-29-00-10-28	2021	9	29	0	10	28.58	35.1967	25.3052	7.29	2.7	3	6.17	0.13	0.41	0.23	0.56	116	40
2021-09-29-00-14-17	2021	9	29	0	14	17.55	35.1759	25.2481	9.69	2.4	2	5.52	0.1	0.33	0.2	0.58	116	46
2021-09-29-00-17-03	2021	9	29	0	17	2.96	35.1348	25.2248	9.32	3.2	4	7.81	0.1	0.33	0.2	0.86	133	44
2021-09-29-00-29-40	2021	9	29	0	29	40.15	35.1396	25.2529	8.87	1.4	4	7.42	0.1	0.57	0.35	0.87	131	12
2021-09-29-01-18-17	2021	9	29	1	18	17.78	35.1969	25.313	6.91	1.7	3	6.74	0.2	0.6	0.4	1.38	122	11
2021-09-29-01-19-03	2021	9	29	1	19	3.62	35.1856	25.3005	7.82	2.3	3	5.75	0.12	0.39	0.23	0.63	112	26
2021-09-29-01-29-26	2021	9	29	1	29	26.44	35.1531	25.2465	10.49	3	4	7.55	0.13	0.37	0.23	0.59	125	44
2021-09-29-02-02-23	2021	9	29	2	2	23.72	35.1869	25.3018	7.96	2.2	3	5.85	0.15	0.4	0.24	0.6	111	37
2021-09-29-02-17-15	2021	9	29	2	17	15.01	35.1874	25.256	9.16	2.2	2	3.16	0.46	0.82	0.48	1.22	105	20
2021-09-29-02-19-10	2021	9	29	2	19	10.93	35.1352	25.229	9.45	2.6	4	7.83	0.13	0.38	0.25	0.61	134	38
2021-09-29-03-07-48	2021	9	29	3	7	48.33	35.1239	25.2446	7.84	2.5	4	8.54	0.14	0.39	0.21	1.45	139	31
2021-09-29-03-51-03	2021	9	29	3	51	3.93	35.1214	25.2433	8.49	2.4	4	8.17	0.49	0.7	0.48	2.74	127	20
2021-09-29-04-06-33	2021	9	29	4	6	33.88	35.1796	25.2877	7.68	3.2	3	17.02	0.11	0.36	0.21	1.25	114	49
2021-09-29-04-19-29	2021	9	29	4	19	29.58	35.1353	25.2315	9.34	2.8	4	8.47	0.29	0.55	0.29	0.84	126	30
2021-09-29-04-30-18	2021	9	29	4	30	17.38	35.1352	25.2418	10.81	2.5	4	35.92	0.11	0.88	0.33	3.62	157	17
2021-09-29-05-51-52	2021	9	29	5	51	51.88	35.1431	25.2264	9.73	3.4	4	18.41	0.08	0.41	0.27	2.03	130	35
2021-09-29-06-04-04	2021	9	29	6	4	4.17	35.1348	25.2261	9.61	3	4	6.54	0.1	0.31	0.22	0.48	85	27
2021-09-29-06-09-00	2021	9	29	6	9	17	35.1945	25.3053	7.6	2.6	3	16.67	0.08	0.57	0.4	3.03	115	12
2021-09-29-06-13-31	2021	9	29	6	14	22.67	35.1531	25.2211	11.28	2.6	4	17.94	0.09	0.5	0.37	2.42	128	12
2021-09-29-07-02-54	2021	9	29	7	2	53	35.1951	25.311	6.81	2.7	3	17.43	0.08	0.46	0.29	0.67	116	15
2021-09-29-08-34-33	2021	9	29	8	34	32.5	35.1943	25.3129	7.86	3	3	6.23	0.1	0.35	0.22	0.7	115	32
2021-09-29-08-40-56	2021	9	29	8	40	56.88	35.1507	25.2381	10.64	2.3	2	8.29	0.1	0.45	0.29	0.79	125	14
2021-09-29-08-40-57	2021	9	29	8	41	20.11	35.1581	25.2429	10.37	3.5	2	7.9	0.15	0.4	0.28	0.65	125	41
2021-09-29-08-47-15	2021	9	29	8	47	16.15	35.1946	25.3061	7.51	1.6	3	5.82	0.1	0.54	0.47	0.94	175	11
2021-09-29-09-40-57	2021	9	29	9	40	56.94	35.1623	25.2544	10.65	2.7	2	7.34	0.13	0.45	0.3	0.83	125	24
2021-09-29-10-37-10	2021	9	29	10	37	50.24	35.1457	25.2305	10.81	2.1	4	7.72	0.14	0.42	0.29	0.71	79	18
2021-09-29-10-41-59	2021	9	29	10	41	59.25	35.1848	25.2927	7.13	1.7	3	5.36	0.14	0.57	0.35	0.94	110	12
2021-09-29-10-42-33	2021	9	29	10	42	33.24	35.1465	25.2313	11.31	2	4	7.92	0.13	0.56	0.41	0.95	130	12
2021-09-29-11-23-50	2021	9	29	11	23	50.96	35.139	25.2301	10.21	2.3	4	9.51	0.11	0.31	0.23	0.97	133	18
2021-09-29-11-36-33	2021	9	29	11	36	33.9	35.1516	25.2305	8.82	2.8	4	8.14	0.14	0.48	0.3	0.88	121	19
2021-09-29-11-54-25	2021	9	29	11	54	25.65	35.1382	25.2019	12.13	2.4	4	9.09	0.11	0.52	0.36	1	85	21
2021-09-29-11-54-50	2021	9	29	11	54	50.25	35.136	25.2048	11.99	4.5	4	8.52	0.13	0.39	0.29	0.7	92	60
2021-09-29-12-09-48	2021	9	29	12	9	48.83	35.1383	25.204	12.29	2.3	4	5.65	0.15	0.55	0.36	0.7	96	21
2021-09-29-12-14-27	2021	9	29	12	14	27.94	35.197	25.2555	11.23	1.8	2	2.91	0.15	1.36	0.87	1.06	148	14
2021-09-29-12-36-26	2021	9	29	12	36	26.96	35.1342	25.2003	11.21	2.2	4	5.4	0.14	0.46	0.31	0.72	102	18
2021-09-29-12-40-02	2021	9	29	12	40	2.6	35.1306	25.278	5.05	3.4	4	11.42	0.09	0.3	0.21	0.43	132	39
2021-09-29-12-42-41	2021	9	29	12	42	41.54	35.1338	25.1958	8.84	3.4	4	5.49	0.12	0.36	0.26	0.73	136	23
2021-09-29-12-55-32	2021	9	29	12	55	33.01	35.1358	25.2134	12.64	3	4	12.47	0.08	0.33	0.25	1.08	138	33
2021-09-29-13-27-40	2021	9	29	13	28	10.73	35.1224	25.2604	6.62	2.4	4	6.76	0.1	0.44	0.24	1.27	141	21
2021-09-29-14-13-08	2021	9	29	14	13	25.35	35.1218	25.2624	6.85	2.4	4	6.37	0.18	0.44	0.32	0.38	134	13
2021-09-29-14-22-01	2021	9	29	14	22	34.17	35.1244	25.2605	6.79	2.3	4	11.37	0.05	0.47	0.34	0.75	134	11
2021-09-29-14-28-28	2021	9	29	14	29	7.68	35.1418	25.2342	10.72	1.7	4	7.98	0.11	0.65	0.3	0.46	129	11
2021-09-29-14-33-28	2021	9	29	14	33	29.1	35.1442	25.2086	14.19	2.1	4	6.98	0.14	0.44	0.3	0.92	133	17
2021-09-29-14-35-10	2021	9	29	14	35	10.48	35.1191	25.2643	5.47	1.7	4	10.65	0.14	0.52	0.36	1.29	134	12
2021-09-29-15-10-22	2021	9	29	15	10	22.58	35.1534	25.2384	12.19	2.6	4	8.48	0.06	0.4	0.24	0.73	127	30
2021-09-29-15-17-22	2021	9	29	15	17	23.3	35.1438	25.2296	9.13	2.6	4	7.27	0.08	0.45	0.29	0.69	132	24
2021-09-29-15-42-47	2021	9	29	15	42	47.21	35.1689	25.2612	8.14	1.4	2	8.13	0.11	0.53	0.36	1.62	127	11
2021-09-29-15-47-54	2021	9	29	15	47	55.13	35.1401	25.2033	12.65	2.2	4	6.6	0.12	0.41	0.31	0.82	133	19
2021-09-29-16-04-51	2021	9	29	16	4	51.47	35.1963	25.307	7.03	2.8	3	5.63	0.12	0.43	0.29	0.84	113	32
2021-09-29-16-44-16	2021	9	29	16	44	16.76	35.1321	25.2795	6.62	2.6	4	11.03	0.09	0.3	0.2	0.38	130	24
2021-09-29-16-50-33	2021	9	29	16	51	31.75	35.1906	25.3074	7.74	2.3	3	5.92	0.08	0.43	0.27	0.9	113	13
2021-09-29-16-53-05	2021	9	29	16	53	5.68	35.1884	25.3029	9.71	1.7	3	5.23	0.06	0.51	0.3	0.94	109	12
2021-09-29-16-57-22	2021	9	29	16	57	22.47	35.2001	25.3036	8.11	2.3	3	6.01	0.09	0.47	0.3	1.1	115	17
2021-09-29-17-00-50	2021	9	29	17	0	50.7	35.1264	25.2605	7.99	3.1	4	11.7	0.1	0.36	0.25	0.36	135	34
2021-09-29-17-17-14	2021	9	29	17	17	14.76	35.1859	25.3022	8.75	2.5	3	7.18	0.11	0.38	0.29	0.85	124	30
2021-09-29-18-13-06	2021	9	29	18	13	6.34	35.1186	25.2542	5.35	2.2	4	11.28	0.19	0.37	0.32	0.54	136	21
2021-09-29-19-26-24	2021	9	29	19	26	24.64	35.1366	25.2547	7.82	2.6	4	9.67	0.09	0.52	0.29	1.46	129	22
2021-09-29-19-52-22	2021	9	29	19	52	22.08	35.1393	25.2267	8.41	2.7	4	7.7	0.13	0.33	0.22	0.85	129	24
2021-09-29-20-19-33	2021	9	29	20	19	33.68	35.1371	25.2333	9.6	2.4	4	8.8	0.11	0.35	0.22	0.65	135	24
2021-09-29-20-36-26	2021	9	29	20	36	26.16	35.1466	25.2279	10.27	2	4	8.22	0.13	0.41	0.26	0.72	127	22
2021-09-29-20-38-12	2021	9	29	20	38	12.72	35.1337	25.228	8.55	3.1	4	8.21	0.1	0.28	0.19	0.58	132	44
2021-09-29-20-38-43	2021	9	29	20	38	43.16	35.1384	25.2316	10.14	2.8	4	8.85	0.13	0.43	0.27	0.97	128	16
2021-09-29-20-56-25	2021	9	29	20	56	25.2	35.1637	25.2477	10.03	2.5	2	7.37	0.19	0.36	0.25	0.81	122	30
2021-09-29-21-01-19	2021	9	29	21	1	19.08	35.1201	25.2628	7.81	3	4	5.9	0.1	0.35	0.19	0.91	136	37
2021-09-29-21-05-28	2021	9	29	21	5	28.84	35.169	25.2779	9.1	2.5	2	5.77	0.1	0.4	0.21	0.57	120	34
2021-09-29-21-22-36	2021	9	29	21	22	37.76	35.1858	25.3027	6.71	3.2	3	5.2	0.13	0.34	0.21	0.76	108	37
2021-09-29-21-49-47	2021	9	29	21	49	47.2	35.135	25.2291	9.88	3	4	8.86	0.09	0.32	0.21	0.63	134	38
2021-09-29-22-01-12	2021	9	29	22	1	12.24	35.1354	25.2292	9.41	2.7	4	9.23	0.11	0.34	0.21	0.85	132	35
2021-09-29-22-55-16	2021	9	29	22	55	15.76	35.1969	25.3093	7.08	1.7	3	6.05	0.16	0.38	0.24	0.75	117	15
2021-09-29-23-12-17	2021	9	29	23	13	2.76	35.1514	25.2222	10.43	2.1	4	7.83	0.11	0.52	0.35	1.03	133	11
2021-09-29-23-19-37	2021	9	29	23	19	37.96	35.1411	25.2017	13.16	2.7	4	5.91	0.12	0.37	0.26	0.64	132	36
2021-09-29-23-32-36	2021	9	29	23	32	36.32	35.1325	25.1954	11.16	2.7	4	5.1	0.14	0.33	0.24	0.65	132	35
2021-09-29-23-47-10	2021	9	29	23	47	54.72	35.1658	25.2451	12.44	1.5	2	7.83	0.07	0.76	0.51	1.26	163	11
2021-09-29-23-54-50	2021	9	29	23	54	50.72	35.1485	25.2305	10.43	2.3	4	8.27	0.08	0.58	0.35	1.03	132	28
2021-09-29-23-56-49	2021	9	29	23	56	50.02	35.1379	25.2271	9.6	2	4	8.52	0.12	0.45	0.28	0.82	134	17
2021-09-30-00-04-50	2021	9	30	0	5	14.04	35.1878	25.3066	6.25	2	3	5.95	0.11	0.47	0.31	0.4	117	11
2021-09-30-00-15-36	2021	9	30	0	15	36.87	35.1537	25.232	11.35	2.6	4	7.9	0.12	0.34	0.21	0.6	124	30
2021-09-30-00-41-54	2021	9	30	0	41	54.18	35.1366	25.2288	9.76	2.1	4	8.5	0.14	0.47	0.32	1.14	132	18
2021-09-30-00-59-02	2021	9	30	0	59	2.74	35.171	25.3227	6.64	2	3	3.49	0.15	0.43	0.24	0.94	110	17
2021-09-30-01-22-12	2021	9	30	1	22	12.18	35.1193	25.2475	8.04	1.3	4	7.25	0.19	0.68	0.46	1.96	140	11
2021-09-30-01-38-49	2021	9	30	1	38	49.18	35.1725	25.2463	11.03	2.6	2	5.98	0.15	0.37	0.24	0.65	117	31
2021-09-30-01-56-40	2021	9	30	1	56	41.02	35.1279	25.199	11.34	1.4	4	12.85	0.12	0.54	0.35	2.2	137	11
2021-09-30-02-03-14	2021	9	30	2	3	14.89	35.1351	25.2767	5.93	2.1	4	4.64	0.1	0.38	0.23	0.29	128	18
2021-09-30-02-14-13	2021	9	30	2	14	43.79	35.1508	25.234	10.99	1.9	4	8.02	0.12	0.49	0.38	0.98	125	13
2021-09-30-02-16-07	2021	9	30	2	16	7.58	35.1379	25.2297	9.67	2.5	4	8.36	0.11	0.42	0.3	0.74	130	20
2021-09-30-02-29-25	2021	9	30	2	29	25.45	35.1383	25.2325	9.34	2.7	4	8.66	0.11	0.36	0.22	0.7	132	25
2021-09-30-02-52-55	2021	9	30	2	52	55.89	35.138	25.228	9.18	2.3	4	8.65	0.1	0.38	0.26	0.79	135	18
2021-09-30-03-01-59	2021	9	30	3	1	59.79	35.1424	25.2238	9.97	3.1	4	9.58	0.09	0.32	0.21	0.85	129	27
2021-09-30-03-37-49	2021	9	30	3	37	49.03	35.1887	25.303	7.88	2.5	3	5.26	0.14	0.38	0.23	0.64	106	25
2021-09-30-03-43-39	2021	9	30	3	43	59.33	35.1368	25.2289	9.35	2.2	4	7.9	0.15	0.73	0.53	1.88	136	11
2021-09-30-03-54-00	2021	9	30	3	54	0.779999	35.1611	25.2354	9.94	1.9	2	7.39	0.11	0.53	0.43	1.16	127	11
2021-09-30-03-54-08	2021	9	30	3	54	8.23	35.1747	25.2361	7.9	2.3	2	6.02	0.1	0.76	0.4	0.72	170	13
2021-09-30-03-54-52	2021	9	30	3	54	52.34	35.1328	25.2484	8.07	2.1	4	7.04	0.13	0.47	0.33	1.21	130	12
2021-09-30-04-24-49	2021	9	30	4	24	49.11	35.1351	25.2301	8.9	2.9	4	8.26	0.14	0.4	0.25	0.92	129	31
2021-09-30-05-31-22	2021	9	30	5	31	22.24	35.1771	25.2362	9.12	2	2	5.51	0.12	0.5	0.36	0.76	124	11
2021-09-30-05-36-48	2021	9	30	5	36	48.33	35.1386	25.2015	12.52	2.6	4	6.27	0.08	0.34	0.25	0.64	133	20
2021-09-30-05-42-33	2021	9	30	5	42	33.37	35.1409	25.204	12.93	3.5	4	6.02	0.13	0.38	0.25	0.63	133	72
2021-09-30-05-42-51	2021	9	30	5	42	51.19	35.1444	25.201	13.18	3.6	4	6.59	0.14	0.66	0.36	0.97	140	14
2021-09-30-06-21-03	2021	9	30	6	21	2.75	35.1576	25.2379	10.85	2.5	2	7.65	0.09	0.43	0.29	0.82	124	23
2021-09-30-07-09-25	2021	9	30	7	9	25.92	35.1943	25.313	6.5	2.3	3	6.32	0.2	0.68	0.48	1.09	120	11
2021-09-30-07-33-07	2021	9	30	7	33	7.48	35.1731	25.2316	9.95	1.6	2	6.1	0.14	0.49	0.34	0.83	118	12
2021-09-30-08-08-05	2021	9	30	8	8	5.19	35.1429	25.2285	10.3	2.3	4	9.71	0.12	0.4	0.28	1.13	132	18
2021-09-30-08-11-35	2021	9	30	8	11	35.77	35.1384	25.231	8.76	2.1	4	8.34	0.11	0.43	0.25	1.15	133	15
2021-09-30-08-28-20	2021	9	30	8	28	20.04	35.1427	25.2234	9.23	2.9	4	8.98	0.12	0.38	0.23	0.87	128	28
2021-09-30-08-45-54	2021	9	30	8	46	34.5	35.1874	25.3067	6.09	2	3	5.3	0.08	0.49	0.29	1.11	107	11
2021-09-30-09-09-13	2021	9	30	9	9	12.25	35.1995	25.3058	7.78	2.9	3	6.11	0.11	0.4	0.23	0.78	110	27
2021-09-30-09-12-26	2021	9	30	9	12	26.85	35.1957	25.3054	7.38	2.1	3	5.62	0.11	0.39	0.23	0.65	114	19
2021-09-30-09-16-14	2021	9	30	9	16	15.1	35.1579	25.2316	10.41	2.2	2	7.72	0.11	0.49	0.31	0.96	123	19
2021-09-30-09-21-42	2021	9	30	9	21	42.65	35.1976	25.3051	7.23	1.8	3	5.67	0.12	0.46	0.28	0.76	112	13
2021-09-30-09-40-20	2021	9	30	9	40	47.77	35.1994	25.3077	7.38	1.8	3	6.22	0.06	0.85	0.49	1.72	183	11
2021-09-30-09-44-37	2021	9	30	9	44	37.17	35.1884	25.2989	8.18	2.6	3	5.59	0.12	0.45	0.26	0.9	110	26
2021-09-30-10-02-43	2021	9	30	10	3	54.25	35.1983	25.3073	6.83	1.7	3	6.02	0.08	0.5	0.28	1.26	113	11
2021-09-30-10-24-39	2021	9	30	10	24	38.59	35.1854	25.2853	8.74	2.4	2	5.46	0.14	0.4	0.26	0.95	119	26
2021-09-30-10-54-23	2021	9	30	10	54	23.29	35.1206	25.2625	5.38	2.2	4	6.42	0.14	0.45	0.3	0.36	134	20
2021-09-30-11-22-08	2021	9	30	11	22	47.7	35.1862	25.3356	5.1	1.2	3	3.77	0.06	0.93	0.72	0.48	187	11
2021-09-30-11-28-55	2021	9	30	11	29	29.33	35.1347	25.235	7.8	1.2	4	8.76	0.09	0.79	0.38	2.29	165	11
2021-09-30-11-42-50	2021	9	30	11	43	33.85	35.1232	25.2531	7.97	2.2	4	7.22	0.1	0.52	0.3	0.34	136	11
2021-09-30-11-46-08	2021	9	30	11	47	2.53	35.1937	25.3114	6.82	1.9	3	6.16	0.1	0.52	0.32	1.17	118	11
2021-09-30-12-20-28	2021	9	30	12	20	47.38	35.1497	25.2312	10.77	2	4	8.3	0.15	0.49	0.36	0.98	125	13
2021-09-30-12-41-37	2021	9	30	12	41	36.72	35.168	25.3855	6.53	1.6	3	6.25	0.33	2.4	0.98	1.98	165	13
2021-09-30-12-43-22	2021	9	30	12	43	30.25	35.1398	25.2287	9.05	3.5	4	8.57	0.12	0.52	0.24	0.79	172	33
2021-09-30-12-55-26	2021	9	30	12	55	27.17	35.1019	25.3439	8.04	2.1	4	3.43	0.34	1.08	1.09	1.87	163	11
2021-09-30-12-57-35	2021	9	30	12	58	45.46	35.1429	25.2591	8.73	2.3	4	6.39	0.1	0.49	0.32	1.38	131	11
2021-09-30-13-35-56	2021	9	30	13	35	56.78	35.128	25.2518	8.51	2.8	4	7.4	0.13	0.33	0.25	0.44	134	29
2021-09-30-13-45-08	2021	9	30	13	45	45.74	35.1902	25.3075	7.33	2.4	3	5.69	0.06	0.53	0.33	1.11	110	11
2021-09-30-14-09-31	2021	9	30	14	9	31.46	35.1243	25.2434	7.63	1.7	4	7.92	0.14	0.55	0.37	1.11	138	14
2021-09-30-14-26-42	2021	9	30	14	26	42.45	35.1316	25.2732	5.32	2.7	4	5.07	0.14	0.39	0.27	0.29	131	26
2021-09-30-14-31-32	2021	9	30	14	31	32.48	35.1469	25.2209	9.84	2.5	4	7.22	0.08	0.42	0.25	0.74	131	21
2021-09-30-14-40-14	2021	9	30	14	40	14.99	35.1211	25.2674	6.35	3.5	4	6.38	0.09	0.38	0.23	0.28	135	31
2021-09-30-14-47-01	2021	9	30	14	47	38.38	35.1913	25.3054	7.66	1.7	3	5.37	0.08	0.49	0.33	1.04	111	12
2021-09-30-15-26-02	2021	9	30	15	26	2.46	35.137	25.2277	8.91	1.9	4	8.35	0.15	0.62	0.43	1.37	130	11
2021-09-30-15-49-41	2021	9	30	15	49	41.24	35.1262	25.2444	8.16	2	4	10.16	0.08	0.58	0.36	0.66	138	11
2021-09-30-15-54-42	2021	9	30	15	54	43.07	35.1361	25.2273	9.19	2.4	4	9.01	0.06	0.47	0.32	1.29	133	11
2021-09-30-16-19-07	2021	9	30	16	19	55.96	35.1897	25.3105	6.54	1.7	3	5.73	0.08	0.46	0.29	0.4	114	11
2021-09-30-16-26-59	2021	9	30	16	26	58.88	35.1368	25.2315	9.93	2.3	4	9.61	0.08	0.46	0.32	1.3	135	21
2021-09-30-17-10-36	2021	9	30	17	10	35.6	35.1411	25.2433	9.35	2.4	4	7.95	0.1	0.4	0.27	1.11	129	19
2021-09-30-17-13-04	2021	9	30	17	13	4.72	35.1305	25.2782	5.91	3.4	4	4.86	0.09	0.37	0.23	0.29	131	23
2021-09-30-17-28-15	2021	9	30	17	28	15.6	35.1899	25.3057	7.8	2.5	3	6.7	0.09	0.54	0.38	1.89	114	11
2021-09-30-18-25-22	2021	9	30	18	25	22.84	35.1162	25.245	7.52	1.5	4	7.42	0.12	0.6	0.64	2.11	140	13
2021-09-30-18-27-38	2021	9	30	18	27	38.78	35.1367	25.2507	7.71	2	4	6.96	0.07	0.71	0.37	2	137	11
2021-09-30-19-26-22	2021	9	30	19	26	21.96	35.1571	25.2137	10.83	2	4	7.12	0.13	0.66	0.34	0.55	142	16
2021-09-30-19-43-06	2021	9	30	19	43	6.32	35.1302	25.2593	8.15	1.6	4	6.16	0.06	0.51	0.34	1.06	133	12
2021-09-30-19-52-10	2021	9	30	19	52	47.96	35.1505	25.2354	11.57	2.6	4	8.75	0.13	0.37	0.23	0.63	128	29
2021-09-30-19-53-01	2021	9	30	19	53	1.24	35.1441	25.2569	8.78	2.6	4	6.21	0.21	0.45	0.24	0.84	126	24
2021-09-30-20-13-29	2021	9	30	20	14	13.7	35.1147	25.2628	7.16	2.7	4	5.19	0.12	0.37	0.25	0.72	93	32
2021-09-30-20-25-06	2021	9	30	20	25	6.68	35.1372	25.228	8.89	2.4	4	7.04	0.12	0.33	0.23	0.58	80	32
2021-09-30-21-00-05	2021	9	30	21	0	5.44	35.1367	25.2064	12.75	1.6	4	10.96	0.18	0.41	0.29	1.24	131	23
2021-09-30-21-01-02	2021	9	30	21	1	1.78	35.1956	25.3115	7.25	1.3	3	6.03	0.17	0.51	0.3	1.08	114	15
2021-09-30-21-01-52	2021	9	30	21	1	52.72	35.1371	25.226	8.92	2	4	8.74	0.13	0.4	0.24	0.87	131	23
2021-09-30-21-06-07	2021	9	30	21	6	58.52	35.142	25.2031	12.49	2.5	4	11.23	0.12	0.47	0.32	1.27	134	16
2021-09-30-21-07-35	2021	9	30	21	7	35.2	35.183	25.2792	8.7	1.8	3	5.36	0.15	0.46	0.25	0.82	109	16
2021-09-30-21-09-12	2021	9	30	21	9	12.44	35.1346	25.2567	9.14	2.3	4	6.54	0.13	0.4	0.24	0.85	129	23
2021-09-30-21-15-02	2021	9	30	21	15	2.16	35.1423	25.1929	11.99	1.4	4	4.6	0.12	0.43	0.31	0.79	131	18
2021-09-30-21-19-56	2021	9	30	21	19	56.22	35.1524	25.2341	10.79	2.3	4	8.43	0.12	0.39	0.27	0.86	125	32
2021-09-30-21-20-23	2021	9	30	21	20	22.56	35.1827	25.2955	8.22	2.6	3	5.7	0.16	0.4	0.24	0.7	112	29
2021-09-30-21-57-14	2021	9	30	21	58	42.04	35.1754	25.2561	11.47	2.2	2	6.28	0.1	0.38	0.23	0.75	118	27
2021-09-30-22-13-02	2021	9	30	22	13	3.06	35.1564	25.2188	10.58	2.2	4	6.94	0.09	0.41	0.25	0.74	132	33
2021-09-30-22-14-41	2021	9	30	22	14	41.96	35.1413	25.2293	10.05	2.1	4	8.32	0.11	0.39	0.25	0.77	127	23
2021-09-30-22-21-59	2021	9	30	22	21	59.62	35.1644	25.2576	9.54	2.1	2	6.84	0.11	0.42	0.23	0.65	120	25
2021-09-30-22-25-46	2021	9	30	22	25	45.98	35.1783	25.2531	11.78	1.8	2	6.04	0.15	0.42	0.25	0.74	118	25
2021-09-30-22-56-42	2021	9	30	22	56	42.44	35.1946	25.3245	6.74	1.3	3	4.62	0.12	0.45	0.29	0.91	106	15
2021-09-30-23-04-27	2021	9	30	23	4	26.52	35.1423	25.2593	8.13	3	4	6.38	0.09	0.34	0.22	0.75	129	35
2021-09-30-23-06-05	2021	9	30	23	6	5.88	35.137	25.2272	9.32	2.5	4	8.7	0.12	0.34	0.23	0.59	134	30
2021-09-30-23-52-31	2021	9	30	23	52	36.52	35.1902	25.3101	6	1.6	3	5.31	0.09	0.47	0.29	1.06	110	11
2021-10-01-00-02-38	2021	10	1	0	2	38.3	35.1389	25.2319	10.02	2	4	8.69	0.12	0.36	0.23	0.83	135	19
2021-10-01-00-03-03	2021	10	1	0	3	3.38	35.1364	25.2303	9.22	2.5	4	8.21	0.11	0.38	0.23	0.72	130	32
2021-10-01-00-04-00	2021	10	1	0	4	0.5	35.1362	25.232	9.76	2.1	4	7.73	0.15	0.39	0.27	1.16	131	20
2021-10-01-00-14-33	2021	10	1	0	14	33.87	35.1418	25.2027	13	1.6	4	6.04	0.14	0.46	0.32	0.77	131	18
2021-10-01-00-15-10	2021	10	1	0	15	10.33	35.134	25.2294	9.08	2.2	4	8.6	0.12	0.4	0.26	0.74	129	25
2021-10-01-00-16-09	2021	10	1	0	16	9.11	35.1602	25.2615	8.73	2	2	6.85	0.12	0.37	0.25	0.75	121	18
2021-10-01-00-19-06	2021	10	1	0	19	6.03	35.1311	25.237	8.5	2.2	4	9.35	0.08	0.62	0.33	0.56	134	11
2021-10-01-00-32-05	2021	10	1	0	32	5.22	35.1375	25.229	9.82	2.2	4	9.76	0.12	0.37	0.24	1.46	132	26
2021-10-01-00-51-20	2021	10	1	0	51	19.73	35.1539	25.2255	10.51	2.3	2	7.09	0.14	0.37	0.24	0.67	122	30
2021-10-01-01-04-12	2021	10	1	1	4	12.46	35.1365	25.2303	8.2	2.3	4	8.41	0.09	0.33	0.2	1.02	132	31
2021-10-01-01-34-08	2021	10	1	1	34	7.82	35.1505	25.233	11.02	2.7	4	8.2	0.15	0.4	0.26	0.72	70	37
2021-10-01-01-42-56	2021	10	1	1	43	21.37	35.1384	25.257	8.78	1.7	4	6.71	0.13	0.54	0.36	1.31	129	11
2021-10-01-01-51-08	2021	10	1	1	51	37.72	35.1474	25.2325	9.85	1.9	4	8.71	0.08	0.72	0.37	1.11	150	11
2021-10-01-02-16-53	2021	10	1	2	16	52.91	35.1399	25.2025	12.54	3	4	5.83	0.11	0.38	0.27	0.72	134	39
2021-10-01-02-42-06	2021	10	1	2	42	38.87	35.139	25.2027	12.74	1.6	4	5.76	0.13	0.56	0.41	1.14	134	11
2021-10-01-03-13-44	2021	10	1	3	13	43.85	35.1347	25.2288	9.31	2.3	4	8.84	0.1	0.33	0.22	0.54	134	29
2021-10-01-03-15-15	2021	10	1	3	15	15.84	35.1427	25.2585	8.55	2.1	4	7.19	0.12	0.44	0.26	0.58	130	22
2021-10-01-03-15-42	2021	10	1	3	15	42.07	35.1169	25.2533	7.34	1.8	4	7.62	0.09	0.34	0.21	0.28	140	19
2021-10-01-03-31-26	2021	10	1	3	31	25.78	35.1329	25.226	9.2	1.9	4	10.07	0.04	0.46	0.33	1.74	136	11
2021-10-01-03-38-44	2021	10	1	3	38	44.68	35.1249	25.2668	8.27	2.8	4	6.67	0.12	0.39	0.24	1.23	137	37
2021-10-01-03-43-21	2021	10	1	3	43	21.5	35.122	25.2665	8.21	1.9	4	6.18	0.12	0.47	0.29	1.32	136	12
2021-10-01-03-52-20	2021	10	1	3	52	20.32	35.1403	25.2048	12.86	1.6	4	5.33	0.13	0.54	0.37	0.97	132	11
2021-10-01-05-49-40	2021	10	1	5	49	42.42	35.1394	25.2265	9.27	2.2	4	8.44	0.1	0.48	0.32	1.15	132	11
2021-10-01-06-12-45	2021	10	1	6	12	45.71	35.1572	25.2171	11.22	1.6	4	7.36	0.12	0.71	0.42	1.36	160	11
2021-10-01-06-13-11	2021	10	1	6	13	11.52	35.1296	25.2505	9.3	1.3	4	7.61	0.11	0.84	0.47	1.81	172	11
2021-10-01-07-25-41	2021	10	1	7	25	45.31	35.1943	25.3041	7	2.5	3	5.94	0.06	0.8	0.62	0.75	186	11
2021-10-01-07-36-39	2021	10	1	7	36	39.28	35.1215	25.2563	7.57	1.6	4	7.12	0.12	0.81	0.45	1.87	176	11
2021-10-01-07-37-09	2021	10	1	7	37	9.48	35.1725	25.2786	7.91	1.6	2	5.93	0.07	0.65	0.4	1.5	141	11
2021-10-01-07-46-00	2021	10	1	7	46	0.209999	35.1415	25.2321	10	2.2	4	7.1	0.12	0.39	0.26	0.99	129	16
2021-10-01-07-54-25	2021	10	1	7	55	4.51	35.1358	25.2243	9.09	2.1	4	9.63	0.11	0.47	0.32	1.33	132	13
2021-10-01-08-19-04	2021	10	1	8	19	3.01	35.1452	25.2287	10.3	2.5	4	8.83	0.17	0.44	0.33	0.9	128	16
2021-10-01-08-34-44	2021	10	1	8	35	31.94	35.1861	25.2963	7.3	1.9	3	5.82	0.04	0.54	0.34	1.08	110	11
2021-10-01-09-21-05	2021	10	1	9	21	6.95	35.1914	25.3136	6.28	1.9	3	5.77	0.12	0.53	0.33	0.44	116	11
2021-10-01-09-23-02	2021	10	1	9	23	2.86	35.1387	25.2558	8.16	2.8	4	7.34	0.07	0.37	0.22	0.31	131	22
2021-10-01-10-23-40	2021	10	1	10	23	39.51	35.1961	25.3056	7.23	2.9	3	6.25	0.13	0.4	0.24	1.03	116	23
2021-10-01-10-25-33	2021	10	1	10	25	32.3	35.1459	25.2288	10.1	2.6	4	9.02	0.12	0.41	0.26	0.95	128	18
2021-10-01-10-45-41	2021	10	1	10	46	20.91	35.1921	25.3033	7.37	2	3	5.09	0.06	0.68	0.6	1.16	169	11
2021-10-01-11-04-01	2021	10	1	11	4	6.62	35.1524	25.2133	9.86	3.2	4	6.7	0.13	0.4	0.29	0.84	127	23
2021-10-01-11-15-47	2021	10	1	11	15	46.38	35.1425	25.2268	9.76	3	4	7.82	0.11	0.38	0.25	0.85	131	27
2021-10-01-11-21-23	2021	10	1	11	21	22.32	35.1984	25.3173	7.64	2.8	3	6.25	0.17	0.43	0.25	0.35	117	23
2021-10-01-12-03-26	2021	10	1	12	3	26.07	35.1907	25.2996	7.27	2.8	3	5.27	0.11	0.41	0.24	0.8	111	22
2021-10-01-12-07-48	2021	10	1	12	8	10.63	35.1907	25.3081	5.27	2.5	3	4.05	0.11	0.35	0.76	0.83	190	11
2021-10-01-12-31-51	2021	10	1	12	31	51.19	35.1842	25.3283	5.14	2.6	3	4.35	0.12	0.28	0.21	0.26	114	18
2021-10-01-12-44-44	2021	10	1	12	44	44.43	35.1183	25.246	9.67	1.8	4	8.54	0.12	0.57	0.37	1.03	147	15
2021-10-01-12-49-32	2021	10	1	12	50	29.68	35.1953	25.3028	6.92	2	3	6.53	0.11	0.62	0.56	1.09	189	11
2021-10-01-12-58-04	2021	10	1	12	58	4.09	35.1473	25.2288	10.51	2.9	4	9.37	0.13	0.35	0.24	0.94	129	20
2021-10-01-13-06-10	2021	10	1	13	7	11.57	35.1956	25.3022	7.39	1.8	3	7.03	0.08	0.52	0.33	1.17	129	11
2021-10-01-13-10-51	2021	10	1	13	12	15.75	35.195	25.3059	7.56	2.3	3	5.25	0.15	0.49	0.31	0.96	117	14
2021-10-01-13-51-14	2021	10	1	13	51	36.59	35.1394	25.2248	9.33	1.7	4	7.7	0.07	0.48	0.31	1.46	131	11
2021-10-01-14-11-13	2021	10	1	14	11	13.55	35.1256	25.2432	8.01	2.6	4	7.6	0.09	0.35	0.23	1.03	135	20
2021-10-01-14-46-27	2021	10	1	14	46	27.16	35.1476	25.2303	10.91	2.8	4	8.77	0.09	0.38	0.27	0.72	127	26
2021-10-01-15-10-04	2021	10	1	15	10	3.87	35.1966	25.3091	6.95	1.9	3	6.67	0.13	0.48	0.3	0.76	121	15
2021-10-01-15-16-23	2021	10	1	15	17	9.47	35.143	25.2084	9.63	1.8	4	5.64	0.12	0.58	0.37	0.92	136	11
2021-10-01-15-24-17	2021	10	1	15	24	17.35	35.16	25.2474	10.36	1.7	2	7.72	0.11	0.48	0.28	0.6	130	15
2021-10-01-15-26-44	2021	10	1	15	27	15.98	35.1488	25.2297	11.09	2.4	4	8.83	0.12	0.41	0.28	0.97	127	25
2021-10-01-15-34-47	2021	10	1	15	34	47.59	35.1358	25.2658	5.87	3.9	4	5.78	0.1	0.27	0.18	0.22	130	78
2021-10-01-15-40-40	2021	10	1	15	40	39.31	35.1352	25.2656	5.76	2.7	4	5.75	0.11	0.38	0.24	0.46	130	21
2021-10-01-15-58-56	2021	10	1	15	59	24.53	35.1954	25.3067	7.58	2.1	3	6.87	0.03	0.64	0.41	2.1	172	11
2021-10-01-16-04-40	2021	10	1	16	4	43.28	35.1347	25.2681	5.92	2.1	4	5.89	0.1	0.51	0.36	0.38	131	11
2021-10-01-16-19-36	2021	10	1	16	19	53.07	35.1848	25.3007	8.62	2.2	3	5.28	0.06	0.55	0.36	1	111	11
2021-10-01-16-31-27	2021	10	1	16	31	27.74	35.1527	25.2364	11.76	2.3	2	7.08	0.14	0.5	0.34	0.83	122	17
2021-10-01-16-43-44	2021	10	1	16	43	45	35.1319	25.2362	7.98	2.7	4	8.41	0.12	0.45	0.25	1.16	134	30
2021-10-01-16-54-25	2021	10	1	16	54	25.45	35.131	25.2654	5.76	2.8	4	5.7	0.12	0.32	0.23	0.35	131	19
2021-10-01-17-08-00	2021	10	1	17	8	0	35.1305	25.2666	8.14	2.5	4	6	0.23	0.46	0.28	1.31	136	17
2021-10-01-17-19-46	2021	10	1	17	20	48.28	35.131	25.1956	9.76	1.7	4	5.48	0.07	0.52	0.34	0.93	137	11
2021-10-01-17-37-00	2021	10	1	17	37	0.720001	35.196	25.3053	7.39	2.3	3	6.25	0.14	0.67	0.44	1.8	170	12
2021-10-01-17-44-40	2021	10	1	17	44	40.48	35.1462	25.2316	10.55	2.2	4	8.85	0.12	0.37	0.26	0.78	128	19
2021-10-01-18-12-54	2021	10	1	18	12	54.38	35.142	25.2256	8.94	1.8	4	7.24	0.2	0.54	0.4	1.37	132	12
2021-10-01-18-13-17	2021	10	1	18	13	17.78	35.1557	25.2327	11.46	1.7	2	7.47	0.16	0.78	0.45	1.08	137	11
2021-10-01-18-19-41	2021	10	1	18	19	41.72	35.1574	25.2325	9.98	2	2	8.52	0.07	0.57	0.32	0.92	126	11
2021-10-01-18-48-40	2021	10	1	18	48	58.8	35.1886	25.2867	8.88	1.8	3	5.24	0.09	0.51	0.34	1.07	104	11
2021-10-01-18-51-42	2021	10	1	18	51	41.72	35.1772	25.2941	8.15	2.4	2	4.99	0.12	0.36	0.22	0.78	91	19
2021-10-01-20-27-44	2021	10	1	20	27	44.84	35.1221	25.2576	7.49	2.2	4	6.45	0.1	0.37	0.24	1.09	134	22
2021-10-01-20-29-38	2021	10	1	20	29	39.2	35.1369	25.2014	12.32	1.9	4	11.53	0.13	0.41	0.29	1.21	133	14
2021-10-01-20-42-31	2021	10	1	20	43	0.239998	35.1359	25.2058	13.22	1.7	4	11.86	0.07	0.75	0.38	1.65	154	11
2021-10-01-22-11-48	2021	10	1	22	11	47.92	35.1976	25.3062	7.75	1.6	3	5.75	0.09	0.42	0.26	0.79	117	13
2021-10-01-22-12-08	2021	10	1	22	12	8.64	35.136	25.2482	8.6	1.3	4	7.48	0.15	0.6	0.39	2.05	132	11
2021-10-01-22-14-18	2021	10	1	22	14	18.26	35.2051	25.3038	7.4	1.4	3	4.98	0.08	0.42	0.34	0.8	120	13
2021-10-01-22-23-02	2021	10	1	22	23	3.14	35.1357	25.2326	8.9	2.8	4	8.55	0.12	0.32	0.18	0.73	128	46
2021-10-01-22-29-01	2021	10	1	22	29	1.52	35.152	25.2168	10.6	2.2	4	7.02	0.09	0.41	0.27	0.75	129	24
2021-10-01-22-41-28	2021	10	1	22	41	28.6	35.127	25.256	8.38	1.9	4	7.25	0.09	0.41	0.27	0.3	137	12
2021-10-01-23-20-56	2021	10	1	23	20	56.78	35.1934	25.3153	6.28	2.7	3	5.67	0.11	0.35	0.21	0.68	115	53
2021-10-01-23-22-23	2021	10	1	23	22	23.44	35.1295	25.2676	5.77	2.9	4	6.18	0.1	0.31	0.17	0.24	131	38
2021-10-01-23-38-49	2021	10	1	23	39	19.72	35.1926	25.3145	6.35	1.7	3	6.06	0.09	0.38	0.24	0.32	117	16
2021-10-01-23-53-25	2021	10	1	23	53	25	35.1925	25.3151	5.94	2.1	3	5.77	0.1	0.3	0.18	0.74	115	33
2021-10-02-00-00-09	2021	10	2	0	0	9.68	35.1663	25.2383	11.68	1.6	2	6.62	0.1	0.37	0.26	0.6	120	18
2021-10-02-00-01-02	2021	10	2	0	1	2.44	35.1909	25.3101	6.82	1.3	3	5.81	0.11	0.47	0.29	0.82	115	16
2021-10-02-00-14-45	2021	10	2	0	14	45.57	35.1501	25.2309	11.17	2.6	4	8.51	0.12	0.37	0.24	0.6	126	55
2021-10-02-00-37-34	2021	10	2	0	37	34.72	35.197	25.3049	8	1.8	3	5.85	0.11	0.36	0.22	0.62	113	18
2021-10-02-01-08-39	2021	10	2	1	8	39.85	35.196	25.3059	7.57	2.3	3	5.52	0.12	0.35	0.22	0.8	113	30
2021-10-02-01-14-09	2021	10	2	1	14	9.58	35.1964	25.3046	7.81	2.1	3	5.66	0.12	0.36	0.25	0.65	112	30
2021-10-02-01-45-22	2021	10	2	1	45	22.08	35.1347	25.269	5.98	2.5	4	5.86	0.1	0.34	0.2	0.26	130	30
2021-10-02-01-52-48	2021	10	2	1	52	48.92	35.1229	25.2573	7.94	2.4	4	6.81	0.13	0.35	0.2	0.83	136	28
2021-10-02-01-53-50	2021	10	2	1	53	50.86	35.1282	25.2597	8.82	1.7	4	6.19	0.12	0.36	0.3	0.94	132	17
2021-10-02-02-34-49	2021	10	2	2	34	49.58	35.1975	25.3057	7.3	1.9	3	5.74	0.08	0.34	0.21	0.62	112	23
2021-10-02-03-01-35	2021	10	2	3	1	35.75	35.1998	25.3149	6.92	2.6	3	6	0.08	0.3	0.18	0.61	114	32
2021-10-02-03-05-52	2021	10	2	3	5	52.41	35.1325	25.2315	10.17	1.5	4	7.59	0.07	0.38	0.25	1.52	128	14
2021-10-02-03-07-23	2021	10	2	3	7	23.1	35.1235	25.253	7.86	1.5	4	6.87	0.1	0.51	0.3	1.29	135	12
2021-10-02-03-19-19	2021	10	2	3	19	55.72	35.1257	25.2564	7.89	2.1	4	6.8	0.08	0.54	0.34	0.67	135	11
2021-10-02-03-39-28	2021	10	2	3	39	28.7	35.1261	25.2749	5.67	2	4	5.22	0.15	0.53	0.34	0.35	133	12
2021-10-02-03-40-15	2021	10	2	3	40	15.24	35.1262	25.2429	8.38	1.7	4	8.21	0.09	0.57	0.34	2.02	144	11
2021-10-02-04-30-40	2021	10	2	4	30	40.87	35.174	25.2966	7.57	2.1	3	4.83	0.12	0.46	0.32	0.66	117	14
2021-10-02-06-22-47	2021	10	2	6	22	47.6	35.1748	25.2977	7.39	2.2	3	3.84	0.11	0.42	0.28	0.59	117	14
2021-10-02-06-43-00	2021	10	2	6	43	26.98	35.1337	25.2266	10.39	2	4	8.08	0.08	0.49	0.42	1.32	136	11
2021-10-02-07-38-03	2021	10	2	7	38	4.01	35.1788	25.3003	7.29	1.7	3	4.37	0.12	0.56	0.4	1.01	110	11
2021-10-02-07-51-08	2021	10	2	7	51	8.68	35.1794	25.3294	6.64	1.4	3	3.82	0.11	0.46	0.34	0.94	112	11
2021-10-02-07-59-20	2021	10	2	7	59	40.27	35.1967	25.3073	7.81	2.4	3	7.06	0.12	0.68	0.66	1.52	191	11
2021-10-02-08-03-35	2021	10	2	8	3	34.49	35.196	25.3041	7.48	2.5	3	6.53	0.13	0.45	0.29	1.05	121	19
2021-10-02-08-29-38	2021	10	2	8	29	38.37	35.1392	25.263	7.48	3.1	4	5.62	0.11	0.39	0.25	0.91	128	30
2021-10-02-08-38-58	2021	10	2	8	38	58.57	35.1904	25.3037	7.85	3.5	3	5.47	0.09	0.39	0.22	0.82	111	55
2021-10-02-08-52-30	2021	10	2	8	52	30.83	35.1237	25.231	10.68	2.1	4	9.14	0.15	0.57	0.35	1.12	140	14
2021-10-02-08-52-31	2021	10	2	8	52	30.83	35.1237	25.231	10.68	2.1	4	9.14	0.15	0.57	0.35	1.12	140	14
2021-10-02-09-43-51	2021	10	2	9	43	51.63	35.1353	25.2492	8.11	2.2	4	6.58	0.14	0.43	0.34	0.63	72	12
2021-10-02-10-22-59	2021	10	2	10	22	59.08	35.1763	25.2951	8.21	2.6	3	4.28	0.15	0.38	0.25	0.76	100	24
2021-10-02-10-31-35	2021	10	2	10	31	35.27	35.124	25.2585	7.84	2.5	4	5.18	0.12	0.37	0.31	0.86	76	17
2021-10-02-10-44-36	2021	10	2	10	44	36.38	35.0688	25.2556	11.71	2.6	4	2.31	0.16	0.45	0.29	0.57	164	22
2021-10-02-11-33-34	2021	10	2	11	34	24.69	35.1956	25.3203	5.78	2	3	7.31	0.03	0.96	0.59	2.46	162	11
2021-10-02-12-14-01	2021	10	2	12	14	1.28	35.1284	25.2515	8.08	1.5	4	5.22	0.14	0.62	0.49	0.82	76	11
2021-10-02-12-33-16	2021	10	2	12	33	16.13	35.1334	25.2493	8.58	3.1	4	5.95	0.21	0.26	0.19	0.3	70	28
2021-10-02-13-24-12	2021	10	2	13	24	12.26	35.1304	25.2451	7.98	3	4	6.97	0.41	0.49	0.4	1.83	74	20
2021-10-02-14-12-44	2021	10	2	14	12	43.77	35.1724	25.3351	5.79	1.6	3	0.57	0.45	1.16	0.86	1.75	99	11
2021-10-02-14-14-16	2021	10	2	14	14	15.92	35.1309	25.2611	6.1	2.2	4	6.55	0.18	0.33	0.34	0.39	73	16
2021-10-02-14-42-07	2021	10	2	14	42	8.46	35.1984	25.3139	7.5	2.7	3	5.73	0.27	0.42	0.34	1.21	117	23
2021-10-02-14-46-09	2021	10	2	14	46	9.48	35.2074	25.3052	7.95	3	3	4.71	0.24	0.34	0.36	0.93	115	21
2021-10-02-15-07-10	2021	10	2	15	7	11.61	35.1562	25.2677	6.27	2.3	2	6.01	0.35	0.59	0.43	1.69	79	16
2021-10-02-15-18-49	2021	10	2	15	18	49.65	35.122	25.2434	7.39	2.1	4	5.65	0.19	0.53	0.37	1.32	77	11
2021-10-02-15-40-13	2021	10	2	15	40	13.91	35.1848	25.2983	7.81	1.4	3	6	0.11	0.6	0.46	1.2	115	11
2021-10-02-16-05-28	2021	10	2	16	5	29.11	35.1182	25.3577	13.97	2.7	4	2.84	0.17	0.44	0.29	0.59	112	19
2021-10-02-16-15-07	2021	10	2	16	16	1.53	35.1747	25.2406	8.18	2	2	6.09	0.12	0.44	0.49	1.47	101	11
2021-10-02-16-24-27	2021	10	2	16	24	27.77	35.1379	25.2297	10.6	2.6	4	7.48	0.2	0.42	0.31	0.93	81	19
2021-10-02-17-22-21	2021	10	2	17	22	21.4	35.2029	25.2998	8.12	2.7	3	4.95	0.13	0.35	0.24	1.01	123	32
2021-10-02-17-42-20	2021	10	2	17	42	20.52	35.1991	25.3056	8.36	1.9	3	5.44	0.09	0.29	0.39	0.87	135	14
2021-10-02-18-20-17	2021	10	2	18	20	17.12	35.1374	25.228	10.07	2.1	4	7.34	0.18	0.38	0.3	0.73	86	17
2021-10-02-18-30-14	2021	10	2	18	30	14.76	35.1486	25.2258	8.83	2.6	4	8.33	0.13	0.4	0.28	0.98	74	22
2021-10-02-18-31-08	2021	10	2	18	31	8.9	35.1371	25.23	9.11	3.7	4	7.02	0.15	0.34	0.24	0.6	79	52
2021-10-02-18-36-27	2021	10	2	18	36	26.92	35.201	25.2943	7.17	3	3	4.29	0.11	0.37	0.25	0.65	118	29
2021-10-02-19-05-40	2021	10	2	19	6	13.04	35.1333	25.2564	16.21	1.8	4	22	0.07	1.22	0.48	4.95	187	11
2021-10-02-19-23-26	2021	10	2	19	23	26.52	35.1365	25.2231	9.8	1.3	4	7.28	0.18	0.5	0.37	0.92	90	11
2021-10-02-19-23-43	2021	10	2	19	23	43.48	35.1971	25.3089	7.74	1.5	3	6.86	0.07	0.4	0.28	0.84	122	12
2021-10-02-19-25-10	2021	10	2	19	26	0.0599976	35.1591	25.2534	11.45	2.1	2	7.26	0.11	0.38	0.27	0.8	73	15
2021-10-02-19-39-37	2021	10	2	19	39	37.76	35.1985	25.3062	7.56	2	3	6.17	0.15	0.54	0.34	0.47	116	11
2021-10-02-19-58-36	2021	10	2	19	58	37.62	35.1519	25.2293	11.08	1.7	4	8.38	0.11	0.58	0.41	1.25	87	11
2021-10-02-20-02-40	2021	10	2	20	2	41.06	35.152	25.2345	11.59	1.2	4	7.2	0.13	0.7	0.5	1.07	88	11
2021-10-02-20-22-51	2021	10	2	20	22	51.16	35.1429	25.2237	8.36	2.2	4	7.87	0.11	0.39	0.27	0.92	79	20
2021-10-02-20-27-45	2021	10	2	20	28	25	35.1529	25.2151	9.57	2	4	8.13	0.08	0.43	0.29	0.76	75	16
2021-10-02-20-38-05	2021	10	2	20	38	5.94	35.1269	25.2102	10.59	1.2	4	6.65	0.1	0.52	0.36	0.88	138	12
2021-10-02-20-39-27	2021	10	2	20	39	27.32	35.141	25.2272	8.47	1.4	4	7.59	0.16	0.63	0.44	1.04	81	12
2021-10-02-20-42-29	2021	10	2	20	42	28.98	35.1533	25.2378	10.13	2	4	8.2	0.08	0.57	0.35	0.87	133	11
2021-10-02-20-52-25	2021	10	2	20	52	25.92	35.2631	25.2922	11.12	1.5	3	5.11	0.08	1.85	0.61	0.88	256	11
2021-10-02-21-09-03	2021	10	2	21	9	3.24	35.173	25.324	8.91	1.2	3	4.67	0.06	0.94	0.98	1.06	185	11
2021-10-02-21-14-51	2021	10	2	21	14	51.24	35.1384	25.2586	10.97	1.8	4	6.17	0.12	0.59	0.39	1.04	88	11
2021-10-02-21-21-52	2021	10	2	21	22	9.12	35.1921	25.3066	7.49	2	3	5.99	0.1	0.46	0.31	0.83	114	12
2021-10-02-21-46-12	2021	10	2	21	46	13.16	35.159	25.2539	11.52	2.3	2	7.4	0.14	0.41	0.29	0.7	72	27
2021-10-02-21-49-24	2021	10	2	21	49	24.08	35.156	25.2191	10.11	2.5	4	7.45	0.11	0.42	0.3	0.82	81	27
2021-10-02-22-09-48	2021	10	2	22	9	47.8	35.1608	25.2352	10.02	3	2	7.9	0.1	0.37	0.26	0.69	71	36
2021-10-02-22-30-55	2021	10	2	22	30	55.44	35.1534	25.2399	12.04	1.4	2	6.82	0.13	0.58	0.42	0.74	72	13
2021-10-02-22-33-53	2021	10	2	22	33	53.72	35.1415	25.2008	11.08	1.7	4	5.99	0.09	0.63	0.37	0.95	90	15
2021-10-02-22-35-29	2021	10	2	22	35	29.72	35.1317	25.2308	9.53	1.7	4	6.88	0.1	0.44	0.34	0.89	91	13
2021-10-02-22-57-47	2021	10	2	22	57	46.86	35.1964	25.303	7.53	3.3	3	5.34	0.13	0.41	0.25	0.85	113	45
2021-10-02-23-27-52	2021	10	2	23	27	51.48	35.1949	25.3078	6.21	3	3	6.1	0.14	0.34	0.23	0.28	117	37
2021-10-02-23-46-20	2021	10	2	23	46	20.44	35.1998	25.3059	7.06	2.4	3	5.15	0.15	0.43	0.29	0.98	120	25
2021-10-03-00-05-40	2021	10	3	0	5	40.81	35.1831	25.2924	9.7	1.9	3	6.06	0.11	0.51	0.35	0.69	111	17
2021-10-03-00-09-17	2021	10	3	0	9	17.67	35.1804	25.3008	8.49	1.4	3	5.85	0.07	0.51	0.35	0.91	109	15
2021-10-03-00-14-05	2021	10	3	0	14	42.43	35.1342	25.2284	9.88	1.8	4	7.65	0.1	0.69	0.5	1.42	134	11
2021-10-03-00-56-55	2021	10	3	0	56	55.35	35.1946	25.3029	7.48	2.7	3	6.17	0.11	0.36	0.23	0.72	112	33
2021-10-03-00-59-08	2021	10	3	0	59	8.69	35.1367	25.2306	9.7	2.3	4	6.65	0.13	0.44	0.28	0.65	87	21
2021-10-03-01-04-38	2021	10	3	1	4	37.89	35.1244	25.2424	8.22	2.6	4	5.5	0.13	0.36	0.24	0.92	69	27
2021-10-03-01-22-45	2021	10	3	1	22	46.87	35.1616	25.2514	9.81	1.7	2	5.69	0.15	0.59	0.48	1.12	122	18
2021-10-03-01-36-40	2021	10	3	1	37	3.31	35.185	25.3024	8.56	2	3	5.38	0.05	0.63	0.62	0.84	175	11
2021-10-03-02-03-31	2021	10	3	2	3	31.32	35.1343	25.1959	10.29	3.5	4	8.4	0.09	0.37	0.26	0.76	94	51
2021-10-03-02-17-25	2021	10	3	2	17	25.78	35.1384	25.1957	10.9	1.1	4	4.83	0.1	0.62	0.42	0.79	98	11
2021-10-03-02-17-39	2021	10	3	2	17	39.8	35.1377	25.2241	8.43	1.3	4	6.85	0.09	0.5	0.56	1.35	114	11
2021-10-03-02-33-07	2021	10	3	2	33	7.93	35.1562	25.2414	11.28	1.4	2	6.96	0.13	0.57	0.44	0.82	91	13
2021-10-03-02-36-40	2021	10	3	2	36	40.65	35.1586	25.2815	7.74	1.3	2	5.05	0.16	0.55	0.42	1.24	134	12
2021-10-03-02-39-47	2021	10	3	2	39	47.56	35.1463	25.2119	13.35	1.5	4	6.13	0.13	0.65	0.49	0.79	89	13
2021-10-03-02-44-36	2021	10	3	2	44	36.77	35.1374	25.23	9.1	2.1	4	6.65	0.1	0.52	0.37	0.93	87	11
2021-10-03-03-05-22	2021	10	3	3	5	23.09	35.1257	25.2391	7.51	1.2	4	5.07	0.1	0.51	0.43	0.89	75	11
2021-10-03-03-06-33	2021	10	3	3	6	34.08	35.1525	25.2546	9.9	1.5	2	7.33	0.13	0.56	0.43	1	107	12
2021-10-03-03-18-52	2021	10	3	3	18	53.05	35.1364	25.2302	8.81	1.2	4	7.22	0.1	0.56	0.39	0.79	88	12
2021-10-03-03-19-45	2021	10	3	3	20	38.34	35.1401	25.2493	7.21	2	4	6.39	0.15	0.44	0.33	1.1	74	16
2021-10-03-03-22-23	2021	10	3	3	22	23.4	35.1452	25.2902	6.87	2.6	4	3.6	0.12	0.41	0.27	1.05	87	27
2021-10-03-03-46-47	2021	10	3	3	46	46.63	35.1606	25.231	10.87	2.7	2	7.54	0.11	0.36	0.26	0.72	73	31
2021-10-03-03-59-41	2021	10	3	3	59	41.27	35.1824	25.2937	9.43	1.8	3	5.94	0.12	0.59	0.42	0.91	109	11
2021-10-03-04-11-16	2021	10	3	4	11	55.64	35.1932	25.3022	7.39	2	3	5.48	0.14	0.41	0.3	0.36	113	13
2021-10-03-04-38-02	2021	10	3	4	38	53.79	35.1978	25.3061	7.38	2	3	6.18	0.09	0.37	0.29	0.79	113	14
2021-10-03-04-40-04	2021	10	3	4	40	3.91	35.1965	25.307	7.3	1.9	3	6.12	0.14	0.46	0.35	0.85	115	14
2021-10-03-04-47-41	2021	10	3	4	47	40.51	35.1584	25.231	12.12	2.1	2	8.95	0.13	0.55	0.39	1.02	125	11
2021-10-03-05-07-28	2021	10	3	5	7	27.83	35.182	25.245	9.96	2.5	2	5.39	0.11	0.37	0.24	0.59	68	34
2021-10-03-05-07-58	2021	10	3	5	7	58.8	35.1542	25.2176	11.67	2.2	4	6.87	0.13	0.46	0.45	1.25	95	12
2021-10-03-05-10-00	2021	10	3	5	9	59.88	35.1426	25.2055	13.62	2.4	4	6.72	0.12	0.65	0.39	1.01	91	11
2021-10-03-05-23-29	2021	10	3	5	23	29.18	35.1358	25.2344	9.47	2.6	4	7.65	0.12	0.7	0.44	1.59	144	15
2021-10-03-05-32-08	2021	10	3	5	33	7.37	35.1543	25.2337	10.61	2.4	2	7.06	0.12	0.39	0.26	0.74	68	22
2021-10-03-06-48-40	2021	10	3	6	48	56.84	35.1422	25.1955	12.92	1.9	4	4.45	0.09	0.72	0.69	1.32	141	11
2021-10-03-07-00-43	2021	10	3	7	0	43.18	35.1628	25.2473	8.96	1.6	2	6.24	0.13	0.38	0.56	0.99	125	11
2021-10-03-08-15-53	2021	10	3	8	15	53.74	35.1898	25.3085	7.04	1.6	3	5.44	0.1	0.4	0.38	1.02	108	11
2021-10-03-09-21-54	2021	10	3	9	23	16.47	35.1342	25.2332	10.22	2.1	4	8.28	0.08	0.38	0.27	0.67	72	15
2021-10-03-09-24-05	2021	10	3	9	24	5.47	35.137	25.2757	6.37	2.1	4	4.36	0.12	0.4	0.3	0.88	86	11
2021-10-03-10-00-13	2021	10	3	10	0	14.1	35.1516	25.2305	11.24	1.8	4	7.95	0.12	0.43	0.3	0.94	71	13
2021-10-03-10-27-55	2021	10	3	10	27	54.73	35.204	25.3024	7.66	2.4	3	5.5	0.13	0.39	0.28	1.22	122	20
2021-10-03-10-33-15	2021	10	3	10	33	40.89	35.2044	25.301	7.59	1.7	3	5.36	0.12	0.48	0.33	1.13	125	11
2021-10-03-11-03-41	2021	10	3	11	4	50.5	35.1958	25.3064	7.41	1.9	3	5.86	0.11	0.54	0.38	1.24	112	11
2021-10-03-11-08-57	2021	10	3	11	8	57.97	35.1861	25.2998	7.7	1.9	3	5.71	0.09	0.54	0.47	1.07	170	11
2021-10-03-11-12-54	2021	10	3	11	12	53.3	35.185	25.3001	8.15	2.7	3	5.56	0.14	0.38	0.24	0.71	110	30
2021-10-03-11-15-33	2021	10	3	11	16	0.0199966	35.1867	25.3051	8.4	1.7	3	5.84	0.07	0.86	0.5	1.29	174	11
2021-10-03-11-19-13	2021	10	3	11	19	51.45	35.1887	25.2991	7.64	1.5	3	6.13	0.12	0.6	0.65	1.38	175	11
2021-10-03-11-24-40	2021	10	3	11	25	2.82	35.1341	25.2278	9.09	1.4	4	6.46	0.06	0.61	0.48	1.06	125	11
2021-10-03-11-40-12	2021	10	3	11	40	11.4	35.1254	25.25	8.06	2.7	4	5.15	0.12	0.36	0.24	0.78	73	24
2021-10-03-11-48-48	2021	10	3	11	48	59.15	35.1905	25.3068	6.95	1.3	3	5.75	0.07	0.55	0.35	1.15	114	11
2021-10-03-11-51-47	2021	10	3	11	52	24.51	35.138	25.2163	10.28	1.7	4	6.65	0.1	0.62	0.5	1.34	130	11
2021-10-03-11-53-55	2021	10	3	11	54	54.06	35.1525	25.2342	11.28	1.6	4	8.33	0.13	0.56	0.39	1.22	68	11
2021-10-03-12-00-02	2021	10	3	12	1	5.87	35.1975	25.3066	7.17	1.6	3	6.75	0.09	0.64	0.75	1.33	189	11
2021-10-03-12-15-59	2021	10	3	12	16	55.85	35.1612	25.2552	11.96	1.5	2	6.19	0.1	0.49	0.39	1.08	108	11
2021-10-03-12-20-15	2021	10	3	12	20	15.68	35.1679	25.2349	10.22	1.7	2	7	0.1	0.49	0.35	0.91	68	11
2021-10-03-12-22-27	2021	10	3	12	23	10.91	35.1531	25.2163	10.89	1.8	4	6.61	0.07	0.53	0.88	1.89	132	11
2021-10-03-12-35-28	2021	10	3	12	35	28.69	35.1752	25.3491	9.14	1.9	3	4.83	0.1	0.33	0.22	0.64	116	17
2021-10-03-13-03-51	2021	10	3	13	4	19.76	35.1439	25.2542	8.92	1.6	4	6.45	0.1	0.5	0.45	1.35	101	11
2021-10-03-13-09-56	2021	10	3	13	10	44.02	35.1805	25.2997	8.09	2.1	3	5.15	0.11	0.56	0.63	1.26	173	11
2021-10-03-13-13-15	2021	10	3	13	13	14.56	35.1803	25.3006	8.37	1.7	3	5.4	0.21	0.35	0.32	0.72	113	18
2021-10-03-13-39-25	2021	10	3	13	39	40.9	35.147	25.2356	10.42	1.8	4	6.69	0.15	0.7	0.47	1.28	123	11
2021-10-03-14-15-19	2021	10	3	14	15	19.04	35.1566	25.2349	10.88	3	2	7.69	0.11	0.38	0.26	0.7	69	50
2021-10-03-14-25-14	2021	10	3	14	25	14.81	35.126	25.2504	7.71	3.3	4	4.84	0.1	0.36	0.24	0.86	71	56
2021-10-03-14-31-26	2021	10	3	14	31	26.74	35.1571	25.2365	11.12	3.6	2	8.05	0.13	0.35	0.23	0.64	70	82
2021-10-03-14-40-44	2021	10	3	14	40	43.9	35.1253	25.2488	7.73	2.4	4	5.34	0.11	0.33	0.23	0.78	73	26
2021-10-03-15-10-51	2021	10	3	15	11	39.77	35.1903	25.2658	8.55	2.1	2	3.93	0.11	0.56	0.43	1.52	95	11
2021-10-03-15-31-27	2021	10	3	15	31	50.43	35.1875	25.264	8.72	1.3	2	3.75	0.13	0.56	0.65	1.42	157	11
2021-10-03-16-09-57	2021	10	3	16	9	56.74	35.1246	25.2437	8.22	2.3	4	5.27	0.12	0.33	0.25	0.73	69	29
2021-10-03-17-08-42	2021	10	3	17	8	41.44	35.1231	25.2437	8.15	2.7	4	5.46	0.11	0.32	0.24	0.62	68	37
2021-10-03-17-21-52	2021	10	3	17	22	1.84	35.1964	25.3064	7.34	1.9	3	6.12	0.2	0.41	0.29	1.11	122	21
2021-10-03-17-33-42	2021	10	3	17	33	54	35.14	25.2547	8.02	2.3	4	5.78	0.14	0.36	0.25	0.63	77	28
2021-10-03-17-36-28	2021	10	3	17	36	27.92	35.1965	25.3069	7.24	1.7	3	6.21	0.2	0.41	0.27	0.84	125	20
2021-10-03-18-02-01	2021	10	3	18	2	1.96	35.127	25.249	7.65	1.3	4	5.62	0.11	0.47	0.37	0.98	79	11
2021-10-03-18-02-44	2021	10	3	18	2	44.92	35.1395	25.2581	7.97	2.1	4	5.96	0.13	0.29	0.22	0.59	76	20
2021-10-03-18-03-19	2021	10	3	18	3	17.64	35.2054	25.3213	6.52	2.7	3	6.87	0.16	0.32	0.24	1.1	128	55
2021-10-03-18-10-58	2021	10	3	18	10	58.68	35.1506	25.2257	11.03	1.9	4	8.17	0.14	0.4	0.25	0.56	77	24
2021-10-03-18-56-54	2021	10	3	18	57	28.06	35.1972	25.2923	10.08	1.6	3	6.14	0.03	0.61	0.58	1.68	161	11
2021-10-03-19-33-17	2021	10	3	19	33	17.26	35.1647	25.2556	10.32	2.8	2	7.25	0.13	0.31	0.23	0.65	74	42
2021-10-03-20-03-35	2021	10	3	20	3	35.64	35.1984	25.3085	6.96	1.9	3	6.15	0.1	0.39	0.38	1.19	115	11
2021-10-03-20-05-17	2021	10	3	20	5	17.48	35.1252	25.2386	8.26	2.1	4	5.79	0.11	0.32	0.24	0.66	70	16
2021-10-03-20-15-31	2021	10	3	20	15	31.52	35.124	25.2441	8.1	2.5	4	5.43	0.13	0.31	0.24	0.55	70	35
2021-10-03-20-18-51	2021	10	3	20	18	52.16	35.1222	25.2423	8.4	3.5	4	4.44	0.13	0.35	0.24	0.58	70	50
2021-10-03-20-42-57	2021	10	3	20	42	57.66	35.126	25.2502	7.5	2.9	4	5.57	0.14	0.31	0.24	0.71	70	37
2021-10-03-20-43-53	2021	10	3	20	43	53.72	35.1245	25.2433	7.52	2.3	4	5.21	0.1	0.3	0.21	0.59	75	20
2021-10-03-20-55-24	2021	10	3	20	56	3.64	35.1229	25.2425	8.03	1.6	4	5.45	0.09	0.57	0.44	1.27	106	11
2021-10-03-21-00-23	2021	10	3	21	0	23.6	35.1422	25.2664	8.22	2.1	4	6.16	0.14	0.35	0.25	0.7	74	19
2021-10-03-21-02-13	2021	10	3	21	2	13.32	35.1975	25.3055	7.33	2.2	3	6.1	0.13	0.36	0.26	0.76	113	15
2021-10-03-21-06-30	2021	10	3	21	6	30.64	35.1233	25.2441	7.84	3	4	5.41	0.1	0.31	0.22	0.59	73	38
2021-10-03-21-10-10	2021	10	3	21	10	10.16	35.1982	25.3126	6.93	3.1	3	6.57	0.12	0.34	0.22	0.75	120	35
2021-10-03-21-20-59	2021	10	3	21	20	59.14	35.1499	25.2183	9.09	2.4	4	6.99	0.2	0.41	0.32	0.71	83	36
2021-10-03-21-21-53	2021	10	3	21	21	53.38	35.1494	25.2164	9.23	2.8	4	7.03	0.14	0.38	0.28	0.75	84	29
2021-10-03-21-37-11	2021	10	3	21	37	11.04	35.1449	25.2282	10.92	1.9	4	6.7	0.15	0.41	0.28	0.62	84	20
2021-10-03-21-38-50	2021	10	3	21	38	50.44	35.1954	25.3024	7.03	1.9	3	6.24	0.16	0.41	0.28	1.12	123	13
2021-10-03-21-45-29	2021	10	3	21	46	19.64	35.1517	25.2339	11.31	1.8	4	8.24	0.1	0.55	0.38	0.96	76	11
2021-10-03-22-17-04	2021	10	3	22	17	35.84	35.1246	25.2411	7.98	2	4	4.58	0.09	0.45	0.39	1.2	117	11
2021-10-03-22-30-00	2021	10	3	22	30	0.959999	35.1507	25.2306	11.01	2.6	4	8.23	0.11	0.33	0.23	0.56	72	44
2021-10-03-22-39-45	2021	10	3	22	39	45.48	35.1539	25.2325	11.07	3.3	4	8.17	0.14	0.36	0.25	0.56	74	57
2021-10-03-22-41-15	2021	10	3	22	41	15.36	35.1397	25.227	9.84	3.4	4	7.36	0.12	0.34	0.24	0.65	82	53
2021-10-03-22-51-59	2021	10	3	22	51	59.36	35.193	25.3097	7.16	2.8	3	6.16	0.13	0.36	0.21	0.61	116	40
2021-10-03-23-09-19	2021	10	3	23	9	19.32	35.1527	25.2318	11.12	2	4	8.35	0.12	0.37	0.27	0.61	75	26
2021-10-03-23-15-13	2021	10	3	23	15	13.48	35.2043	25.3003	6.95	1.7	3	4.27	0.18	0.47	0.33	1.01	117	12
2021-10-03-23-19-00	2021	10	3	23	19	0.239998	35.1398	25.2237	8.57	2.1	4	7.65	0.1	0.48	0.37	1.19	78	11
2021-10-03-23-21-03	2021	10	3	23	21	2.36	35.1523	25.2294	10.87	2.3	4	7.99	0.13	0.41	0.28	0.74	72	29
2021-10-03-23-25-25	2021	10	3	23	25	24.84	35.1256	25.2409	7.49	2.9	4	5.03	0.11	0.39	0.27	0.55	75	35
2021-10-03-23-41-24	2021	10	3	23	41	24.6	35.1789	25.2805	8.37	1.4	3	5.85	0.22	0.83	0.6	1.49	142	11
2021-10-03-23-49-49	2021	10	3	23	49	48.66	35.139	25.2316	8.8	3.1	4	6.54	0.11	0.38	0.24	0.6	73	56
2021-10-04-00-06-01	2021	10	4	0	6	0.970001	35.1221	25.2432	8.24	2.3	4	5.47	0.12	0.36	0.24	0.31	72	20
2021-10-04-00-07-57	2021	10	4	0	7	56.96	35.1541	25.2331	11.49	1.5	2	7.34	0.17	0.48	0.37	0.7	68	11
2021-10-04-00-39-12	2021	10	4	0	39	11.96	35.1244	25.2414	7.87	2.5	4	4.84	0.13	0.38	0.27	0.85	73	23
2021-10-04-00-40-42	2021	10	4	0	40	43.11	35.1551	25.23	10.02	2.3	2	8.31	0.14	0.43	0.33	0.84	76	16
2021-10-04-00-58-31	2021	10	4	0	58	52.8	35.1293	25.2561	6.58	2.4	4	12.29	0.1	1.05	1.34	0.67	311	12
2021-10-04-01-13-02	2021	10	4	1	13	3.08	35.1476	25.2367	8.01	1.4	4	7.84	0.16	0.61	0.43	1.27	99	11
2021-10-04-01-20-50	2021	10	4	1	20	49.74	35.1236	25.2429	7.96	2.1	4	5.17	0.09	0.42	0.3	1.01	70	14
2021-10-04-01-41-50	2021	10	4	1	41	51.18	35.1236	25.244	8.1	1.6	4	5.21	0.1	0.53	0.39	0.94	82	11
2021-10-04-02-00-37	2021	10	4	2	0	37.64	35.1236	25.246	8.58	1.4	4	4.94	0.14	0.6	0.42	1.16	85	11
2021-10-04-02-14-13	2021	10	4	2	14	29.08	35.1351	25.2291	9.15	2.2	4	6.76	0.09	0.36	0.26	0.55	86	17
2021-10-04-02-29-56	2021	10	4	2	29	56.22	35.1367	25.2303	8.97	2.4	4	7.04	0.11	0.35	0.25	0.72	87	27
2021-10-04-02-31-57	2021	10	4	2	31	57.4	35.1371	25.2289	9.21	2.1	4	6.53	0.12	0.34	0.24	0.61	88	20
2021-10-04-02-35-19	2021	10	4	2	35	19.57	35.126	25.2418	7.73	2	4	4.32	0.1	0.49	0.36	1.11	79	13
2021-10-04-02-53-06	2021	10	4	2	53	6.58	35.1259	25.2434	8.07	1.9	4	4.91	0.13	0.39	0.25	0.56	79	19
2021-10-04-03-19-53	2021	10	4	3	19	53.42	35.1235	25.2436	8.16	1.6	4	5.02	0.11	0.36	0.28	0.84	75	14
2021-10-04-03-23-27	2021	10	4	3	23	27.34	35.1248	25.24	7.62	1.4	4	4.92	0.09	0.54	0.36	0.79	74	11
2021-10-04-03-29-45	2021	10	4	3	29	45.33	35.1745	25.3023	7.78	3	3	4.14	0.12	0.38	0.23	0.69	105	38
2021-10-04-03-42-30	2021	10	4	3	42	29.82	35.1251	25.2405	8.23	1.8	4	5.28	0.13	0.34	0.25	0.74	72	17
2021-10-04-03-56-20	2021	10	4	3	56	19.87	35.1759	25.2959	7.53	2.4	3	4.22	0.08	0.48	0.31	0.72	117	13
2021-10-04-03-58-53	2021	10	4	3	58	53.57	35.1236	25.2423	8.31	1.5	4	4.84	0.13	0.46	0.33	0.85	88	11
2021-10-04-04-21-55	2021	10	4	4	21	56.11	35.1223	25.2425	8.02	2.2	4	5.08	0.12	0.38	0.26	0.5	74	17
2021-10-04-04-22-37	2021	10	4	4	23	38.05	35.2132	25.3144	7.5	1.9	3	4.82	0.11	0.49	0.35	0.9	123	11
2021-10-04-04-32-06	2021	10	4	4	32	5.54	35.1273	25.2462	6.85	2.3	4	5.89	0.11	0.37	0.26	0.86	76	22
2021-10-04-04-36-51	2021	10	4	4	37	30.49	35.123	25.241	8.15	1.9	4	5.03	0.1	0.4	0.3	1.05	76	11
2021-10-04-04-43-53	2021	10	4	4	44	1.2	35.1291	25.2368	8.03	1.7	4	5.97	0.08	0.44	0.3	1.15	73	11
2021-10-04-04-46-20	2021	10	4	4	46	20.88	35.1249	25.2418	8.28	1.9	4	4.79	0.12	0.47	0.33	0.7	79	13
2021-10-04-04-50-51	2021	10	4	4	50	51.26	35.1368	25.2292	9.35	1.8	4	6.09	0.1	0.43	0.27	0.99	91	15
2021-10-04-05-23-58	2021	10	4	5	23	58.06	35.1693	25.2357	10.26	1.7	2	5.2	0.17	0.54	0.37	0.95	71	12
2021-10-04-05-37-40	2021	10	4	5	37	40.28	35.1732	25.2407	8.07	1.8	2	4.82	0.13	0.48	0.35	0.88	80	12
2021-10-04-06-12-13	2021	10	4	6	12	13.06	35.1155	25.2514	8.35	2.4	4	5.22	0.13	0.55	0.39	1.04	83	11
2021-10-04-06-37-30	2021	10	4	6	37	29.75	35.1894	25.3084	7.48	2.4	3	6.15	0.11	0.56	0.42	1.09	129	12
2021-10-04-06-46-52	2021	10	4	6	46	51.63	35.1242	25.2417	8.12	2.8	4	4.72	0.12	0.43	0.31	0.9	77	22
2021-10-04-06-59-30	2021	10	4	6	59	31.27	35.1254	25.2404	7.82	2.7	4	4.98	0.11	0.44	0.35	1.02	70	13
2021-10-04-07-17-21	2021	10	4	7	17	21.03	35.1204	25.2416	7.78	2	4	5.59	0.1	0.54	0.35	1.22	74	11
2021-10-04-07-18-22	2021	10	4	7	18	22.78	35.1457	25.2186	10.64	2.2	4	6.74	0.14	0.57	0.36	0.93	87	11
2021-10-04-07-33-37	2021	10	4	7	33	37.03	35.1237	25.2418	8.62	2.1	4	5.2	0.1	0.49	0.33	0.86	75	12
2021-10-04-07-35-18	2021	10	4	7	36	0.739998	35.1954	25.3061	5.88	2	3	6.54	0.18	0.38	0.29	0.32	118	17
2021-10-04-07-43-06	2021	10	4	7	43	28.32	35.1825	25.2996	8.39	2.1	3	4.73	0.07	0.71	0.62	1.12	165	11
2021-10-04-07-50-19	2021	10	4	7	50	25.21	35.1251	25.2409	7.92	2.4	4	4.47	0.06	0.54	0.62	1.44	122	11
2021-10-04-08-05-29	2021	10	4	8	5	29.48	35.1977	25.3055	7.15	2.3	3	6.5	0.2	0.44	0.29	1.24	119	27
2021-10-04-08-22-33	2021	10	4	8	22	32.96	35.1858	25.3081	5.87	2.3	3	3.83	0.13	0.56	0.82	0.64	191	11
2021-10-04-08-24-25	2021	10	4	8	25	11.24	35.1793	25.2664	9.46	1.9	2	5.31	0.1	0.47	0.34	0.84	85	11
2021-10-04-08-37-48	2021	10	4	8	37	47.36	35.1994	25.3064	8.56	2.4	3	17.15	0.07	0.41	0.29	0.69	114	13
2021-10-04-09-29-42	2021	10	4	9	29	42.08	35.197	25.3045	7.36	2.3	3	5.46	0.11	0.42	0.29	0.8	118	18
2021-10-04-09-30-16	2021	10	4	9	30	16.18	35.1961	25.3012	7.44	1.9	3	6.62	0.09	0.47	0.56	0.98	124	11
2021-10-04-10-00-14	2021	10	4	10	0	38.51	35.1242	25.2408	7.91	2.5	4	4.63	0.15	0.37	0.26	0.81	75	22
2021-10-04-10-11-34	2021	10	4	10	12	23.11	35.12	25.2415	7.89	2.3	4	7.36	0.09	0.91	0.47	1.5	206	11
2021-10-04-10-16-07	2021	10	4	10	16	7.83	35.1396	25.2311	9.61	2	4	6.26	0.1	0.57	0.34	0.97	79	12
2021-10-04-10-16-43	2021	10	4	10	16	43.46	35.1849	25.3	8.63	1.8	3	6.05	0.11	0.45	0.35	1.04	111	11
2021-10-04-10-18-07	2021	10	4	10	18	6.85	35.1976	25.3065	7.55	1.8	3	5.51	0.11	0.45	0.35	0.93	117	11
2021-10-04-10-20-29	2021	10	4	10	20	28.75	35.1321	25.249	9.37	2.4	4	6.06	0.13	0.35	0.25	0.62	71	20
2021-10-04-10-50-32	2021	10	4	10	50	32.52	35.1379	25.2296	9.15	1.9	4	5.94	0.18	0.47	0.35	0.89	82	12
2021-10-04-11-25-10	2021	10	4	11	25	52.73	35.1536	25.2995	5.97	2	4	2.95	0.06	0.55	0.33	0.38	143	11
2021-10-04-11-51-35	2021	10	4	11	51	35.08	35.1236	25.2443	7.9	1.3	4	6.03	0.1	0.48	0.35	1.05	83	12
2021-10-04-11-52-40	2021	10	4	11	52	40.45	35.1931	25.3032	7.62	1.9	3	5.68	0.14	0.35	0.26	0.66	116	17
2021-10-04-11-59-30	2021	10	4	12	0	34.91	35.1797	25.2866	8.45	2.2	3	6.32	0.05	0.58	0.62	1.44	146	11
2021-10-04-12-20-27	2021	10	4	12	20	27.23	35.1345	25.2572	7.55	1.8	4	6	0.14	0.41	0.29	0.99	76	12
2021-10-04-12-22-48	2021	10	4	12	22	48.25	35.1939	25.3094	6.87	1.8	3	6.1	0.18	0.49	0.35	1.06	110	11
2021-10-04-12-59-13	2021	10	4	12	59	13.4	35.2023	25.3189	6.85	1.6	3	6.43	0.07	0.62	0.61	1.08	182	11
2021-10-04-13-18-17	2021	10	4	13	18	16.59	35.1578	25.2436	9.88	2	2	7.69	0.17	0.45	0.31	0.89	68	17
2021-10-04-13-32-25	2021	10	4	13	32	37.81	35.1351	25.2295	9.35	2.4	4	5.72	0.09	0.47	0.41	1.1	93	12
2021-10-04-13-50-16	2021	10	4	13	51	8.3	35.1546	25.2191	10.43	2	4	6.91	0.14	0.44	0.29	0.83	82	18
2021-10-04-14-31-32	2021	10	4	14	31	34.62	35.1388	25.2292	9.14	2.7	4	6.3	0.11	0.32	0.23	0.67	82	26
2021-10-04-14-48-29	2021	10	4	14	48	29.32	35.2023	25.2992	6.68	2.3	3	5.43	0.13	0.34	0.21	0.85	123	19
2021-10-04-14-59-40	2021	10	4	14	59	40.39	35.1219	25.2463	7.36	2.5	4	5.57	0.15	0.31	0.22	0.75	69	24
2021-10-04-15-28-33	2021	10	4	15	28	32.85	35.1067	25.226	9.39	2.2	4	5.42	0.11	0.52	0.37	1.27	126	11
2021-10-04-15-57-37	2021	10	4	15	57	37.89	35.1393	25.2223	8.71	2	4	7.38	0.08	0.47	0.42	1.07	101	11
2021-10-04-16-14-34	2021	10	4	16	14	34.62	35.1361	25.229	9.61	2.2	4	7.24	0.08	0.31	0.24	0.64	78	26
2021-10-04-16-39-54	2021	10	4	16	39	54.49	35.1296	25.232	8.26	2.1	4	7.42	0.12	0.45	0.3	0.91	67	13
2021-10-04-16-43-26	2021	10	4	16	43	26.25	35.1399	25.2294	9.2	3.2	4	6.25	0.12	0.31	0.22	0.59	76	35
2021-10-04-16-56-30	2021	10	4	16	56	29.75	35.1379	25.2287	9.02	2.4	4	7.44	0.12	0.36	0.25	0.69	77	19
2021-10-04-17-43-24	2021	10	4	17	43	26	35.1423	25.1873	11.76	1.6	4	3.85	0.12	0.61	0.47	1.07	112	11
2021-10-04-17-45-51	2021	10	4	17	46	27.18	35.185	25.2997	8.1	1.6	3	6.55	0.1	0.52	0.37	1.64	113	11
2021-10-04-17-51-57	2021	10	4	17	51	57.76	35.1369	25.2344	9.85	1.6	4	7.17	0.12	0.75	0.5	1.33	107	11
2021-10-04-18-13-24	2021	10	4	18	13	26.84	35.1425	25.2509	7.98	1.4	4	6.08	0.07	0.57	0.42	1.01	108	11
2021-10-04-18-40-52	2021	10	4	18	40	53.68	35.1365	25.2313	9.26	2.4	4	6.58	0.09	0.48	0.36	1.13	79	11
2021-10-04-18-45-18	2021	10	4	18	45	18.3	35.1964	25.3096	7.33	1.9	3	6.88	0.16	0.47	0.36	0.98	127	12
2021-10-04-19-30-30	2021	10	4	19	30	30.96	35.1799	25.2971	8.16	1.7	3	4.25	0.15	0.41	0.31	0.92	105	11
2021-10-04-19-41-44	2021	10	4	19	41	44.48	35.1556	25.2192	10.03	2.3	4	7.68	0.11	0.33	0.23	0.6	80	22
2021-10-04-20-06-14	2021	10	4	20	6	15.56	35.1969	25.3054	7.37	2.3	3	5.08	0.15	0.38	0.24	0.84	119	30
2021-10-04-20-22-43	2021	10	4	20	22	42.4	35.1867	25.3016	8.19	2.6	3	5.94	0.13	0.39	0.23	0.59	113	38
2021-10-04-20-38-08	2021	10	4	20	38	8.48	35.1955	25.3021	7.25	1.8	3	5.79	0.13	0.51	0.33	1.25	114	11
2021-10-04-21-10-19	2021	10	4	21	10	19.76	35.1512	25.2337	11.79	1.8	4	8.28	0.26	0.52	0.33	0.88	70	20
2021-10-04-21-21-16	2021	10	4	21	21	15.9	35.1906	25.3305	4.21	2.8	3	4.31	0.12	0.35	0.21	0.33	111	29
2021-10-04-22-11-45	2021	10	4	22	12	45.66	35.1816	25.23	8.06	2.2	2	4.82	0.15	0.32	0.23	0.68	68	33
2021-10-04-22-28-49	2021	10	4	22	28	49.4	35.1723	25.254	10.74	3	2	6.2	0.16	0.41	0.25	0.68	77	43
2021-10-04-22-37-12	2021	10	4	22	37	12.62	35.1979	25.3116	6.62	1.7	3	6.3	0.15	0.43	0.25	0.94	116	18
2021-10-04-22-38-00	2021	10	4	22	37	59.92	35.1837	25.2934	7.63	1.6	3	7.15	0.1	0.4	0.27	0.87	125	15
2021-10-04-22-55-14	2021	10	4	22	56	3.3	35.1313	25.2371	8.14	1.7	4	6.41	0.11	0.56	0.4	1.15	110	11
2021-10-04-22-57-48	2021	10	4	22	57	48.02	35.1426	25.23	10.36	2	4	8.13	0.15	0.43	0.28	0.7	74	29
2021-10-04-23-24-38	2021	10	4	23	24	38.08	35.1596	25.2339	10.14	2.8	2	6.54	0.12	0.35	0.22	0.55	67	35
2021-10-04-23-29-01	2021	10	4	23	29	1.04	35.1595	25.2349	10.34	2	2	7.75	0.13	0.36	0.26	0.71	72	25
2021-10-04-23-29-26	2021	10	4	23	29	26.26	35.1206	25.2441	7.56	1.3	4	4.3	0.14	0.58	0.4	0.99	99	12
2021-10-04-23-31-00	2021	10	4	23	31	0.279999	35.1379	25.2317	9.87	1.8	4	6.47	0.13	0.39	0.28	0.67	78	20
2021-10-04-23-37-08	2021	10	4	23	37	8.4	35.1596	25.2339	10.02	2	2	6.58	0.13	0.4	0.26	0.71	68	17
2021-10-04-23-46-31	2021	10	4	23	46	31.6	35.1845	25.3031	8.79	1.8	3	5.52	0.12	0.4	0.25	0.6	110	23
2021-10-04-23-47-35	2021	10	4	23	48	26.72	35.1668	25.2357	10.2	1.9	2	6.06	0.15	0.39	0.28	0.71	66	19
2021-10-04-23-50-23	2021	10	4	23	50	23.92	35.1847	25.2523	8.86	1.6	2	4.5	0.15	0.42	0.29	0.69	82	17
2021-10-04-23-51-54	2021	10	4	23	51	54.52	35.1513	25.2334	11.39	1.1	4	7.93	0.11	0.44	0.34	0.79	75	12
2021-10-04-23-52-28	2021	10	4	23	52	28.72	35.1371	25.229	10.14	1.2	4	6.43	0.12	0.49	0.34	0.83	80	14
2021-10-04-23-59-56	2021	10	4	23	59	56.08	35.1869	25.3056	8.43	2.9	3	5.56	0.04	0.46	0.68	1.57	178	5
2021-10-05-00-08-43	2021	10	5	0	8	43.79	35.1836	25.2987	7.68	2	3	6.02	0.13	0.35	0.23	0.51	111	30
2021-10-05-00-13-09	2021	10	5	0	13	9.43	35.1931	25.3067	8.15	2.1	3	5.73	0.13	0.34	0.23	0.69	113	27
2021-10-05-00-15-17	2021	10	5	0	15	17.8	35.1305	25.241	7.04	2.2	4	5.47	0.09	0.36	0.24	0.52	77	25
2021-10-05-01-14-54	2021	10	5	1	14	54.69	35.1225	25.2479	7.11	1.5	4	4.9	0.16	0.45	0.32	0.83	78	16
2021-10-05-01-40-06	2021	10	5	1	40	6.46	35.1263	25.2579	7.62	1.3	4	5.94	0.17	0.53	0.35	1.04	85	13
2021-10-05-01-57-03	2021	10	5	1	57	3.05	35.2032	25.3022	7.43	3	3	4.81	0.13	0.38	0.24	0.7	123	41
2021-10-05-02-02-15	2021	10	5	2	2	15.67	35.1982	25.2868	8.56	1.3	3	3.6	0.12	0.51	0.32	0.87	122	14
2021-10-05-02-02-46	2021	10	5	2	2	45.99	35.2017	25.2984	7.79	1.7	3	5.4	0.13	0.38	0.26	1	125	19
2021-10-05-02-18-04	2021	10	5	2	18	43.29	35.1482	25.2132	10.02	1.7	4	6.92	0.14	0.44	0.29	0.79	83	19
2021-10-05-02-20-38	2021	10	5	2	20	38.84	35.1829	25.301	9.03	2.2	3	5.42	0.13	0.33	0.25	0.72	109	29
2021-10-05-02-24-27	2021	10	5	2	25	53.03	35.1354	25.2291	9.38	2.6	4	7.75	0.03	1.18	0.53	1.42	182	11
2021-10-05-02-32-28	2021	10	5	2	32	43.36	35.1951	25.3045	7.33	2	3	6.93	0.12	0.8	0.53	0.59	191	11
2021-10-05-02-38-09	2021	10	5	2	38	9.71	35.146	25.2285	10.65	2.1	4	8.22	0.19	0.47	0.31	0.85	73	28
2021-10-05-02-40-51	2021	10	5	2	40	51.08	35.1472	25.2293	10.49	2.3	4	8.08	0.15	0.36	0.26	0.63	76	28
2021-10-05-02-43-07	2021	10	5	2	43	7.25	35.2058	25.3024	7.62	2	3	5.2	0.2	0.44	0.29	1	130	25
2021-10-05-03-28-18	2021	10	5	3	29	15.9	35.1415	25.2332	9.18	1.7	4	6.7	0.09	0.53	0.34	1.05	78	11
2021-10-05-03-39-10	2021	10	5	3	39	10.94	35.1446	25.227	9.75	2.1	4	8.37	0.15	0.4	0.28	0.84	74	29
2021-10-05-03-51-48	2021	10	5	3	51	48.29	35.1241	25.2422	8.1	2.6	4	5.44	0.12	0.41	0.26	0.52	73	29
2021-10-05-04-01-14	2021	10	5	4	1	13.88	35.1329	25.2256	9.04	2.3	4	6.29	0.08	0.34	0.26	0.82	84	17
2021-10-05-04-08-58	2021	10	5	4	9	8.64	35.1126	25.2516	9.96	1.9	4	4.26	0.2	0.77	0.54	1.48	116	11
2021-10-05-04-11-59	2021	10	5	4	11	59.37	35.1212	25.238	10.57	1.9	4	4.97	0.12	0.54	0.39	1.14	93	12
2021-10-05-04-30-08	2021	10	5	4	30	8.97	35.1148	25.2488	9.39	1.4	4	3.62	0.12	0.54	0.35	0.78	77	12
2021-10-05-04-36-55	2021	10	5	4	36	55.43	35.1357	25.2306	9.54	2.8	4	6.23	0.09	0.37	0.27	0.81	87	19
2021-10-05-05-08-08	2021	10	5	5	8	8.88	35.1363	25.2226	8.74	1.5	4	6.51	0.13	0.49	0.36	0.85	70	12
2021-10-05-05-16-47	2021	10	5	5	16	47.1	35.1982	25.3043	7.53	2.4	3	5.96	0.22	0.49	0.34	1.17	118	18
2021-10-05-05-18-29	2021	10	5	5	18	30.1	35.1322	25.2263	8.84	1.9	4	7.43	0.14	0.59	0.4	0.9	81	11
2021-10-05-05-23-13	2021	10	5	5	23	13	35.1147	25.249	9.16	2.6	4	4.09	0.09	0.38	0.27	0.52	77	19
2021-10-05-05-38-30	2021	10	5	5	39	47.84	35.1462	25.2286	10.72	3	4	7.44	0.13	0.45	0.31	0.85	80	26
2021-10-05-05-47-41	2021	10	5	5	47	41.63	35.1406	25.2304	8.77	1.7	4	7.63	0.1	0.7	0.51	1.16	108	11
2021-10-05-05-48-11	2021	10	5	5	48	11.98	35.1674	25.2272	9.67	1.4	2	6.16	0.15	0.68	0.54	1.52	140	11
2021-10-05-05-51-31	2021	10	5	5	51	34.84	35.1519	25.2062	8.91	2.1	4	5.3	0.08	0.54	0.38	1.16	93	11
2021-10-05-06-46-39	2021	10	5	6	46	39.78	35.1442	25.2296	11.15	2.2	4	8.24	0.16	0.4	0.33	0.79	74	16
2021-10-05-06-51-43	2021	10	5	6	51	43.1	35.1404	25.2322	9.37	2.2	4	6.41	0.11	0.35	0.27	0.8	77	16
2021-10-05-06-55-04	2021	10	5	6	55	4.1	35.137	25.2003	11.17	1.6	4	5.01	0.14	0.53	0.38	1	99	11
2021-10-05-07-43-52	2021	10	5	7	43	52.3	35.1526	25.2334	10.81	1.8	4	7.91	0.15	0.5	0.34	0.79	71	15
2021-10-05-08-37-33	2021	10	5	8	37	33.74	35.1467	25.2293	10.38	3.2	4	7.68	0.11	0.34	0.25	0.64	80	50
2021-10-05-09-30-14	2021	10	5	9	31	9.65	35.1463	25.2448	7.14	1.8	4	7	0.11	0.42	0.32	1.01	68	12
2021-10-05-09-55-10	2021	10	5	9	55	11	35.1352	25.2265	8.18	1.6	4	7.31	0.09	0.58	0.45	1.33	108	11
2021-10-05-09-59-19	2021	10	5	10	0	12.61	35.1972	25.3055	7.38	1.8	3	5.99	0.12	0.42	0.28	0.84	113	13
2021-10-05-10-13-07	2021	10	5	10	13	7.91	35.1381	25.2293	9.3	2	4	6.44	0.08	0.63	0.36	1.32	110	11
2021-10-05-10-17-55	2021	10	5	10	17	55.15	35.1972	25.3045	7.59	1.7	3	6.97	0.12	0.37	0.29	1.15	128	12
2021-10-05-10-20-48	2021	10	5	10	20	48.51	35.1316	25.2285	9.68	2.3	4	5.86	0.1	0.41	0.3	0.78	89	15
2021-10-05-10-50-46	2021	10	5	10	50	46.51	35.1365	25.2291	9.18	1.5	4	6.92	0.11	0.61	0.36	0.92	83	11
2021-10-05-10-55-14	2021	10	5	10	55	14.78	35.1942	25.3053	7.45	2.4	3	5.41	0.14	0.39	0.26	0.92	112	17
2021-10-05-11-55-12	2021	10	5	11	55	13.02	35.1342	25.2301	10.41	1.5	4	6.16	0.11	0.61	0.43	1.13	79	11
2021-10-05-12-12-48	2021	10	5	12	12	48.47	35.1852	25.2988	8.61	2.6	3	5.53	0.12	0.39	0.25	0.7	110	29
2021-10-05-12-26-12	2021	10	5	12	26	12.35	35.1297	25.2639	7.31	1.3	4	5.86	0.12	0.44	0.33	0.93	81	11
2021-10-05-12-52-25	2021	10	5	12	52	25.58	35.1183	25.246	8.15	1.3	4	4.67	0.12	0.66	0.39	0.93	96	11
2021-10-05-12-53-00	2021	10	5	12	52	59.9	35.1738	25.238	11.19	1.1	2	5.78	0.14	0.75	0.45	1.27	101	11
2021-10-05-12-53-21	2021	10	5	12	53	21.89	35.1318	25.2243	8.56	1.2	4	6.24	0.14	0.71	0.41	0.96	83	11
2021-10-05-12-53-59	2021	10	5	12	53	59.83	35.1921	25.3158	6.73	1.4	3	5.96	0.12	0.57	0.49	1.14	179	11
2021-10-05-13-04-22	2021	10	5	13	5	6.64	35.177	25.2974	8.3	1.9	3	4.95	0.1	0.44	0.34	0.79	108	12
2021-10-05-13-47-32	2021	10	5	13	47	40.29	35.1876	25.3202	5.98	1.6	3	5.35	0.07	0.92	0.57	0.57	181	11
2021-10-05-14-11-14	2021	10	5	14	11	56.16	35.1898	25.3094	6.38	1.6	3	5.34	0.07	1.16	1.16	0.46	175	11
2021-10-05-14-20-50	2021	10	5	14	21	27.25	35.1231	25.2482	7.5	1.6	4	4.27	0.11	0.48	0.37	1.13	107	11
2021-10-05-14-36-37	2021	10	5	14	36	37.85	35.1371	25.227	8.94	1.7	4	5.53	0.08	0.7	0.58	1.27	139	11
2021-10-05-14-55-45	2021	10	5	14	56	11.11	35.1898	25.3138	6.61	1.5	3	5.83	0.14	0.62	0.64	1.39	177	11
2021-10-05-15-30-04	2021	10	5	15	30	4.55	35.1496	25.2312	10.35	1.7	4	7.18	0.13	0.69	0.46	1.31	82	11
2021-10-05-16-04-36	2021	10	5	16	4	36.56	35.1347	25.2302	8.74	1.5	4	7.06	0.11	0.59	0.38	0.94	90	11
2021-10-05-16-09-47	2021	10	5	16	9	46.81	35.187	25.2999	7.51	2	3	5.69	0.09	0.44	0.32	0.88	106	11
2021-10-05-16-16-11	2021	10	5	16	16	11.75	35.1785	25.2795	8.74	1.6	2	6.03	0.14	0.45	0.29	0.8	94	11
2021-10-05-16-52-53	2021	10	5	16	52	53.3	35.147	25.2303	10.13	1.7	4	9.13	0.13	0.75	0.43	1.58	177	11
2021-10-05-16-59-12	2021	10	5	16	59	37.71	35.1429	25.2301	10.82	1.8	4	7.65	0.08	0.9	0.41	1.2	160	11
2021-10-05-17-18-25	2021	10	5	17	18	25.62	35.127	25.2536	7.37	1.1	4	5.98	0.14	0.51	0.46	1.39	84	11
2021-10-05-17-41-46	2021	10	5	17	41	46.22	35.137	25.2724	9.65	1.3	4	4.94	0.12	0.64	0.5	1.32	83	14
2021-10-05-17-47-51	2021	10	5	17	47	51.14	35.1835	25.2607	8.67	1.2	2	2.72	0.11	0.63	0.51	0.97	113	11
2021-10-05-17-48-48	2021	10	5	17	48	48.3	35.1814	25.2803	9.48	1.3	2	6.74	0.23	0.56	0.43	1.27	118	11
2021-10-05-17-52-43	2021	10	5	17	52	43.58	35.1997	25.3064	7.57	1.7	3	6.14	0.08	0.52	0.32	1.05	116	11
2021-10-05-18-06-19	2021	10	5	18	7	9.42	35.1359	25.2256	10.73	1.8	4	6.32	0.1	0.52	0.35	0.79	87	11
2021-10-05-18-19-52	2021	10	5	18	19	52.64	35.1623	25.2414	9.64	1.1	2	5.76	0.16	0.69	0.43	1.04	115	11
2021-10-05-18-27-35	2021	10	5	18	27	35.16	35.1916	25.3054	6.89	1.3	3	5.6	0.09	0.64	0.41	0.92	125	11
2021-10-05-18-32-01	2021	10	5	18	32	1	35.197	25.3058	7.94	3.6	3	6.06	0.12	0.39	0.22	0.67	122	43
2021-10-05-18-35-49	2021	10	5	18	35	50.12	35.1455	25.2151	7.9	1.7	4	8.34	0.17	0.36	0.43	1.07	78	11
2021-10-05-18-37-42	2021	10	5	18	37	42.62	35.1986	25.3045	7.66	2	3	6.33	0.08	0.44	0.3	1.1	123	12
2021-10-05-18-49-32	2021	10	5	18	49	32.36	35.1627	25.2759	8.88	2.2	2	5.93	0.12	0.4	0.3	0.59	82	16
2021-10-05-18-56-14	2021	10	5	18	56	14.54	35.1245	25.2442	8.79	1.9	4	6.19	0.24	0.52	0.42	1.49	76	13
2021-10-05-19-22-09	2021	10	5	19	22	9.4	35.2009	25.3124	7.03	1.6	3	7.44	0.14	0.55	0.39	0.98	132	14
2021-10-05-19-55-10	2021	10	5	19	55	9.96	35.1306	25.2764	10.33	1.1	4	4.02	0.27	0.76	0.58	1.34	87	11
2021-10-05-19-56-34	2021	10	5	19	56	34.08	35.1359	25.1957	11.26	2.2	4	5.37	0.12	0.46	0.31	0.83	102	21
2021-10-05-20-17-35	2021	10	5	20	17	37.84	35.1985	25.3052	7.79	2.1	3	6.45	0.08	0.53	0.34	1.54	117	12
2021-10-05-20-21-16	2021	10	5	20	21	15.64	35.1514	25.2343	11.44	3.1	4	8.09	0.14	0.36	0.25	0.7	75	47
2021-10-05-20-36-12	2021	10	5	20	36	12.2	35.1538	25.2291	11.63	2.1	4	7.8	0.13	0.39	0.27	0.86	73	26
2021-10-05-20-47-00	2021	10	5	20	47	0.860001	35.1602	25.2281	12.3	1.5	2	8.26	0.17	0.54	0.41	1.18	71	13
2021-10-05-20-58-11	2021	10	5	20	58	11.44	35.1981	25.305	7.46	2	3	6.76	0.11	0.53	0.34	0.89	125	11
2021-10-05-21-00-10	2021	10	5	21	0	10.7	35.1489	25.2283	10.42	1.8	4	7.35	0.19	0.52	0.37	0.92	82	17
2021-10-05-21-22-02	2021	10	5	21	22	2.9	35.1971	25.3053	7.46	1.9	3	6	0.12	0.51	0.33	1.08	119	11
2021-10-05-21-26-30	2021	10	5	21	26	30.02	35.162	25.2623	7.41	1.3	2	6.22	0.21	0.44	0.33	1.35	76	12
2021-10-05-21-39-42	2021	10	5	21	39	42.7	35.1514	25.2276	11.4	1.8	4	7.97	0.1	0.57	0.37	1	84	11
2021-10-05-21-54-45	2021	10	5	21	54	46.72	35.1379	25.2338	8.91	2.3	4	6.41	0.11	0.58	0.36	1.21	127	11
2021-10-05-21-59-21	2021	10	5	21	59	20.68	35.1354	25.2317	8.78	2.9	4	6.32	0.11	0.4	0.25	0.57	77	28
2021-10-05-22-03-58	2021	10	5	22	3	58.92	35.1377	25.2323	9.02	2.2	4	6.35	0.13	0.33	0.22	0.9	76	18
2021-10-05-22-11-32	2021	10	5	22	11	31.84	35.1981	25.3077	7.32	1.8	3	5.95	0.07	0.37	0.36	1.05	109	13
2021-10-05-22-48-14	2021	10	5	22	48	13.94	35.1918	25.309	7.26	2.2	3	5.87	0.14	0.48	0.36	1.43	116	14
2021-10-05-22-52-47	2021	10	5	22	52	47.7	35.1374	25.2339	8.69	1.8	4	7.09	0.11	0.51	0.39	0.91	78	12
2021-10-05-22-54-20	2021	10	5	22	54	19.98	35.1378	25.2318	8.77	2.4	4	6.49	0.1	0.35	0.23	0.8	75	24
2021-10-05-22-59-27	2021	10	5	22	59	27.44	35.1774	25.3003	7.01	1.2	3	5.32	0.14	0.37	0.37	0.94	110	11
2021-10-05-23-05-07	2021	10	5	23	5	7.22	35.1368	25.2369	9.47	2.1	4	6.64	0.1	0.39	0.26	0.72	73	17
2021-10-05-23-09-38	2021	10	5	23	9	38.82	35.1834	25.2974	8.87	1.6	3	5.8	0.14	0.46	0.36	0.86	110	12
2021-10-05-23-29-44	2021	10	5	23	29	44.56	35.1816	25.2956	8.88	1.5	3	5.23	0.15	0.42	0.6	1.21	117	11
2021-10-06-00-03-24	2021	10	6	0	4	11.4	35.1397	25.2317	8.77	2	4	6.28	0.07	0.43	0.35	0.92	73	15
2021-10-06-00-08-50	2021	10	6	0	9	44.98	35.194	25.3059	7.2	1.7	3	5.5	0.14	0.4	0.27	0.94	113	15
2021-10-06-00-15-45	2021	10	6	0	15	44.74	35.1382	25.2359	8.94	2.3	4	6.39	0.09	0.37	0.25	0.93	78	21
2021-10-06-00-25-43	2021	10	6	0	25	43.6	35.1369	25.2342	9.23	1.7	4	6.71	0.12	0.6	0.39	0.98	81	11
2021-10-06-00-42-58	2021	10	6	0	42	58.51	35.1365	25.2332	8.84	2.1	4	6.62	0.1	0.41	0.28	0.72	73	17
2021-10-06-00-50-59	2021	10	6	0	50	59.4	35.1961	25.3051	6.91	1.8	3	5.74	0.15	0.48	0.38	1.14	120	11
2021-10-06-00-51-48	2021	10	6	0	51	48.91	35.194	25.3159	5.4	1.6	3	6.12	0.16	0.52	0.39	0.36	119	11
2021-10-06-01-11-25	2021	10	6	1	11	25.42	35.1964	25.3056	7.8	1.9	3	5.81	0.14	0.43	0.31	0.95	112	15
2021-10-06-01-15-42	2021	10	6	1	15	41.28	35.2035	25.3015	7.65	2.8	3	4.97	0.14	0.44	0.27	0.88	123	41
2021-10-06-01-58-52	2021	10	6	1	58	52.41	35.1858	25.2982	8.71	1.4	3	5.53	0.12	0.45	0.32	0.81	104	11
2021-10-06-02-03-06	2021	10	6	2	3	16.36	35.1189	25.2356	8.25	2.2	4	5.46	0.13	0.4	0.27	0.66	79	18
2021-10-06-02-25-34	2021	10	6	2	25	33.69	35.1961	25.3076	7.16	2.6	3	6.28	0.14	0.39	0.24	1.12	119	31
2021-10-06-02-57-31	2021	10	6	2	57	31.45	35.1348	25.2231	10.98	2.2	4	6.57	0.11	0.34	0.24	0.66	83	17
2021-10-06-03-14-59	2021	10	6	3	15	19.1	35.1915	25.3068	7.37	1.9	3	5.92	0.1	0.46	0.32	0.42	116	11
2021-10-06-03-41-13	2021	10	6	3	41	13.53	35.1633	25.3296	8.84	2.2	3	3.01	0.14	0.35	0.26	0.56	108	18
2021-10-06-03-42-23	2021	10	6	3	42	23.51	35.1947	25.3035	7.24	2.2	3	6.94	0.11	0.44	0.33	0.73	114	13
2021-10-06-03-52-12	2021	10	6	3	52	52.19	35.1936	25.3038	7.73	1.7	3	5.23	0.19	0.53	0.37	1.3	110	11
2021-10-06-04-20-49	2021	10	6	4	20	49.41	35.1464	25.2315	10.61	1.4	4	7.8	0.13	0.65	0.46	1.08	86	11
2021-10-06-04-24-07	2021	10	6	4	24	6.32	35.1339	25.231	8.83	3.1	4	6.58	0.12	0.41	0.26	0.56	74	22
2021-10-06-04-52-26	2021	10	6	4	52	25.62	35.1936	25.3074	8.09	3.2	3	6.12	0.15	0.38	0.25	0.88	110	30
2021-10-06-04-59-17	2021	10	6	4	59	18.02	35.1446	25.232	10.15	2	4	7.94	0.12	0.45	0.35	0.77	77	14
2021-10-06-05-13-41	2021	10	6	5	14	30.56	35.1347	25.2282	9.31	1.6	4	5.15	0.1	0.51	0.35	0.82	77	11
2021-10-06-05-19-31	2021	10	6	5	19	31.21	35.1372	25.2348	8.99	2.6	4	6.82	0.09	0.35	0.24	0.84	76	17
2021-10-06-05-43-13	2021	10	6	5	43	57.46	35.1961	25.3054	7.39	2.3	3	6.08	0.06	0.44	0.31	0.94	173	11
2021-10-06-05-53-25	2021	10	6	5	53	25.08	35.1282	25.2487	7.76	1.4	4	6.01	0.09	0.45	0.32	0.72	76	11
2021-10-06-06-03-27	2021	10	6	6	3	51.87	35.1959	25.3056	7.6	2	3	5.35	0.18	0.51	0.34	1.19	111	12
2021-10-06-06-18-54	2021	10	6	6	18	55.54	35.1373	25.2274	10.59	3	4	6.29	0.13	0.41	0.28	0.7	86	25
2021-10-06-07-28-57	2021	10	6	7	29	46.57	35.1292	25.2429	8.09	1.4	4	6.55	0.09	0.56	0.36	1.34	95	11
2021-10-06-07-36-36	2021	10	6	7	37	0.18	35.1967	25.3065	7.77	1.5	3	5.67	0.17	0.47	0.36	0.42	113	11
2021-10-06-08-04-41	2021	10	6	8	4	39.85	35.1415	25.2285	11.72	2.1	4	6.17	0.08	0.43	0.31	0.79	82	15
2021-10-06-08-24-04	2021	10	6	8	24	15.52	35.1966	25.3055	7.51	2.4	3	5.86	0.13	0.42	0.26	0.84	113	15
2021-10-06-09-06-25	2021	10	6	9	6	25.18	35.1727	25.2999	8.33	1.3	3	4.07	0.09	0.56	0.71	1.03	138	12
2021-10-06-09-10-22	2021	10	6	9	11	43.41	35.2035	25.3028	6.87	2.3	3	5.05	0.14	0.42	0.27	1.05	124	13
2021-10-06-09-36-16	2021	10	6	9	36	45.62	35.1933	25.3048	7.21	1.6	3	6.85	0.1	0.58	0.66	1.15	188	11
2021-10-06-10-23-25	2021	10	6	10	24	16.78	35.1914	25.308	6.08	2.1	3	6	0.11	0.38	0.28	1.08	115	12
2021-10-06-10-34-29	2021	10	6	10	34	58.83	35.1362	25.2286	9.12	2.7	4	6.08	0.08	0.49	0.39	0.89	96	11
2021-10-06-11-08-03	2021	10	6	11	8	2.67	35.1368	25.2313	9.38	2.7	4	6.65	0.11	0.41	0.26	0.55	87	20
2021-10-06-11-10-52	2021	10	6	11	10	51.89	35.1366	25.2286	9.59	2	4	6.86	0.12	0.4	0.31	0.8	82	12
2021-10-06-11-15-20	2021	10	6	11	15	19.91	35.1458	25.2292	10.21	2.6	4	8.2	0.11	0.37	0.27	0.78	76	24
2021-10-06-11-17-03	2021	10	6	11	17	3.86	35.1484	25.2364	10.19	2.6	4	8.02	0.12	0.35	0.25	0.72	67	19
2021-10-06-11-51-38	2021	10	6	11	52	8	35.1332	25.2275	9.06	1.4	4	6.84	0.09	0.57	0.37	0.94	85	11
2021-10-06-12-14-27	2021	10	6	12	14	49.13	35.134	25.2716	5.94	1.8	4	4.89	0.08	0.36	0.28	0.36	86	11
2021-10-06-12-25-47	2021	10	6	12	25	46.57	35.1197	25.2379	7.66	2	4	4.77	0.14	0.37	0.25	1.08	75	17
2021-10-06-12-40-57	2021	10	6	12	40	56.39	35.199	25.3148	7.94	1.1	3	7.22	0.13	0.4	0.37	0.34	126	12
2021-10-06-12-41-58	2021	10	6	12	41	58.71	35.1345	25.2288	9.48	2.1	4	6.56	0.14	0.38	0.26	0.86	83	20
2021-10-06-12-53-44	2021	10	6	12	53	44.06	35.1507	25.2341	11.18	2.7	4	8.37	0.13	0.45	0.32	0.84	75	16
2021-10-06-13-17-23	2021	10	6	13	17	22.39	35.1514	25.2299	11.44	3.1	4	8.29	0.12	0.35	0.22	0.63	72	56
2021-10-06-13-22-25	2021	10	6	13	22	26.18	35.1353	25.2247	10.73	2.3	4	5.86	0.1	0.4	0.26	0.76	92	29
2021-10-06-13-25-58	2021	10	6	13	25	57.66	35.1508	25.2304	11.22	2.2	4	8.17	0.12	0.56	0.4	1.01	72	11
2021-10-06-14-07-50	2021	10	6	14	7	50.08	35.1494	25.2297	10.24	2.2	4	7.59	0.15	0.4	0.28	0.77	78	23
2021-10-06-14-24-00	2021	10	6	14	24	0.0100021	35.1478	25.2304	10.47	2.6	4	7.75	0.11	0.39	0.24	0.73	78	50
2021-10-06-14-28-56	2021	10	6	14	29	10.37	35.1385	25.232	9.23	2.1	4	6.89	0.09	0.4	0.26	0.66	75	16
2021-10-06-14-46-51	2021	10	6	14	46	50.89	35.1967	25.3054	7.33	2.5	3	6.7	0.16	0.42	0.26	1.22	124	38
2021-10-06-14-49-08	2021	10	6	14	49	7.73	35.1359	25.2293	9.3	2.7	4	6.63	0.11	0.35	0.25	0.67	82	23
2021-10-06-15-16-58	2021	10	6	15	16	58.21	35.1909	25.3006	6.72	1.8	3	6.6	0.17	0.47	0.33	0.98	124	19
2021-10-06-15-27-33	2021	10	6	15	27	33.11	35.1363	25.2282	9.37	2.1	4	6.58	0.12	0.36	0.27	0.93	82	27
2021-10-06-15-28-46	2021	10	6	15	28	45.94	35.1486	25.2305	10.9	1.5	4	8	0.27	0.58	0.46	1.1	78	14
2021-10-06-15-30-03	2021	10	6	15	30	3.14	35.1315	25.2296	8.61	1.4	4	6.89	0.16	0.52	0.34	0.86	80	11
2021-10-06-15-36-01	2021	10	6	15	36	0.910004	35.1306	25.2398	7.37	1.9	4	5.97	0.12	0.46	0.4	1.3	71	11
2021-10-06-15-53-05	2021	10	6	15	53	24.42	35.1396	25.2306	10.01	1.7	4	6.86	0.13	0.48	0.33	0.84	81	11
2021-10-06-16-03-46	2021	10	6	16	4	3.88	35.1303	25.2328	8.05	1.6	4	9.06	0.07	1.08	0.43	1.8	176	11
2021-10-06-16-06-46	2021	10	6	16	6	45.49	35.1513	25.2291	11.2	3.3	4	7.59	0.12	0.42	0.28	0.78	67	72
2021-10-06-16-27-03	2021	10	6	16	28	15.17	35.1848	25.3041	8.14	1.9	3	4.73	0.06	0.68	0.69	1.01	188	11
2021-10-06-16-38-02	2021	10	6	16	38	3.57	35.1379	25.2285	8.84	2.5	4	7.58	0.16	0.39	0.27	0.72	77	38
2021-10-06-16-45-03	2021	10	6	16	45	2.8	35.1964	25.3061	7.3	2.8	3	6.27	0.15	0.38	0.24	0.88	117	32
2021-10-06-16-52-04	2021	10	6	16	52	4.58	35.1882	25.3073	6.92	1.3	3	5.88	0.14	0.48	0.53	1.06	177	12
2021-10-06-17-02-26	2021	10	6	17	2	26.2	35.1963	25.3063	7.87	1.8	3	5.69	0.11	0.35	0.27	0.84	114	23
2021-10-06-17-05-21	2021	10	6	17	5	21.12	35.1379	25.2295	9	2.7	4	6.11	0.1	0.31	0.23	0.65	76	52
2021-10-06-17-18-52	2021	10	6	17	18	52.76	35.1642	25.3339	9.54	1.6	3	2.2	0.14	0.58	0.35	0.69	94	14
2021-10-06-17-24-23	2021	10	6	17	24	23.56	35.1367	25.2316	9.62	2	4	6.14	0.2	0.43	0.3	0.74	89	26
2021-10-06-17-24-58	2021	10	6	17	24	58	35.137	25.2311	9.31	3	4	6.35	0.11	0.34	0.25	0.73	81	25
2021-10-06-17-28-02	2021	10	6	17	28	2.88	35.1363	25.2285	9.36	1.9	4	6.05	0.13	0.34	0.26	0.81	85	17
2021-10-06-17-46-24	2021	10	6	17	46	24.88	35.1346	25.2296	9.28	2.1	4	7.23	0.11	0.32	0.23	0.66	76	28
2021-10-06-18-14-32	2021	10	6	18	14	37.98	35.1458	25.247	7.92	1.7	2	7.6	0.16	0.61	0.39	3.54	136	11
2021-10-06-19-01-05	2021	10	6	19	1	5.8	35.1399	25.2282	9.23	2	4	6.38	0.1	0.51	0.35	0.84	78	19
2021-10-06-19-14-59	2021	10	6	19	14	59.78	35.1371	25.2299	9.11	1.8	4	5.41	0.13	0.55	0.33	0.86	89	15
2021-10-06-19-37-54	2021	10	6	19	37	53.82	35.1834	25.2994	8.08	2.3	3	4.97	0.11	0.39	0.28	0.77	112	23
2021-10-06-19-47-51	2021	10	6	19	47	51.54	35.1495	25.225	9.38	1.9	4	7.81	0.11	0.46	0.36	0.72	80	14
2021-10-06-20-01-11	2021	10	6	20	1	11.42	35.1367	25.2237	11.03	1.6	4	7.11	0.13	0.65	0.49	0.9	79	18
2021-10-06-20-10-07	2021	10	6	20	10	7.36	35.2042	25.3186	6.51	2	3	8.04	0.11	0.33	0.45	0.28	131	18
2021-10-06-20-13-02	2021	10	6	20	13	2.36	35.1451	25.2328	9.94	1.4	4	6.84	0.14	0.56	0.36	0.89	79	11
2021-10-06-20-27-47	2021	10	6	20	27	47.08	35.1931	25.304	7.5	1.8	3	6.13	0.1	0.43	0.28	0.79	112	18
2021-10-06-20-30-45	2021	10	6	20	30	45.96	35.1901	25.3032	7.18	1.6	3	6.03	0.12	0.52	0.47	1.2	184	11
2021-10-06-20-58-26	2021	10	6	20	58	26.4	35.1294	25.2472	8.04	0.9	4	6.62	0.14	0.58	0.45	1.31	93	12
2021-10-06-21-00-44	2021	10	6	21	0	44.58	35.139	25.2246	11.32	1.7	4	6.66	0.15	0.65	0.41	0.77	87	16
2021-10-06-21-07-21	2021	10	6	21	7	21.44	35.1926	25.2996	7.61	1.1	3	6.98	0.08	0.6	0.78	1.56	189	11
2021-10-06-21-15-27	2021	10	6	21	15	27.48	35.1919	25.3082	6.05	1.4	3	7.1	0.1	0.44	0.35	0.32	125	12
2021-10-06-21-21-43	2021	10	6	21	21	44.28	35.1715	25.2313	8.52	1.4	2	5.75	0.12	0.45	0.38	0.99	72	15
2021-10-06-21-35-57	2021	10	6	21	35	56.66	35.1975	25.3048	7.61	2.4	3	5.95	0.11	0.37	0.25	0.81	119	32
2021-10-06-22-28-14	2021	10	6	22	28	14.02	35.1968	25.3056	6.47	1.3	3	6.43	0.12	0.54	0.36	1.14	125	11
2021-10-06-22-35-22	2021	10	6	22	35	21.36	35.1946	25.3143	6.11	2.3	3	5.82	0.09	0.33	0.24	0.82	116	29
2021-10-06-22-46-40	2021	10	6	22	46	40.74	35.2036	25.3119	6.58	1.6	3	13.09	0.12	0.53	0.32	1.98	113	20
2021-10-06-22-56-47	2021	10	6	22	56	47.24	35.1991	25.3096	6.34	1.6	3	7.69	0.21	0.7	0.45	1.51	134	13
2021-10-06-23-05-44	2021	10	6	23	5	44.4	35.148	25.2313	10.67	1.7	4	8.2	0.12	0.45	0.34	0.93	69	14
2021-10-06-23-27-25	2021	10	6	23	27	26.28	35.1726	25.2979	8.06	1.3	3	4.17	0.09	0.47	0.34	0.59	119	12
2021-10-06-23-38-12	2021	10	6	23	38	58.44	35.2416	25.2815	4.6	1.8	3	2.24	0.18	0.5	0.29	0.46	129	14
2021-10-06-23-45-19	2021	10	6	23	45	19.6	35.1937	25.3033	7	1.1	3	5.49	0.2	0.7	0.64	1.32	178	11
2021-10-07-00-17-58	2021	10	7	0	17	58.82	35.2029	25.3125	6.52	1.8	3	5.66	0.11	0.44	0.38	0.76	121	17
2021-10-07-00-28-55	2021	10	7	0	29	41.81	35.1223	25.2433	8.45	1.5	4	6	0.12	0.46	0.34	1.01	70	12
2021-10-07-00-54-24	2021	10	7	0	55	12.81	35.1983	25.3039	7.28	2.7	3	5.68	0.1	0.38	0.27	0.66	120	35
2021-10-07-01-01-10	2021	10	7	1	1	9.9	35.152	25.203	8.58	2.2	4	9.03	0.12	0.43	0.31	1	86	23
2021-10-07-01-11-50	2021	10	7	1	11	50.16	35.1992	25.307	7.37	1.9	3	5.51	0.12	0.44	0.3	0.91	117	25
2021-10-07-01-39-06	2021	10	7	1	39	6.83	35.1491	25.2258	9.79	2.4	4	7.65	0.1	0.31	0.22	0.81	79	27
2021-10-07-01-42-43	2021	10	7	1	42	42.93	35.1714	25.2955	7.85	2.1	3	4.42	0.09	0.45	0.28	0.71	101	20
2021-10-07-01-56-20	2021	10	7	1	56	21.33	35.1787	25.2915	8.26	1.5	3	5.91	0.12	0.48	0.44	0.96	166	12
2021-10-07-02-04-10	2021	10	7	2	4	10.8	35.1942	25.2993	7.54	1.9	3	6.72	0.08	0.34	0.28	0.64	127	29
2021-10-07-02-26-59	2021	10	7	2	26	58.96	35.1949	25.3159	7.11	2.2	3	6.2	0.1	0.36	0.25	0.65	121	25
2021-10-07-02-34-19	2021	10	7	2	34	19.89	35.1953	25.3028	7.07	1.3	3	5.17	0.11	0.38	0.37	0.64	114	16
2021-10-07-02-46-11	2021	10	7	2	46	14.08	35.1338	25.2263	9.71	1.8	4	8.61	0.07	0.75	0.38	1.48	183	11
2021-10-07-02-58-11	2021	10	7	2	58	10.9	35.1389	25.2208	11.65	2.4	4	6.66	0.12	0.47	0.31	0.75	84	29
2021-10-07-03-00-27	2021	10	7	3	0	59.12	35.1866	25.3169	8.04	1.7	3	5.39	0.13	0.46	0.32	1.2	118	11
2021-10-07-03-11-26	2021	10	7	3	11	26.36	35.1352	25.2256	9.1	1.1	4	7.26	0.08	0.51	0.35	0.96	85	12
2021-10-07-03-18-01	2021	10	7	3	18	23	35.1734	25.2971	7.69	1.4	3	4.25	0.1	0.49	0.34	0.92	103	11
2021-10-07-04-06-48	2021	10	7	4	7	51.74	35.1334	25.2258	9.03	1.8	4	6.05	0.08	0.47	0.34	0.94	80	11
2021-10-07-04-14-10	2021	10	7	4	15	19.22	35.1561	25.2404	10.51	2	2	7.9	0.14	0.37	0.24	0.71	69	20
2021-10-07-04-16-42	2021	10	7	4	16	42.32	35.1994	25.2792	8.15	1.4	2	4	0.31	0.63	0.58	1.67	123	12
2021-10-07-04-17-46	2021	10	7	4	17	47.02	35.1578	25.2261	11.91	1.4	2	8.07	0.28	0.66	0.49	1.11	73	11
2021-10-07-04-58-39	2021	10	7	4	58	39.57	35.1385	25.2297	9.31	1.5	4	5.82	0.19	0.73	0.42	0.99	91	11
2021-10-07-05-02-05	2021	10	7	5	2	4.98	35.1954	25.3065	7.57	2.3	3	6.97	0.15	0.4	0.31	0.42	123	19
2021-10-07-05-06-59	2021	10	7	5	6	57.9	35.2058	25.322	6.43	2.8	3	7.4	0.11	0.48	0.3	1.15	129	38
2021-10-07-06-10-19	2021	10	7	6	10	19.3	35.1854	25.3023	8.55	3.2	3	5.57	0.14	0.39	0.24	0.74	111	62
2021-10-07-06-26-00	2021	10	7	6	25	59.97	35.1958	25.3062	7.28	2.2	3	5.52	0.14	0.46	0.33	0.78	110	19
2021-10-07-06-37-08	2021	10	7	6	37	8.66	35.1221	25.2469	7.82	1.9	4	5.8	0.11	0.46	0.34	1	78	11
2021-10-07-06-41-20	2021	10	7	6	41	20	35.1892	25.2508	9.22	2.1	2	4.58	0.17	0.37	0.25	0.66	75	24
2021-10-07-06-59-02	2021	10	7	6	59	2.88	35.1363	25.2347	9.87	2	4	7.09	0.12	0.48	0.36	0.82	69	11
2021-10-07-07-02-12	2021	10	7	7	2	27.31	35.199	25.3079	7.31	2.5	3	4.85	0.35	0.59	0.39	1.37	117	20
2021-10-07-07-09-13	2021	10	7	7	9	13	35.1986	25.3064	7.73	2	3	5.31	0.28	0.53	0.37	0.92	124	21
2021-10-07-07-13-31	2021	10	7	7	14	3.26	35.1661	25.2452	11.17	1.9	2	6.04	0.11	0.47	0.35	1.03	116	11
2021-10-07-07-45-34	2021	10	7	7	45	33.94	35.1371	25.2373	9.51	1.9	4	6.81	0.08	0.49	0.31	0.7	72	11
2021-10-07-08-12-22	2021	10	7	8	12	21.5	35.1495	25.2296	10.91	2.7	4	8	0.14	0.41	0.28	0.83	70	33
2021-10-07-08-22-19	2021	10	7	8	22	24.21	35.1962	25.309	6.77	1.9	3	5.86	0.07	0.34	0.26	1.03	111	11
2021-10-07-08-23-12	2021	10	7	8	23	12.62	35.138	25.1961	7.43	2.4	4	5.25	0.07	0.33	0.25	0.62	108	21
2021-10-07-08-42-39	2021	10	7	8	42	38.35	35.1407	25.1965	9.2	2.5	4	8.05	0.17	0.41	0.32	1	103	21
2021-10-07-09-10-18	2021	10	7	9	10	17.81	35.1515	25.2308	11.33	2	4	8.03	0.14	0.67	0.44	1.35	83	12
2021-10-07-09-16-00	2021	10	7	9	16	0.480003	35.1352	25.2285	9.38	2	4	6.81	0.11	0.41	0.31	0.87	86	14
2021-10-07-09-38-35	2021	10	7	9	38	52.87	35.1975	25.3074	7.2	1.7	3	6.18	0.16	0.44	0.29	1.3	119	11
2021-10-07-09-49-27	2021	10	7	9	49	27.42	35.1315	25.246	8.4	1.8	4	6.29	0.26	0.81	0.68	1.11	84	14
2021-10-07-10-15-57	2021	10	7	10	15	57.78	35.1967	25.3076	7.15	1.5	3	6.15	0.11	0.5	0.35	1.27	118	11
2021-10-07-10-26-55	2021	10	7	10	27	48.89	35.2022	25.3175	6.63	1.4	3	6.78	0.16	0.45	0.33	0.38	124	11
2021-10-07-11-10-56	2021	10	7	11	12	20.32	35.1609	25.264	9.57	2.3	2	6.45	0.13	0.34	0.25	0.65	81	27
2021-10-07-11-11-10	2021	10	7	11	11	10.16	35.1379	25.2269	8.86	1.7	4	7.53	0.16	0.45	0.33	0.79	83	12
2021-10-07-11-44-06	2021	10	7	11	44	42.61	35.1958	25.3076	7.71	2.4	3	5.79	0.16	0.41	0.27	1.05	116	27
2021-10-07-12-00-33	2021	10	7	12	0	41.93	35.1879	25.2988	8.29	1.8	3	6.48	0.08	0.54	0.4	1.41	170	11
2021-10-07-12-02-49	2021	10	7	12	3	36.21	35.1936	25.3155	6.12	2.2	3	6.17	0.11	0.38	0.25	0.36	118	13
2021-10-07-12-11-05	2021	10	7	12	11	39.21	35.1873	25.2495	9.39	2.1	2	4.46	0.12	0.38	0.23	0.58	74	26
2021-10-07-12-19-33	2021	10	7	12	19	33.39	35.1358	25.243	8.47	2.9	4	6.96	0.11	0.37	0.26	0.73	67	33
2021-10-07-12-29-57	2021	10	7	12	29	59.76	35.194	25.3138	6.06	1.8	3	5.8	0.12	0.43	0.27	0.4	116	12
2021-10-07-13-10-07	2021	10	7	13	10	35.34	35.1909	25.2546	10.14	1.6	2	4.81	0.12	0.53	0.42	0.82	80	11
2021-10-07-13-41-33	2021	10	7	13	42	3.07	35.1939	25.307	6.87	1.4	3	7.5	0.07	0.59	0.92	0.56	197	11
2021-10-07-14-25-42	2021	10	7	14	25	42.71	35.1381	25.2332	9.03	0.7	4	7.14	0.13	0.59	0.38	0.95	106	11
2021-10-07-14-28-20	2021	10	7	14	28	19.47	35.144	25.2308	9.82	2.7	4	7.4	0.1	0.33	0.23	0.64	79	39
2021-10-07-14-33-30	2021	10	7	14	33	29.38	35.1964	25.309	7.52	2.4	3	6.24	0.12	0.34	0.21	0.31	115	26
2021-10-07-15-15-30	2021	10	7	15	16	0.0500031	35.1958	25.3089	7.01	1.5	3	6.3	0.14	0.51	0.31	0.46	117	11
2021-10-07-16-12-50	2021	10	7	16	12	50.28	35.198	25.3054	7.79	2	3	6.33	0.14	0.53	0.35	1.34	119	12
2021-10-07-16-16-17	2021	10	7	16	17	12.53	35.135	25.2285	9.56	1.6	4	6.96	0.11	0.61	0.39	1.02	84	11
2021-10-07-16-30-22	2021	10	7	16	30	23.05	35.198	25.3152	7.1	1.6	3	6.24	0.13	0.49	0.34	1.23	115	11
2021-10-07-16-59-48	2021	10	7	16	59	48.21	35.1967	25.3071	7.06	2.9	3	6.4	0.14	0.32	0.21	0.29	117	33
2021-10-07-17-20-19	2021	10	7	17	20	18.72	35.1405	25.2317	9.04	1.6	4	6.3	0.1	0.56	0.37	1.08	125	11
2021-10-07-17-24-31	2021	10	7	17	24	31.82	35.1871	25.247	9.4	1	2	5.18	0.16	0.48	0.4	1.2	116	11
2021-10-07-17-25-18	2021	10	7	17	25	50.22	35.1808	25.2729	9.92	1.6	2	5.98	0.11	0.39	0.28	0.76	88	16
2021-10-07-17-50-27	2021	10	7	17	50	27.78	35.1841	25.2438	8.68	2.2	2	5.48	0.14	0.33	0.23	0.71	66	37
2021-10-07-17-52-08	2021	10	7	17	52	8.04	35.1843	25.312	6.33	1.3	3	5.22	0.12	0.33	0.29	0.85	109	16
2021-10-07-18-39-09	2021	10	7	18	39	9.86	35.1945	25.3043	6.9	1.7	3	6.17	0.11	0.62	0.61	1.12	180	11
2021-10-07-18-43-04	2021	10	7	18	43	5.96	35.1897	25.2472	9.23	1.7	2	4.62	0.1	0.46	0.54	1.25	122	11
2021-10-07-18-49-05	2021	10	7	18	49	5.72	35.1385	25.2247	11.28	1.6	4	6.7	0.11	0.51	0.35	1.05	86	11
2021-10-07-18-49-34	2021	10	7	18	49	34.4	35.1396	25.2241	8.35	1.6	4	7.43	0.2	0.51	0.37	0.89	81	11
2021-10-07-18-52-26	2021	10	7	18	53	37.48	35.1882	25.3123	6.14	2.5	3	5.46	0.12	0.34	0.23	0.32	115	39
2021-10-07-19-04-56	2021	10	7	19	4	55.84	35.2258	25.3658	6.63	1.1	3	11.21	0.25	0.54	0.4	1.23	148	11
2021-10-07-19-07-48	2021	10	7	19	7	48.04	35.1886	25.2976	8.35	2.6	3	5.73	0.12	0.36	0.24	0.64	103	43
2021-10-07-20-08-44	2021	10	7	20	8	43.24	35.1986	25.3137	6.84	2.4	3	6.3	0.15	0.41	0.25	0.88	118	43
2021-10-07-20-17-21	2021	10	7	20	18	4.36	35.1963	25.3092	6.99	2.3	3	6.23	0.11	0.37	0.24	0.35	116	15
2021-10-07-20-21-50	2021	10	7	20	21	50.02	35.195	25.3085	7.8	1.8	3	5.82	0.14	0.45	0.31	0.74	127	24
2021-10-07-20-28-25	2021	10	7	20	28	25.72	35.1945	25.3107	7	1.6	3	6.57	0.12	0.38	0.25	0.76	121	22
2021-10-07-20-42-54	2021	10	7	20	42	55.08	35.1924	25.3027	7.49	1.5	3	5.01	0.14	0.41	0.27	0.59	102	27
2021-10-07-20-55-55	2021	10	7	20	56	49.76	35.1362	25.2164	11	1	4	6.76	0.1	0.52	0.39	1.04	90	11
2021-10-07-21-07-01	2021	10	7	21	7	40.32	35.1975	25.3096	7.71	1.5	3	6.48	0.11	0.4	0.28	0.97	120	13
2021-10-07-21-29-03	2021	10	7	21	29	2.92	35.1895	25.3138	7.62	1	3	5.84	0.13	0.37	0.26	0.88	119	14
2021-10-07-21-34-15	2021	10	7	21	34	16.84	35.1677	25.2591	10.23	2.6	2	6.82	0.11	0.34	0.22	0.61	81	49
2021-10-07-22-23-39	2021	10	7	22	23	38.36	35.2002	25.3071	7.61	2.1	3	5.95	0.19	0.37	0.25	0.84	115	33
2021-10-07-22-28-25	2021	10	7	22	28	26.24	35.1978	25.3066	7.44	2.5	3	5.17	0.12	0.3	0.22	0.83	114	43
2021-10-07-22-37-58	2021	10	7	22	37	58.24	35.13	25.233	9.42	1.5	4	7.12	0.14	0.36	0.27	0.67	78	18
2021-10-07-22-59-21	2021	10	7	23	0	9.06	35.1447	25.2268	8.86	1.8	4	7.48	0.09	0.41	0.32	0.94	111	15
2021-10-07-23-19-15	2021	10	7	23	19	14.76	35.1544	25.2303	10.87	1.6	2	8.11	0.12	0.6	0.45	1.11	96	11
2021-10-07-23-20-35	2021	10	7	23	20	35.66	35.1956	25.308	7.1	1.2	3	5.91	0.16	0.4	0.26	0.88	117	16
2021-10-07-23-28-38	2021	10	7	23	28	38.12	35.1986	25.3111	6.33	0.9	3	6.17	0.16	0.42	0.3	0.75	116	13
2021-10-07-23-29-04	2021	10	7	23	29	4.64	35.1948	25.3025	8.28	0.9	3	6.98	0.11	0.43	0.27	0.74	133	16
2021-10-07-23-49-45	2021	10	7	23	49	44.96	35.1833	25.2684	10.54	0.7	2	5.8	0.23	0.54	0.42	0.98	88	13
2021-10-07-23-52-49	2021	10	7	23	52	50.32	35.14	25.2303	9.64	1.1	4	7.47	0.11	0.48	0.34	0.88	83	11
2021-10-07-23-58-43	2021	10	7	23	58	43.9	35.1612	25.2414	10.04	1.1	2	7.55	0.14	0.4	0.3	0.72	68	18
2021-10-08-00-09-24	2021	10	8	0	9	23.99	35.1235	25.2688	5.29	2.3	4	5.52	0.12	0.3	0.22	0.28	87	38
2021-10-08-00-21-00	2021	10	8	0	20	59.97	35.1227	25.2415	7.87	1.8	4	5.76	0.13	0.35	0.24	0.76	76	26
2021-10-08-01-11-40	2021	10	8	1	11	41.97	35.1351	25.2602	7.64	1.5	4	6.16	0.11	0.31	0.22	0.71	76	23
2021-10-08-01-13-13	2021	10	8	1	13	13.25	35.1364	25.2568	8.59	0.8	4	6.52	0.09	0.42	0.31	0.76	69	12
2021-10-08-01-42-33	2021	10	8	1	42	33.67	35.1964	25.3052	7.3	1.8	3	6.51	0.18	0.43	0.26	0.82	121	31
2021-10-08-02-41-08	2021	10	8	2	41	8.77	35.1973	25.3094	7.72	1.1	3	5.59	0.12	0.38	0.28	0.91	119	15
2021-10-08-02-43-30	2021	10	8	2	44	7.62	35.1386	25.2263	8.2	1.3	4	7.34	0.12	0.5	0.29	0.81	73	16
2021-10-08-03-06-16	2021	10	8	3	6	15.74	35.2003	25.3129	7	2.3	3	6.43	0.16	0.36	0.25	0.81	119	36
2021-10-08-03-14-39	2021	10	8	3	14	38.35	35.1856	25.2948	9.01	2.2	3	5.65	0.13	0.4	0.24	0.67	104	34
2021-10-08-03-20-36	2021	10	8	3	20	36.32	35.1951	25.3057	6.88	2.2	3	5.91	0.11	0.35	0.24	0.92	115	32
2021-10-08-03-27-48	2021	10	8	3	27	48.03	35.1973	25.3062	7.78	2.2	3	6.15	0.12	0.38	0.23	1.04	115	32
2021-10-08-03-36-07	2021	10	8	3	36	10.11	35.1551	25.2251	11.15	2.9	4	8.17	0.15	0.38	0.26	0.64	75	40
2021-10-08-04-21-08	2021	10	8	4	21	7.59	35.1544	25.2309	11.61	2.3	4	8.28	0.14	0.36	0.26	0.64	75	34
2021-10-08-04-22-38	2021	10	8	4	22	38.71	35.1941	25.3061	6.75	1.7	3	5.97	0.17	0.33	0.24	0.32	115	18
2021-10-08-04-49-23	2021	10	8	4	49	45.24	35.1873	25.3133	6.15	2	3	5.81	0.13	0.4	0.25	1.04	116	20
2021-10-08-05-16-26	2021	10	8	5	16	26.7	35.1355	25.2298	9.2	1.9	4	8.01	0.13	0.36	0.24	0.6	76	24
2021-10-08-05-17-21	2021	10	8	5	17	52.07	35.196	25.3088	6.55	1.5	3	5.75	0.11	0.46	0.31	1.16	113	12
2021-10-08-05-24-43	2021	10	8	5	24	43.72	35.1955	25.3103	6.66	1.5	3	6.26	0.09	0.34	0.31	0.28	116	13
2021-10-08-05-34-03	2021	10	8	5	34	43.9	35.1528	25.2278	11.24	1.6	4	8.04	0.11	0.49	0.36	1.02	73	11
2021-10-08-05-53-20	2021	10	8	5	53	19.75	35.1443	25.2282	9.75	1.8	4	8.21	0.11	0.36	0.26	0.68	74	17
2021-10-08-06-22-36	2021	10	8	6	22	39.47	35.195	25.3066	7.25	1.4	3	5.82	0.32	0.75	0.48	1.33	116	11
2021-10-08-06-26-50	2021	10	8	6	26	50.68	35.1514	25.2329	10.62	3.6	4	8.19	0.11	0.4	0.26	0.64	73	90
2021-10-08-07-17-28	2021	10	8	7	18	12.96	35.1984	25.3082	7.52	1.4	3	6.63	0.06	0.57	0.73	1.35	189	11
2021-10-08-07-30-33	2021	10	8	7	31	33.24	35.1897	25.314	6.25	2.2	3	5.36	0.1	0.34	0.2	0.25	113	22
2021-10-08-07-45-16	2021	10	8	7	45	17.42	35.1511	25.2241	10.77	2.1	4	8.13	0.21	0.47	0.31	0.82	73	20
2021-10-08-08-52-25	2021	10	8	8	53	29.63	35.1596	25.2802	8.2	2	2	4.96	0.11	0.41	0.31	1.1	122	11
2021-10-08-08-57-17	2021	10	8	8	57	17.33	35.1597	25.2369	11	1.5	2	6.66	0.16	0.47	0.28	0.58	66	18
2021-10-08-09-35-18	2021	10	8	9	36	13.72	35.1877	25.3067	6.7	2	3	7.17	0.11	0.49	0.48	1.16	146	13
2021-10-08-09-38-28	2021	10	8	9	38	27.68	35.1478	25.2355	9.78	1.7	4	7.81	0.11	0.47	0.39	1.59	67	11
2021-10-08-09-48-18	2021	10	8	9	48	18.49	35.18	25.3203	7.55	2	3	4.79	0.18	0.34	0.27	0.41	115	19
2021-10-08-10-11-01	2021	10	8	10	11	1.69	35.144	25.2028	14.37	1.7	4	8.44	0.13	0.49	0.33	1.04	94	13
2021-10-08-10-13-22	2021	10	8	10	13	22.3	35.1993	25.3109	7.37	1.2	3	5.71	0.11	0.56	0.67	1.01	116	11
2021-10-08-10-16-44	2021	10	8	10	16	45.27	35.1557	25.2698	8.75	1.7	2	6.24	0.24	0.65	0.44	1.21	81	11
2021-10-08-11-10-27	2021	10	8	11	10	58.97	35.1951	25.305	7.28	1.5	3	5.45	0.15	0.53	0.38	1.28	115	11
2021-10-08-11-41-24	2021	10	8	11	41	24.94	35.1311	25.2319	8.39	1	4	7.24	0.15	0.7	0.43	1.2	97	11
2021-10-08-11-49-08	2021	10	8	11	49	52.44	35.1246	25.2448	8.15	1.3	4	5.93	0.11	0.58	0.39	1.19	81	11
2021-10-08-12-10-09	2021	10	8	12	10	10.84	35.1828	25.3095	6.36	2.1	3	5.88	0.21	0.49	0.37	0.37	114	18
2021-10-08-12-54-52	2021	10	8	12	54	52.95	35.1759	25.2564	8.3	1.6	2	4.48	0.16	0.59	0.42	0.95	92	12
2021-10-08-12-55-09	2021	10	8	12	55	8.78	35.1426	25.2353	9.36	2.7	4	7.05	0.08	0.47	0.43	0.94	83	13
2021-10-08-13-19-55	2021	10	8	13	19	56.15	35.1728	25.2694	8.29	1.3	2	4.19	0.38	0.82	0.8	1.81	167	11
2021-10-08-13-27-15	2021	10	8	13	27	15.48	35.194	25.3083	6.31	3.3	3	6.29	0.14	0.32	0.22	0.33	117	37
2021-10-08-13-38-06	2021	10	8	13	38	6.47	35.1572	25.2775	25.89	1.7	2	4.62	0.22	0.81	0.65	1.01	106	17
2021-10-08-13-38-07	2021	10	8	13	38	7.83	35.1838	25.3143	6.42	1.2	3	4.64	0.11	0.41	0.45	1.09	108	11
2021-10-08-14-10-20	2021	10	8	14	10	20.99	35.1974	25.3109	6.9	1.4	3	6.85	0.18	0.6	0.4	0.99	125	11
2021-10-08-14-12-18	2021	10	8	14	12	19.86	35.1405	25.2271	10.39	2.1	4	6.33	0.11	0.43	0.29	0.73	78	15
2021-10-08-14-16-14	2021	10	8	14	16	14.17	35.1955	25.3062	7.44	3.1	3	6.54	0.13	0.42	0.26	0.82	120	21
2021-10-08-14-33-46	2021	10	8	14	34	15.42	35.1605	25.2416	10.29	1.9	2	8.34	0.12	0.53	0.35	1.11	88	12
2021-10-08-14-57-46	2021	10	8	14	58	39.31	35.1843	25.3121	7.8	1.7	3	5.59	0.07	0.68	0.45	1.19	179	11
2021-10-08-15-24-35	2021	10	8	15	24	34.82	35.1865	25.3191	5.69	3.2	3	5.24	0.15	0.29	0.24	0.27	117	28
2021-10-08-16-05-16	2021	10	8	16	6	5.81	35.1839	25.2428	8.64	1.8	2	4.89	0.11	0.54	0.4	0.97	74	11
2021-10-08-16-07-49	2021	10	8	16	7	49.58	35.2002	25.3037	7.71	1.2	3	4.69	0.23	0.94	0.58	1.19	163	11
2021-10-08-16-34-42	2021	10	8	16	34	42.64	35.1212	25.2433	8.84	1.2	4	6.7	0.08	0.42	0.39	0.84	84	11
2021-10-08-16-47-45	2021	10	8	16	47	45.13	35.1984	25.3128	7.13	2.1	3	7.13	0.17	0.46	0.34	1.17	125	18
2021-10-08-16-49-20	2021	10	8	16	50	23.69	35.1959	25.3036	8.06	1.8	3	6.13	0.13	0.54	0.35	1.28	122	11
2021-10-08-17-19-13	2021	10	8	17	19	13.96	35.1234	25.2485	8.49	2.8	4	4.91	0.08	0.38	0.28	0.85	73	18
2021-10-08-17-50-02	2021	10	8	17	50	6.96	35.198	25.3075	7.86	1.5	3	6.28	0.1	0.55	0.57	1.15	192	11
2021-10-08-17-57-07	2021	10	8	17	57	7.16	35.1445	25.2648	8.62	1.5	4	6.01	0.18	0.48	0.37	0.71	75	12
2021-10-08-18-42-36	2021	10	8	18	42	36.32	35.1921	25.3147	6.24	2	3	5.04	0.09	0.32	0.21	0.3	110	19
2021-10-08-18-45-33	2021	10	8	18	45	33.76	35.1433	25.204	9.82	1.5	4	5.64	0.1	0.44	0.33	0.91	93	12
2021-10-08-18-59-37	2021	10	8	18	59	45.9	35.1269	25.2387	7.9	1.6	4	4.81	0.13	0.59	0.39	0.97	79	11
2021-10-08-19-09-54	2021	10	8	19	9	54.08	35.1833	25.3169	6.11	1.9	3	5.2	0.14	0.38	0.21	0.42	115	18
2021-10-08-19-22-35	2021	10	8	19	22	34.8	35.1172	25.2395	8.25	1	4	4.16	0.13	0.42	0.29	0.63	75	11
2021-10-08-20-28-01	2021	10	8	20	28	1.32	35.2002	25.3041	7.88	1.9	3	6.35	0.17	0.31	0.23	0.28	125	18
2021-10-08-20-41-21	2021	10	8	20	41	22.28	35.1956	25.3052	6.86	1.5	3	5.74	0.09	0.79	0.63	2.91	174	11
2021-10-08-20-56-46	2021	10	8	20	56	47.18	35.1268	25.247	8.04	0.7	4	5.28	0.13	0.64	0.46	1.41	119	11
2021-10-08-21-29-46	2021	10	8	21	29	45.9	35.1997	25.3101	7.58	1.5	3	6.5	0.12	0.51	0.33	1.11	119	12
2021-10-08-21-34-12	2021	10	8	21	34	13.54	35.1852	25.3012	7.85	1.5	3	5.16	0.13	0.43	0.41	0.94	105	13
2021-10-08-21-45-00	2021	10	8	21	45	0.239998	35.195	25.3029	7.3	2.5	3	7.95	0.16	0.43	0.3	1.1	131	31
2021-10-08-21-52-41	2021	10	8	21	52	41.48	35.1367	25.2512	7.17	1.3	4	7.1	0.1	0.44	0.35	0.85	67	11
2021-10-08-22-01-28	2021	10	8	22	1	28.16	35.1831	25.3009	8.71	2	3	5.66	0.12	0.37	0.26	0.64	111	24
2021-10-08-22-15-37	2021	10	8	22	15	36.72	35.141	25.2262	9.52	2.8	4	6.64	0.11	0.4	0.27	0.7	81	33
2021-10-08-22-19-23	2021	10	8	22	19	25.08	35.1914	25.3186	5.51	1.4	3	5.13	0.05	0.59	0.35	0.32	115	11
2021-10-08-22-32-31	2021	10	8	22	32	31.08	35.1384	25.2262	9.62	2.1	4	6.88	0.07	0.36	0.25	0.63	75	22
2021-10-08-22-51-22	2021	10	8	22	51	21.64	35.1943	25.3056	7.71	1.9	3	5.72	0.13	0.44	0.28	0.69	113	23
2021-10-08-23-19-58	2021	10	8	23	19	58.32	35.1714	25.2671	9.6	1.8	2	6.97	0.17	0.52	0.32	0.82	79	16
2021-10-08-23-23-50	2021	10	8	23	23	50.66	35.1948	25.3139	6.23	1.9	3	6.04	0.13	0.32	0.3	0.3	116	23
2021-10-08-23-39-04	2021	10	8	23	39	3.26	35.1983	25.3038	8.09	1.8	3	6.29	0.1	0.56	0.47	1.54	125	11
2021-10-08-23-52-30	2021	10	8	23	52	31.48	35.2118	25.3206	6.31	1.4	3	9.38	0.23	1.04	0.72	3.01	237	11
2021-10-09-00-10-15	2021	10	9	0	10	15.24	35.1768	25.2426	10.25	1.9	2	5.22	0.13	0.36	0.25	0.46	74	25
2021-10-09-00-17-08	2021	10	9	0	17	8.13	35.1745	25.3029	6.18	1.7	3	4.48	0.17	0.5	0.3	1.23	106	11
2021-10-09-01-00-20	2021	10	9	1	0	20.29	35.1131	25.2525	7.05	1.8	4	4.08	0.08	0.36	0.3	0.8	86	20
2021-10-09-01-42-31	2021	10	9	1	42	31.65	35.1392	25.2328	8.85	3	4	6.07	0.11	0.34	0.23	0.62	79	40
2021-10-09-01-46-10	2021	10	9	1	46	10.78	35.195	25.3254	4.79	2.7	3	9.25	0.1	0.31	0.19	0.27	111	30
2021-10-09-02-42-18	2021	10	9	2	42	18.55	35.1555	25.2383	10.67	1.3	2	7.22	0.11	0.52	0.41	0.89	73	15
2021-10-09-03-22-32	2021	10	9	3	22	32.83	35.2049	25.3129	7.82	2.5	3	6.87	0.11	0.43	0.31	0.85	123	36
2021-10-09-03-24-43	2021	10	9	3	24	43.58	35.2047	25.3126	7.45	2.7	3	6.76	0.1	0.4	0.26	0.61	122	26
2021-10-09-03-32-43	2021	10	9	3	32	43.76	35.1377	25.2795	8.31	1.8	4	7.53	0.1	0.52	0.39	1.22	84	13
2021-10-09-03-51-08	2021	10	9	3	51	8.41	35.1731	25.3015	6.08	1.6	3	4.96	0.12	0.46	0.32	0.81	109	17
2021-10-09-04-27-53	2021	10	9	4	27	53.83	35.1828	25.3227	4.04	3.1	3	8.71	0.16	0.32	0.25	0.5	113	20
2021-10-09-04-34-11	2021	10	9	4	34	11.22	35.2061	25.3222	7.16	1.1	3	6.38	0.07	0.64	0.48	1.28	191	11
2021-10-09-05-57-07	2021	10	9	5	57	7.7	35.1383	25.2296	9.15	1.8	4	7.23	0.09	0.47	0.38	0.73	88	15
2021-10-09-06-03-03	2021	10	9	6	3	4.1	35.139	25.2288	9.12	2.2	4	7.09	0.1	0.4	0.27	0.63	89	17
2021-10-09-06-45-51	2021	10	9	6	45	51.1	35.194	25.3101	6.99	2.3	3	5.89	0.17	0.43	0.29	0.89	117	17
2021-10-09-06-53-18	2021	10	9	6	53	19.05	35.1987	25.3158	7	2.5	3	6.32	0.14	0.38	0.32	0.75	116	28
2021-10-09-07-01-36	2021	10	9	7	2	13.91	35.1354	25.229	8.98	1.7	4	6.67	0.1	0.51	0.37	0.89	85	11
2021-10-09-07-08-16	2021	10	9	7	9	4.08	35.1802	25.2852	7.43	2.1	3	5.82	0.07	0.49	0.34	0.91	111	11
2021-10-09-07-11-33	2021	10	9	7	11	33.89	35.1246	25.2457	7.24	1.8	4	5.14	0.06	0.34	0.28	0.58	79	16
2021-10-09-07-27-51	2021	10	9	7	27	51.61	35.1369	25.2286	9.06	1.8	4	6.65	0.1	0.5	0.34	0.81	87	14
2021-10-09-09-03-41	2021	10	9	9	3	40.66	35.1747	25.3032	6.75	2	3	4.51	0.13	0.48	0.29	0.4	105	11
2021-10-09-09-05-55	2021	10	9	9	5	56.33	35.18	25.3156	6.94	2	3	4.25	0.09	0.42	0.29	1	109	13
2021-10-09-09-16-18	2021	10	9	9	16	50.59	35.1791	25.3019	7.43	2.5	3	4.77	0.18	0.51	0.35	1.09	104	13
2021-10-09-10-09-24	2021	10	9	10	9	25.04	35.1557	25.2168	9.65	2.1	4	6.78	0.09	0.42	0.34	0.73	81	18
2021-10-09-11-28-54	2021	10	9	11	28	54.35	35.1523	25.261	7.1	1.3	2	6.38	0.04	0.43	0.44	0.41	107	11
2021-10-09-12-10-37	2021	10	9	12	10	37.37	35.1496	25.1983	9.68	1.5	4	4.91	0.13	0.45	0.35	0.87	92	11
2021-10-09-12-25-50	2021	10	9	12	25	50.56	35.1946	25.3064	7.18	2.3	3	6.1	0.14	0.36	0.23	0.75	118	21
2021-10-09-14-08-48	2021	10	9	14	8	48.41	35.1774	25.3135	6.94	2.4	3	4.73	0.18	0.37	0.24	0.87	111	24
2021-10-09-14-36-52	2021	10	9	14	36	52.13	35.1818	25.288	8.39	2.3	3	6.12	0.25	0.5	0.33	0.84	98	24
2021-10-09-14-43-22	2021	10	9	14	43	22.94	35.1471	25.216	9.53	2.1	4	6.94	0.14	0.37	0.28	0.76	87	17
2021-10-09-15-08-39	2021	10	9	15	8	39.56	35.1321	25.2429	8.38	1.8	4	5.72	0.09	0.38	0.3	0.58	70	16
2021-10-09-16-16-12	2021	10	9	16	16	11.84	35.1875	25.3211	6.62	2.5	3	5.02	0.11	0.28	0.2	0.26	115	29
2021-10-09-17-03-13	2021	10	9	17	3	13.92	35.2121	25.3211	7.18	1.2	3	6.5	0.11	0.52	0.32	1.1	118	11
2021-10-09-17-04-51	2021	10	9	17	4	51.96	35.121	25.2383	8.66	1.8	4	4.59	0.11	0.37	0.25	0.63	73	19
2021-10-09-17-29-32	2021	10	9	17	29	32.52	35.1926	25.3102	6.45	2.6	3	6.27	0.11	0.33	0.21	0.83	117	35
2021-10-09-17-53-06	2021	10	9	17	53	6.28	35.1485	25.215	9.83	1.8	4	7.33	0.15	0.37	0.25	0.72	84	18
2021-10-09-18-07-48	2021	10	9	18	7	48.82	35.1317	25.2449	7.64	2.8	4	6	0.11	0.35	0.21	0.9	70	36
2021-10-09-18-34-04	2021	10	9	18	34	4.24	35.1194	25.2457	8.48	1.7	4	4.47	0.11	0.36	0.26	0.55	73	18
2021-10-09-19-16-18	2021	10	9	19	16	18.4	35.1372	25.2545	8.47	1.5	4	6.93	0.13	0.42	0.32	0.81	85	13
2021-10-09-19-25-24	2021	10	9	19	25	24	35.1524	25.225	9.47	1.3	4	8.37	0.16	0.53	0.36	0.89	75	11
2021-10-09-19-36-00	2021	10	9	19	36	0.620003	35.131	25.2355	8.16	2.6	4	6.08	0.11	0.31	0.22	0.56	70	35
2021-10-09-19-57-21	2021	10	9	19	57	21.84	35.1613	25.2544	10.78	2.5	2	7.98	0.16	0.34	0.27	0.71	68	35
2021-10-09-19-59-22	2021	10	9	19	59	23	35.1469	25.2321	8.9	1.4	4	7.63	0.18	0.55	0.4	0.93	83	12
2021-10-09-20-01-06	2021	10	9	20	1	6.16	35.1412	25.2257	9.03	1.4	4	7.48	0.2	0.62	0.42	0.88	80	11
2021-10-09-20-18-14	2021	10	9	20	18	15.12	35.162	25.2523	10.26	0.6	2	6.42	0.13	0.58	0.49	1.21	119	11
2021-10-09-21-14-32	2021	10	9	21	14	32.94	35.196	25.3231	7.93	1.9	3	6.99	0.17	0.38	0.27	1.46	128	24
2021-10-09-21-42-42	2021	10	9	21	42	42.86	35.133	25.2471	7.52	2.8	4	7.07	0.23	0.39	0.27	0.73	68	33
2021-10-09-21-57-39	2021	10	9	21	57	39.22	35.1725	25.2778	9.38	0.8	2	6.06	0.09	0.6	0.82	1.32	153	11
2021-10-09-21-59-29	2021	10	9	21	59	29.58	35.1985	25.2861	7.74	0.8	2	3.78	0.18	0.59	0.87	1.21	182	11
2021-10-09-22-24-49	2021	10	9	22	24	49.32	35.1818	25.2801	8.38	2	2	6.11	0.19	0.43	0.38	0.9	94	17
2021-10-09-22-41-47	2021	10	9	22	41	47.8	35.1371	25.2287	8.84	3	4	7.39	0.27	0.42	0.36	1.09	74	26
2021-10-09-22-52-02	2021	10	9	22	52	2.12	35.2371	25.2811	4.83	1.5	3	2.4	0.29	0.4	0.44	0.59	124	12
2021-10-09-22-58-42	2021	10	9	22	58	42.96	35.1785	25.314	7.48	1.8	3	7.38	0.12	0.43	0.34	1.09	117	13
2021-10-09-23-26-24	2021	10	9	23	26	24.96	35.1352	25.2326	9.48	0.9	4	8	0.22	0.6	0.45	2.04	92	11
2021-10-09-23-33-28	2021	10	9	23	33	29.08	35.1347	25.2325	8.58	2.9	4	7.16	0.13	0.35	0.23	0.58	76	26
2021-10-09-23-45-13	2021	10	9	23	45	13.5	35.1348	25.232	9.04	1.8	4	7.45	0.15	0.42	0.28	1.04	79	17
2021-10-09-23-54-14	2021	10	9	23	54	13.84	35.133	25.2262	10.38	0.9	4	7.82	0.38	1.02	0.72	1.82	83	11
2021-10-09-23-56-05	2021	10	9	23	56	5.4	35.1249	25.2497	8.11	2.9	4	4.66	0.13	0.35	0.25	0.62	75	28
2021-10-10-00-09-44	2021	10	10	0	9	43.74	35.1646	25.2388	10.58	1.4	2	9.03	0.07	0.59	0.35	1.37	133	12
2021-10-10-01-40-49	2021	10	10	1	40	49.17	35.126	25.2483	7.73	2.2	4	6.39	0.14	0.34	0.24	0.83	73	29
2021-10-10-01-42-46	2021	10	10	1	42	46.68	35.1991	25.3114	7.09	1.3	3	6.18	0.23	0.47	0.4	1.15	114	12
2021-10-10-01-43-19	2021	10	10	1	43	18.98	35.1998	25.3127	6.68	1.3	3	6.22	0.28	0.52	0.39	0.85	116	15
2021-10-10-02-04-14	2021	10	10	2	4	14.58	35.1613	25.2366	10.69	1.2	2	7.14	0.16	0.46	0.36	0.9	69	12
2021-10-10-02-22-16	2021	10	10	2	22	17.11	35.1856	25.3004	8.7	2.2	3	4.27	0.14	0.43	0.3	0.68	105	22
2021-10-10-02-29-17	2021	10	10	2	29	17.86	35.1303	25.2384	7.56	1.6	4	6.67	0.15	0.38	0.33	1.1	72	13
2021-10-10-02-36-31	2021	10	10	2	36	32.3	35.1967	25.3122	7.08	2.2	3	6.29	0.2	0.46	0.35	1.01	117	31
2021-10-10-02-43-31	2021	10	10	2	43	31.69	35.1958	25.3061	8.31	1.2	3	4.67	0.3	0.47	0.51	1.15	115	12
2021-10-10-03-16-47	2021	10	10	3	16	47.36	35.1335	25.2374	9.52	2.1	4	6.46	0.12	0.35	0.29	0.77	71	20
2021-10-10-03-49-04	2021	10	10	3	49	3.86	35.1482	25.2312	11.12	2.8	4	8.06	0.12	0.38	0.27	0.77	75	41
2021-10-10-04-35-33	2021	10	10	4	35	34.23	35.1741	25.2862	8.86	2.5	2	5.6	0.11	0.38	0.27	0.6	86	33
2021-10-10-05-04-49	2021	10	10	5	4	49.35	35.191	25.3097	7.29	2.2	3	5.83	0.1	0.35	0.27	0.72	115	27
2021-10-10-05-26-54	2021	10	10	5	26	54.68	35.1469	25.2285	10.19	2.5	4	8.09	0.12	0.43	0.28	0.64	72	34
2021-10-10-06-11-47	2021	10	10	6	11	47.25	35.1375	25.1941	10.8	2.9	4	8.03	0.1	0.47	0.31	0.75	95	37
2021-10-10-06-46-25	2021	10	10	6	46	25.03	35.1389	25.2292	9.57	0.9	4	7.31	0.12	0.56	0.36	0.95	79	11
2021-10-10-06-58-24	2021	10	10	6	58	25.06	35.1743	25.3014	7.41	1.3	3	7.35	0.1	0.74	0.7	1.58	214	11
2021-10-10-07-18-32	2021	10	10	7	18	33.07	35.1804	25.2635	10.4	2.1	2	5.4	0.11	0.49	0.41	0.79	83	18
2021-10-10-07-39-31	2021	10	10	7	39	31.85	35.1924	25.3081	7.08	2.6	3	14.7	0.12	0.49	0.3	0.61	119	22
2021-10-10-08-34-33	2021	10	10	8	34	34.13	35.1851	25.2914	7.99	1.2	3	4.89	0.16	0.63	0.49	1	130	12
2021-10-10-08-37-29	2021	10	10	8	37	28.85	35.1935	25.2758	9.12	1.5	2	4.8	0.1	0.53	0.36	0.96	108	17
2021-10-10-09-12-02	2021	10	10	9	12	2.76	35.1468	25.2354	13.53	2.4	4	7.02	0.11	0.43	0.27	0.73	82	22
2021-10-10-11-46-49	2021	10	10	11	46	49.23	35.1978	25.3062	7.33	2.6	3	5.62	0.1	0.37	0.27	0.67	113	23
2021-10-10-12-20-50	2021	10	10	12	20	50.09	35.1687	25.2532	9.89	1.8	2	6.83	0.08	0.51	0.39	1.02	116	11
2021-10-10-12-44-49	2021	10	10	12	44	49.75	35.1573	25.2318	10.8	2	2	7.48	0.17	0.41	0.3	0.88	72	14
2021-10-10-13-01-35	2021	10	10	13	1	35.58	35.1476	25.2411	10.34	1.6	4	7.68	0.21	0.66	0.61	2.51	99	12
2021-10-10-13-04-24	2021	10	10	13	4	24.92	35.1942	25.3052	7.38	1	3	6.21	0.14	0.44	0.33	0.86	119	12
2021-10-10-13-05-04	2021	10	10	13	5	4.37	35.2001	25.3061	8.17	1.4	3	5.94	0.2	0.42	0.28	0.36	115	24
2021-10-10-13-10-43	2021	10	10	13	10	43.34	35.197	25.3039	7.66	2.4	3	5.51	0.13	0.36	0.24	0.8	117	40
2021-10-10-15-03-13	2021	10	10	15	3	13.61	35.1225	25.2478	7.62	1.5	4	5.05	0.09	0.32	0.23	0.74	69	26
2021-10-10-15-18-57	2021	10	10	15	18	57.41	35.1367	25.2002	10.31	2.4	4	5.44	0.13	0.3	0.21	0.6	102	33
2021-10-10-17-06-09	2021	10	10	17	6	9.96	35.1289	25.2497	7.78	2	4	6.04	0.13	0.39	0.27	0.61	77	24
2021-10-10-17-30-46	2021	10	10	17	30	46.56	35.1921	25.3093	6.81	2.1	3	6.1	0.15	0.33	0.23	0.86	118	31
2021-10-10-17-37-35	2021	10	10	17	37	35.38	35.1362	25.2535	7.21	0.9	4	6.3	0.14	0.4	0.35	1.33	88	12
2021-10-10-17-46-50	2021	10	10	17	46	50.2	35.1843	25.3062	6.92	1.5	3	5.23	0.12	0.38	0.25	0.86	114	17
2021-10-10-17-48-19	2021	10	10	17	48	19.2	35.1333	25.2378	8.88	1.6	4	7.26	0.14	0.44	0.31	0.73	68	19
2021-10-10-18-46-31	2021	10	10	18	46	46.7	35.1395	25.2308	10.77	1.3	4	6.65	0.13	0.38	0.27	0.64	80	18
2021-10-10-18-49-50	2021	10	10	18	49	50.64	35.1895	25.3105	6.74	1.3	3	6.3	0.14	0.41	0.29	0.92	118	16
2021-10-10-19-04-38	2021	10	10	19	4	37.88	35.193	25.3127	6.6	2.6	3	6.19	0.14	0.33	0.22	0.3	117	38
2021-10-10-19-43-08	2021	10	10	19	43	8.7	35.1733	25.2347	9.24	1.3	2	5.45	0.13	0.46	0.34	0.91	71	11
2021-10-10-20-05-49	2021	10	10	20	6	17.44	35.1963	25.307	7.54	1.5	3	5.88	0.12	0.42	0.29	1.1	117	12
2021-10-10-20-08-42	2021	10	10	20	9	1.76	35.1961	25.3041	7.53	1.8	3	6.62	0.05	0.59	0.73	1.49	192	11
2021-10-10-20-58-34	2021	10	10	20	58	34.54	35.1975	25.3052	8.21	1.3	3	5.61	0.12	0.35	0.24	0.7	115	16
2021-10-10-21-26-31	2021	10	10	21	26	30.4	35.1475	25.2337	11.28	2.4	4	7.61	0.12	0.36	0.23	0.67	74	33
2021-10-10-21-28-11	2021	10	10	21	28	11.64	35.1972	25.3077	7.64	1.7	3	5.95	0.09	0.33	0.23	0.81	115	27
2021-10-10-22-06-49	2021	10	10	22	6	49.2	35.196	25.3061	7.62	3.1	3	5.83	0.11	0.33	0.21	0.71	117	48
2021-10-10-22-10-30	2021	10	10	22	10	29.96	35.2	25.305	7.72	2.4	3	5.99	0.13	0.31	0.22	0.77	113	43
2021-10-10-22-33-52	2021	10	10	22	33	52.52	35.1296	25.2287	9.37	1.3	4	5.5	0.12	0.4	0.27	0.65	81	16
2021-10-10-22-35-47	2021	10	10	22	35	46.72	35.1982	25.3081	7.63	2.3	3	5.57	0.18	0.38	0.23	0.93	116	40
2021-10-10-22-53-08	2021	10	10	22	53	8.08	35.1952	25.308	7.05	1.8	3	6.08	0.11	0.28	0.23	0.26	117	21
2021-10-11-00-16-33	2021	10	11	0	16	33.42	35.212	25.3016	7.52	1	3	5.24	0.21	0.46	0.3	1.08	128	17
2021-10-11-00-44-09	2021	10	11	0	44	9.63	35.1499	25.2333	12.74	0.8	4	7.82	0.16	0.63	0.43	0.99	79	13
2021-10-11-00-46-00	2021	10	11	0	46	0.970001	35.1694	25.2386	10.34	0.7	2	4.75	0.14	0.68	0.42	0.96	108	12
2021-10-11-00-46-08	2021	10	11	0	46	8.61	35.2054	25.3036	6.64	0.8	3	6.3	0.11	0.59	0.58	1.17	201	11
2021-10-11-01-01-45	2021	10	11	1	2	3.73	35.1961	25.3057	7.22	1.4	3	6.86	0.4	0.77	0.44	1.67	139	17
2021-10-11-01-04-33	2021	10	11	1	4	33.58	35.1533	25.2338	12.34	1.1	4	7.26	0.14	0.56	0.35	0.8	70	14
2021-10-11-01-06-56	2021	10	11	1	6	56.02	35.1944	25.3044	7.87	1.2	3	6.81	0.16	0.47	0.33	0.9	130	14
2021-10-11-01-19-49	2021	10	11	1	19	48.89	35.1978	25.3005	7.12	1	3	5.98	0.1	0.34	0.24	0.34	119	15
2021-10-11-01-32-05	2021	10	11	1	32	5.56	35.1425	25.234	9.49	1	4	6.99	0.12	0.38	0.26	0.7	69	14
2021-10-11-01-36-42	2021	10	11	1	36	42.65	35.1965	25.3042	7.43	1	3	5.94	0.16	0.48	0.33	0.87	125	13
2021-10-11-01-40-11	2021	10	11	1	40	11.84	35.1966	25.3059	7.32	1.7	3	5.98	0.21	0.46	0.28	1.15	119	29
2021-10-11-01-47-17	2021	10	11	1	47	24.16	35.1872	25.3264	5.59	1.3	3	3.76	0.04	0.94	0.47	1.65	110	11
2021-10-11-01-49-11	2021	10	11	1	49	10.91	35.1976	25.3066	7.22	2.2	3	5.9	0.15	0.38	0.22	0.8	117	34
2021-10-11-02-16-42	2021	10	11	2	16	41.86	35.1779	25.2835	8.25	2.8	3	6.74	0.89	1.29	0.74	2.28	125	49
2021-10-11-02-20-00	2021	10	11	2	20	0.550003	35.1687	25.2843	8.33	2	2	5.45	0.11	0.37	0.22	0.54	88	33
2021-10-11-02-22-05	2021	10	11	2	22	5.09	35.1956	25.3058	7.16	1.8	3	5.47	0.11	0.32	0.22	0.68	114	31
2021-10-11-02-32-15	2021	10	11	2	33	0.980003	35.1619	25.3312	8.93	1.6	3	3.68	0.15	0.49	0.31	0.65	110	16
2021-10-11-02-44-59	2021	10	11	2	44	58.72	35.1941	25.3153	6.08	2.5	3	5.93	0.13	0.37	0.23	0.84	116	35
2021-10-11-02-53-05	2021	10	11	2	53	22	35.1607	25.2458	10.56	1.6	2	6.1	0.12	0.34	0.24	0.63	84	27
2021-10-11-02-58-37	2021	10	11	2	58	37.24	35.178	25.2818	7.89	2.5	2	6.28	0.13	0.38	0.24	0.63	95	41
2021-10-11-03-03-46	2021	10	11	3	3	45.88	35.1976	25.3153	6.59	2.5	3	6.17	0.1	0.37	0.2	0.75	117	33
2021-10-11-03-05-48	2021	10	11	3	5	48.36	35.18	25.3149	6.73	1.8	3	4.38	0.13	0.34	0.2	0.69	110	27
2021-10-11-03-25-55	2021	10	11	3	26	29.87	35.1377	25.2312	9.61	1	4	7.42	0.08	0.5	0.35	1.03	111	11
2021-10-11-03-27-16	2021	10	11	3	27	15.87	35.1978	25.3139	6.6	2.1	3	6.34	0.11	0.32	0.21	0.84	117	30
2021-10-11-03-35-18	2021	10	11	3	35	17.5	35.1462	25.2293	10.33	2.1	4	8.12	0.14	0.37	0.27	0.7	73	31
2021-10-11-03-39-37	2021	10	11	3	39	37.51	35.1776	25.3146	6.96	2.9	3	4.6	0.17	0.34	0.21	0.81	112	44
2021-10-11-04-36-32	2021	10	11	4	36	41.55	35.1237	25.2313	9.3	1.9	4	8.58	0.05	1.1	0.45	2.58	215	11
2021-10-11-05-35-35	2021	10	11	5	36	13.41	35.134	25.2605	7.55	1.8	4	5.56	0.14	0.48	0.37	0.86	80	12
2021-10-11-06-43-22	2021	10	11	6	43	54.61	35.1548	25.2687	7.84	1.6	2	5.2	0.09	0.57	0.51	1.02	129	11
2021-10-11-07-03-52	2021	10	11	7	3	52.29	35.2009	25.3154	6.5	2.1	3	7.27	0.22	0.46	0.32	1.44	128	17
2021-10-11-07-08-11	2021	10	11	7	8	35.48	35.1466	25.2143	10.65	1.8	4	6.57	0.14	0.51	0.34	0.87	89	14
2021-10-11-07-27-05	2021	10	11	7	27	5.35	35.1248	25.2341	8.23	1.4	4	7.34	0.14	0.49	0.36	0.83	67	12
2021-10-11-07-33-33	2021	10	11	7	34	6.5	35.2008	25.3169	6.86	1.5	3	5.95	0.07	5.17	6.17	1.79	172	11
2021-10-11-08-02-21	2021	10	11	8	2	21.18	35.133	25.2377	9.13	1.5	4	6.01	0.13	0.53	0.34	0.93	82	11
2021-10-11-08-16-12	2021	10	11	8	16	31.16	35.1999	25.3083	7.35	1.7	3	5.99	0.04	0.6	0.59	1.66	170	11
2021-10-11-08-39-36	2021	10	11	8	39	36.88	35.1804	25.2367	8.27	1.7	2	5.62	0.11	0.42	0.29	0.82	65	14
2021-10-11-09-18-08	2021	10	11	9	19	5.98	35.1616	25.2426	10.15	1.2	2	6.97	0.11	0.47	0.46	1.19	105	11
2021-10-11-09-27-53	2021	10	11	9	27	53.54	35.1421	25.208	10.21	2.1	4	5.92	0.13	0.38	0.26	0.76	91	21
2021-10-11-09-48-23	2021	10	11	9	48	35.96	35.1958	25.3103	6.86	1.7	3	7.1	0.09	0.49	0.44	1.51	125	11
2021-10-11-09-58-29	2021	10	11	9	58	30.1	35.1605	25.2246	9.7	1.5	2	6.55	0.16	0.68	0.54	1.27	132	11
2021-10-11-10-09-53	2021	10	11	10	10	0.790001	35.1399	25.2496	7.06	2.1	4	6.41	0.12	0.44	0.33	0.85	75	20
2021-10-11-10-21-26	2021	10	11	10	22	11.12	35.1222	25.2445	7.8	1.5	4	5.29	0.09	0.59	0.45	1.47	102	11
2021-10-11-10-40-54	2021	10	11	10	40	54.35	35.133	25.1977	11.08	2.2	4	5.71	0.13	0.42	0.29	0.84	98	23
2021-10-11-12-47-39	2021	10	11	12	47	39.65	35.1291	25.1943	11.22	3.8	4	7.27	0.09	0.36	0.26	0.82	104	95
2021-10-11-13-23-16	2021	10	11	13	23	15.47	35.1777	25.2658	9.02	1.4	2	5.53	0.3	0.59	0.44	1.16	90	12
2021-10-11-13-38-38	2021	10	11	13	38	39.67	35.1339	25.1925	10.19	1.8	4	7.69	0.06	0.53	0.4	1.2	101	11
2021-10-11-13-51-00	2021	10	11	13	51	0.209999	35.1789	25.3142	6.74	2.1	3	4.13	0.06	0.47	0.31	0.93	109	11
2021-10-11-13-56-12	2021	10	11	13	57	20.51	35.1332	25.1972	10.29	2.6	4	4.89	0.1	0.36	0.25	0.69	104	39
2021-10-11-14-09-53	2021	10	11	14	9	54.19	35.1354	25.23	9.73	1.7	4	5.8	0.1	0.59	0.76	1.39	155	11
2021-10-11-14-17-26	2021	10	11	14	18	31.64	35.1792	25.315	6.82	1.2	3	4.38	0.12	0.46	0.33	1.17	109	11
2021-10-11-14-26-38	2021	10	11	14	26	38.07	35.1969	25.3055	7.47	2.1	3	5.99	0.12	0.5	0.34	0.95	119	20
2021-10-11-15-42-24	2021	10	11	15	42	23.82	35.1828	25.3	8.3	2.2	3	4.88	0.11	0.42	0.29	0.7	111	14
2021-10-11-15-48-20	2021	10	11	15	48	20.33	35.1776	25.3142	7.14	2.3	3	4.77	0.12	0.4	0.31	0.39	113	14
2021-10-11-15-54-04	2021	10	11	15	54	49.87	35.178	25.3121	6.85	1.4	3	3.91	0.04	0.66	0.91	1.71	193	11
2021-10-11-16-16-41	2021	10	11	16	16	41.86	35.1953	25.3063	7.91	1.6	3	5	0.17	0.65	0.65	1.51	200	11
2021-10-11-16-36-23	2021	10	11	16	36	23.11	35.1963	25.3128	6.88	1.3	3	7.28	0.16	0.59	0.47	2.05	129	11
2021-10-11-17-35-42	2021	10	11	17	36	18.72	35.1838	25.3007	8.7	1.1	3	6.33	0.08	0.54	0.7	1.57	179	11
2021-10-11-17-37-45	2021	10	11	17	38	41.76	35.1626	25.2767	7.92	1.2	2	4.63	0.06	0.47	0.75	1.18	146	11
2021-10-11-17-40-40	2021	10	11	17	41	17.12	35.1966	25.3054	7.46	1.4	3	5.82	0.07	0.85	0.54	1.73	177	11
2021-10-11-18-06-22	2021	10	11	18	6	22.64	35.1983	25.3168	6.88	1	3	6.65	0.13	0.43	0.37	1.17	121	11
2021-10-11-18-12-17	2021	10	11	18	12	17.88	35.1372	25.2514	6.8	2	4	6.69	0.09	0.36	0.26	0.54	73	16
2021-10-11-18-22-01	2021	10	11	18	22	0.639999	35.1785	25.3284	5.41	2.2	3	4.31	0.14	0.29	0.2	0.31	114	33
2021-10-11-18-26-39	2021	10	11	18	27	6.52	35.1878	25.299	7.92	1.3	3	6.08	0.07	0.84	0.48	1.35	169	11
[truncated: 488 more rows]
